# Supplementary material for: Multi-Omics Analysis to Generate Hypotheses for Mild Health Problems in Monkeys
Source: Metabolites. 2021 Oct 13;11(10):701. doi: 10.3390/metabo11100701 (PMC8538200; doi:10.3390/metabo11100701)
Supplement: Supplementary file 1 [file metabolites-11-00701-s001.zip]

Archive with 19 entries (19 files):
- Supplementary Figure S1.pdf
- Supplementary Figure S2.pdf
- Suppl_Figure_S1.JPG
- Suppl_Figure_S2.jpg
- Suppl_Table_Figure_Legends.pdf
- Suppl_Table_S10_Fecal _Oxidized_Fatty_acids.xlsx
- Suppl_Table_S11_Plasma_Oxidized_Fatty_acids.xlsx
- Suppl_Table_S12_Urinary_Oxidized_Fatty_acids.xlsx
- Suppl_Table_S13_Metallomics_Plasma_Feces_Urine.xlsx
- Suppl_Table_S14_Food_Metallomics.xlsx
- Suppl_Table_S1__Plasma-Metabolomics.xlsx
- Suppl_Table_S2_Urine-Metabolomics.xlsx
- Suppl_Table_S3_Fecal-Metabolomics.xlsx
- Suppl_Table_S4__HMDB-Feces-Metabolomics.xlsx
- Suppl_Table_S5_Plasma-fatty acids-GC.xlsx
- Suppl_Table_S6_Food_lipidmics.xlsx
- Suppl_Table_S7_Fecal_Lipidomics.xlsx
- Suppl_Table_S8_Plasma-Lipidomics.xlsx
- Suppl_Table_S9_Urinary-Lipidomics.xlsx
