# Supplementary material for: Multi-Omics Analysis to Generate Hypotheses for Mild Health Problems in Monkeys
Source: Metabolites. 2021 Oct 13;11(10):701. doi: 10.3390/metabo11100701 (PMC8538200; doi:10.3390/metabo11100701)
Supplement: Supplementary file 1 [file metabolites-11-00701-s001.zip › Suppl_Table_S1__Plasma-Metabolomics.xlsx]

## Sheet: Plasma-Hydrophilic
Observed MW	466.312	298.251	228.209	781.56	466.312	326.192	294.186	308.202	326.282	266.155	280.171	280.24	298.054	474.392	278.225	308.166	418.329	282.151	284.271	282.256	358.309	394.285	300.267	298.251	254.225	224.178	390.298	90.0467	117.058	104.062	118.078	280.131	134.073	106.078	294.11	114.047	128.047	414.203	845.432	272.235	474.225	220.11	296.235	228.209	240.173	242.188	781.56	122.073	202.03
RT min	0.909	0.972	1.047	1.096	1.126	1.15	1.151	1.153	1.155	1.156	1.156	1.159	1.165	1.165	1.174	1.174	1.183	1.187	1.188	1.191	1.197	1.199	1.202	1.203	1.203	1.203	1.204	1.205	1.205	1.205	1.206	1.206	1.206	1.206	1.206	1.206	1.206	1.207	1.209	1.209	1.212	1.213	1.214	1.238	1.272	1.285	1.289	1.289	1.301
Mokey 1	344.69	2748.46	20455	683071	40771.3	8329.75	24682.6	10126.8	150069	98292.2	5663.81	4.75515e+06	156361	98975.7	411230	5870.51	5.22682e+07	11115.3	4.58592e+07	5.7043e+06	5.80512e+06	4.61469e+06	5.99103e+06	5.26158e+06	885017	7243.44	5.94689e+06	1.66385e+07	4.75246e+06	2.51244e+06	6.58463e+07	2.00175e+07	1.73961e+07	4.98941e+06	5.06006e+06	3.19248e+06	720738	4.72887e+08	2.40578e+07	1.13678e+06	3.27796e+07	186360	479321	305801	11156.3	15580	683071	114974	5.08231e+06
Mokey 2	171.422	1948.64	19240.2	619859	101052	35395.1	348562	263360	648883	1.11858e+06	171770	3.62195e+07	291300	86389.9	3.18714e+06	12711.2	5.21775e+07	24093.6	4.24277e+07	3.63808e+07	4.7013e+06	3.78701e+06	3.67956e+07	3.69104e+07	5.22334e+06	123012	6.12184e+06	1.9306e+07	5.57627e+06	3.01695e+06	7.94479e+07	2.34075e+07	2.08703e+07	5.80341e+06	5.84599e+06	3.78151e+06	929805	5.8698e+08	3.2016e+07	5.73529e+06	3.41324e+07	182263	3.48996e+06	1.36379e+06	98533.4	192448	1.70706e+06	17485.6	752285
Mokey 3	171.281	1704.05	31236	142184	75805.3	20970.6	18044.5	9684.19	425087	56965.7	5416.25	1.35509e+07	328168	122879	1.23373e+06	5613.92	6.1815e+07	10629.5	4.145e+07	1.272e+07	4.85381e+06	3.46498e+06	1.31467e+07	1.41457e+07	1.16384e+06	31552.5	7.84669e+06	1.47183e+07	4.20235e+06	2.26883e+06	6.12641e+07	1.85197e+07	1.59806e+07	4.66183e+06	4.53168e+06	2.76768e+06	699879	4.49115e+08	1.78875e+07	1.50213e+06	2.1447e+07	149448	1.4107e+06	451574	40080	54660.9	2.42218e+06	61711.6	2.6324e+06
Mokey 4	171.258	1909.6	11004	657699	77904	14896	9141.35	10508	429607	58805.1	5876.97	2.19399e+07	237143	116918	2.34339e+06	6302.13	6.59887e+07	11932.6	4.4403e+07	1.63687e+07	4.5754e+06	2.87312e+06	1.69181e+07	2.32107e+07	2.55668e+06	71802.9	7.83724e+06	1.72122e+07	4.98256e+06	2.71005e+06	6.89401e+07	2.02934e+07	1.80944e+07	5.10727e+06	5.03347e+06	3.29762e+06	835988	5.24179e+08	2.24367e+07	3.09146e+06	2.50162e+07	152387	2.69692e+06	1.12824e+06	70339.8	169690	1.37077e+06	176293	7.30051e+06
Mokey 5	169.917	2164	12161.5	56212.3	35516.3	20861.9	28646.4	13821.6	413924	291393	5416.17	1.78204e+07	349859	93618.4	1.43674e+06	6154.89	5.89387e+07	11653.8	3.94174e+07	1.38159e+07	4.63285e+06	3.56278e+06	1.41002e+07	1.83406e+07	1.90421e+06	36713.9	6.44099e+06	1.90947e+07	5.45954e+06	2.98288e+06	7.79285e+07	2.2132e+07	2.03519e+07	5.79728e+06	5.77894e+06	3.79814e+06	916635	5.45956e+08	2.88674e+07	2.27228e+06	3.12441e+07	185871	1.58702e+06	548885	39150.4	56297.7	203351	83232	3.84152e+06
Mokey 6	3983.47	2595.36	18905.1	343964	105142	96444	247406	209177	398826	833170	94700.8	1.8752e+07	245432	80271.7	1.81571e+06	13623.8	5.2695e+07	12291.6	4.08147e+07	2.28433e+07	4.87873e+06	3.87217e+06	2.3516e+07	1.95931e+07	4.73566e+06	68941.7	6.79903e+06	1.96792e+07	5.50832e+06	3.05598e+06	7.82734e+07	2.28958e+07	2.04708e+07	5.85084e+06	5.63347e+06	3.63518e+06	1.00323e+06	5.72939e+08	2.87258e+07	5.42885e+06	3.28408e+07	198594	2.11434e+06	976856	59669.3	119172	2.12121e+06	59707.9	2.57405e+06
Mokey 7	232.538	1922.31	10499.5	173804	134451	11799.5	22642.6	9831.75	286129	116556	17456	1.54312e+07	338663	108774	1.41429e+06	5886.89	6.65801e+07	11146.3	4.41289e+07	1.03614e+07	5.42251e+06	4.19466e+06	1.06951e+07	1.60774e+07	1.23344e+06	25994.1	7.08226e+06	1.93047e+07	5.64487e+06	3.14104e+06	8.00559e+07	2.37345e+07	2.05112e+07	6.26891e+06	5.95646e+06	3.86821e+06	963045	5.94623e+08	3.06647e+07	1.53088e+06	3.46102e+07	210866	1.63241e+06	411425	37648.3	49272.7	1.57751e+06	138509	6.34391e+06
Mokey 8	235.012	1825.1	26344.3	941806	107600	27065.7	27430.9	12855.2	519819	129709	9295.98	2.79601e+07	298294	84510.5	2.59022e+06	6606.09	5.61093e+07	12508.1	3.90316e+07	2.12574e+07	5.49435e+06	4.47477e+06	2.17632e+07	2.90296e+07	3.60117e+06	114451	6.67664e+06	1.97078e+07	5.97558e+06	3.1833e+06	8.18477e+07	2.38479e+07	2.13768e+07	6.19578e+06	5.8571e+06	3.78731e+06	913104	6.06397e+08	3.14392e+07	4.09091e+06	3.28571e+07	182373	2.92017e+06	1.06578e+06	90270.5	235104	2.3579e+06	137614	6.3397e+06
Mokey 9	4462	1657	11671.3	182111	90823.8	142313	167415	158013	392613	544668	98351.1	2.17373e+07	237683	117028	2.19667e+06	6661.6	6.48541e+07	13037.9	4.02058e+07	1.35659e+07	6.75918e+06	5.19686e+06	1.39021e+07	2.26575e+07	1.81846e+06	76045.9	7.9287e+06	1.7334e+07	5.12619e+06	2.82374e+06	7.35473e+07	2.08207e+07	1.80622e+07	5.46145e+06	5.20001e+06	3.3808e+06	872307	5.52318e+08	2.72327e+07	2.2195e+06	2.82879e+07	189682	2.55195e+06	531883	71075.6	136828	1.97398e+06	137955	6.08014e+06
Mokey 10	195.172	1896.53	8702.89	55873.7	91540.4	41433.7	74397.1	42522.3	337100	212537	10514.7	1.61162e+07	304992	102314	1.56526e+06	8336.37	5.96431e+07	11125.3	3.59546e+07	1.36726e+07	7.09794e+06	5.82286e+06	1.40939e+07	1.67723e+07	2.24879e+06	52256.3	7.17228e+06	1.74698e+07	5.10667e+06	2.86617e+06	7.26103e+07	2.16287e+07	1.90553e+07	5.32503e+06	5.53628e+06	3.41547e+06	926203	5.64188e+08	2.66211e+07	2.62688e+06	2.96038e+07	167087	1.8012e+06	764711	67867.2	95626.5	2.25128e+06	108296	5.17007e+06
Mokey 11	212.806	1716.5	13846.2	1.0547e+06	130369	71467	192008	142397	459288	753875	66318.8	2.73756e+07	240869	111534	3.26011e+06	10963.7	5.91822e+07	14405.4	4.08224e+07	2.55512e+07	6.9933e+06	5.91908e+06	2.59138e+07	2.81228e+07	3.78881e+06	55643.1	7.22652e+06	1.97969e+07	5.79102e+06	3.19225e+06	8.37055e+07	2.43955e+07	2.1731e+07	6.11159e+06	6.04082e+06	3.81376e+06	973504	6.09803e+08	2.95055e+07	4.25382e+06	3.24206e+07	175511	3.55084e+06	1.06969e+06	73586.1	98383.2	3.67671e+06	76454.9	3.64784e+06
Mokey 12	222.314	1637.35	8863.42	1.15213e+06	153719	32603.9	30670.6	12249.3	505591	113122	8925.79	2.70552e+07	268413	107962	2.52349e+06	6175.69	5.63613e+07	11693.2	3.58849e+07	2.23177e+07	7.02467e+06	5.77609e+06	2.26097e+07	2.76902e+07	3.82918e+06	66639.7	6.88385e+06	1.70016e+07	4.98047e+06	2.69617e+06	7.28487e+07	2.08992e+07	1.85632e+07	5.11196e+06	5.32065e+06	3.12848e+06	800463	5.29594e+08	2.63307e+07	4.21324e+06	2.73243e+07	146899	2.76524e+06	900229	87115.2	113799	3.52737e+06	28681.2	1.14586e+06
Mokey 13	198.812	1681	13023.9	1.38815e+06	70993.3	107680	69357.2	52776.1	96584.1	149403	48240.7	2.09402e+06	480960	138554	177267	5295.82	6.6638e+07	9964.44	3.92694e+07	1.46308e+06	8.70576e+06	6.3707e+06	1.71197e+06	2.43727e+06	128230	6493.44	8.94842e+06	1.23656e+07	3.29937e+06	2.03543e+06	5.05834e+07	1.57653e+07	1.32667e+07	3.86852e+06	3.87791e+06	2.31472e+06	613261	4.07379e+08	1.57397e+07	279192	1.67138e+07	106921	226201	142476	11892.9	14604	1.38815e+06	177606	6.99762e+06
Mokey 14	405.418	2041.11	17930.1	198051	156139	15246.8	5591.6	10464.1	360320	34377.9	5852.43	2.05391e+07	290557	88680.2	1.94562e+06	6066.01	5.71159e+07	11485.5	3.47389e+07	1.68443e+07	6.82681e+06	5.71243e+06	1.71957e+07	2.10823e+07	2.51081e+06	55790.9	6.56295e+06	1.80769e+07	5.3196e+06	2.87966e+06	7.38399e+07	2.23184e+07	1.92176e+07	5.54509e+06	5.38898e+06	3.52181e+06	896730	5.44806e+08	2.77277e+07	2.95785e+06	2.86632e+07	147663	2.1393e+06	758932	68181.3	98835.2	2.26656e+06	35145.1	1.72163e+06
Mokey 15	623.631	1625.46	20025.2	603715	62672.8	921227	214198	142503	450356	540799	81543	2.23997e+07	408483	86223.1	1.90344e+06	8790.79	5.62292e+07	12363	3.57149e+07	1.82555e+07	6.80734e+06	5.78984e+06	1.85636e+07	2.30005e+07	3.37225e+06	91888.1	7.05585e+06	2.19027e+07	6.37263e+06	3.44494e+06	9.14426e+07	2.56976e+07	2.26724e+07	6.64396e+06	6.30546e+06	4.31966e+06	1.14506e+06	6.57594e+08	3.32045e+07	3.80388e+06	3.70525e+07	189910	2.58097e+06	844155	110254	166666	1.98627e+06	56569.4	2.76501e+06
Mokey 16	594.151	1518.7	10886.1	573761	115940	963655	2.02004e+06	2.02227e+06	315667	5.63394e+06	1.2448e+06	1.47638e+07	339050	100697	1.3654e+06	1.17807e+06	6.73886e+07	63596.6	4.27536e+07	1.42962e+07	6.82098e+06	5.52941e+06	1.48003e+07	1.54304e+07	1.81376e+06	31388.9	8.10269e+06	1.97554e+07	5.87205e+06	3.31446e+06	8.40679e+07	2.42814e+07	2.23929e+07	6.19883e+06	6.10919e+06	4.05874e+06	1.00774e+06	6.0764e+08	3.15456e+07	2.24452e+06	3.10794e+07	161440	1.58971e+06	812006	40850.6	63341.9	1.46883e+06	135298	5.54871e+06
Mokey 17	203.863	1567.2	12311.1	119186	157610	17095	28003.3	9853.89	420904	110557	15146.9	2.2105e+07	410100	101819	1.98964e+06	6641.58	5.83702e+07	12575.3	3.76927e+07	2.28586e+07	7.33427e+06	6.09244e+06	2.31934e+07	2.27052e+07	4.76803e+06	156707	7.25384e+06	1.93006e+07	5.59026e+06	2.99457e+06	7.99358e+07	2.24765e+07	2.00941e+07	5.79405e+06	5.3976e+06	3.77066e+06	978278	5.58864e+08	2.84221e+07	5.19423e+06	3.13088e+07	167050	2.20094e+06	1.0823e+06	88960.3	220999	3.56947e+06	71833.7	3.29087e+06
Mokey 18	982.251	1859.76	11056.8	237633	124286	12194.5	27399.1	14180	450834	139967	6431.33	1.93174e+07	282705	105125	1.77387e+06	6666.05	5.79527e+07	12621.6	3.84444e+07	2.08077e+07	7.57368e+06	6.4161e+06	2.12347e+07	1.99704e+07	2.62078e+06	50241.9	7.2311e+06	1.99069e+07	5.76815e+06	3.23259e+06	8.19435e+07	2.34923e+07	2.0612e+07	5.80111e+06	5.94084e+06	3.75182e+06	979413	6.02918e+08	3.00039e+07	3.06262e+06	3.09472e+07	166921	1.97826e+06	942703	54354.8	93718.3	1.54702e+06	118344	5.39991e+06
Mokey 19	210.163	1902.41	22482.1	1.44114e+06	225909	226844	155644	34707.1	310599	797941	30446.5	1.77957e+07	481259	120562	1.67297e+06	10973.8	6.31274e+07	31885	3.61649e+07	1.34558e+07	7.65602e+06	6.21102e+06	1.37593e+07	1.83199e+07	2.71238e+06	66571.3	7.78174e+06	1.7914e+07	4.95134e+06	2.73694e+06	7.38524e+07	2.07304e+07	1.80563e+07	5.24792e+06	5.63301e+06	3.47618e+06	926555	4.96349e+08	2.08865e+07	3.0293e+06	2.31281e+07	132169	1.86705e+06	692913	51563.2	105697	4.8731e+06	109405	4.62174e+06
Mokey 20	3618.53	1855.54	10029.5	218388	97179.5	21468	13124.5	13039.8	372496	106044	5968.28	1.8917e+07	450005	96630.9	1.77134e+06	9716.07	5.43351e+07	11712.9	3.3603e+07	1.74828e+07	6.602e+06	5.51001e+06	1.7825e+07	1.94796e+07	2.70462e+06	93338.8	6.47523e+06	1.91462e+07	5.54627e+06	2.91367e+06	8.29108e+07	2.06309e+07	1.93297e+07	5.77701e+06	5.28764e+06	3.75783e+06	903515	4.56954e+08	2.41175e+07	3.0382e+06	2.77496e+07	170931	1.99235e+06	918344	80342.4	159701	2.1632e+06	125200	5.65597e+06
Pearson Correlation with Stool Water	0.0972516	-0.206463	-0.124514	-0.25208	0.0331659	-0.257534	-0.168655	-0.170472	0.519092	-0.149538	-0.173211	0.445497	0.135071	-0.137801	0.397851	-0.185926	-0.103849	-0.178334	-0.0524517	0.41833	-0.380332	-0.305412	0.416981	0.442543	0.346038	0.321025	-0.227415	0.290959	0.292026	0.260812	0.351721	0.240327	0.304646	0.347417	0.272292	0.270446	0.226112	0.187568	0.260116	0.33722	0.236949	0.413313	0.379642	0.277569	0.317676	0.270337	0.120872	-0.213021	-0.167771
ｔ	0.414569	-0.895238	-0.532413	-1.10517	0.140789	-1.13076	-0.725939	-0.733994	2.57666	-0.641651	-0.74615	2.11116	0.578358	-0.59027	1.83981	-0.802814	-0.442989	-0.768934	-0.22284	1.95402	-1.74473	-1.36077	1.94639	2.09374	1.56479	1.43811	-0.9908	1.29026	1.29543	1.1462	1.59408	1.05041	1.35701	1.57187	1.2006	1.19182	0.98482	0.810161	1.14292	1.51972	1.03476	1.92572	1.74103	1.22579	1.42141	1.1913	0.516604	-0.925002	-0.722028
p	0.683357	0.382476	0.600951	0.283638	0.889601	0.272997	0.47721	0.472406	0.0190083	0.529187	0.465211	0.0490065	0.570189	0.562348	0.082347	0.432555	0.663052	0.451905	0.826169	0.066417	0.0980816	0.190382	0.067389	0.0507086	0.135043	0.167561	0.334916	0.213291	0.21154	0.266722	0.128326	0.307431	0.191553	0.133392	0.245468	0.248811	0.337766	0.428429	0.268045	0.145952	0.314485	0.0700855	0.0987434	0.236073	0.172291	0.249008	0.611721	0.367201	0.479553
Spearman Correlation with Stool Water	-0.218045	0.00451128	-0.255639	-0.342857	0.0601504	-0.184962	-0.0360902	-0.177444	0.410526	0.0165414	-0.0947368	0.279699	0.123308	-0.0857143	0.22406	0.0255639	-0.171429	-0.0315789	-0.00601504	0.312782	-0.386466	-0.353383	0.309774	0.257143	0.312782	0.237594	-0.302256	0.153383	0.22406	0.166917	0.240602	0.169925	0.24812	0.282707	0.18797	0.293233	0.0917293	0.118797	0.230075	0.287218	0.234586	0.345865	0.215038	0.216541	0.233083	0.150376	0.18797	-0.196992	-0.165414
ｔ	-0.947895	0.0191399	-1.12186	-1.54848	0.255659	-0.798507	-0.153218	-0.764969	1.91009	0.0701886	-0.40375	1.23599	0.527176	-0.364998	0.975406	0.108494	-0.738238	-0.134045	-0.0255201	1.39712	-1.77776	-1.60269	1.38225	1.12893	1.39712	1.03774	-1.34529	0.658544	0.975406	0.718246	1.05168	0.731569	1.08667	1.25043	0.811962	1.30129	0.390822	0.507608	1.00303	1.27217	1.02384	1.5639	0.934182	0.941035	1.01689	0.645329	0.811962	-0.852473	-0.711593
p	0.355736	0.98494	0.276664	0.13891	0.801113	0.434986	0.879931	0.454203	0.0721872	0.944817	0.691153	0.232348	0.604509	0.719366	0.342286	0.914804	0.469886	0.894854	0.979921	0.179364	0.0923416	0.126407	0.183806	0.273751	0.179364	0.313131	0.195238	0.518524	0.342286	0.481825	0.306861	0.473849	0.291523	0.227153	0.427421	0.209571	0.700516	0.617892	0.329138	0.219504	0.319476	0.135252	0.362574	0.359146	0.322678	0.526855	0.427421	0.405152	0.485838
[truncated: 850 more columns]
