# Supplementary material for: Multi-Omics Analysis to Generate Hypotheses for Mild Health Problems in Monkeys
Source: Metabolites. 2021 Oct 13;11(10):701. doi: 10.3390/metabo11100701 (PMC8538200; doi:10.3390/metabo11100701)
Supplement: Supplementary file 1 [file metabolites-11-00701-s001.zip › Suppl_Table_S2_Urine-Metabolomics.xlsx]

## Sheet: Urine-Hydrophilic
Observed MW	110.084	221.105	97.0639	293.002	97.0639	279.114	84.0687	97.0639	123.08	775.224	701.205	370.094	849.242	518.131	354.062	627.186	298.054	339.116	166.048	340.112	553.168	306.128	457.413	280.171	474.392	240.067	298.142	340.334	459.262	358.308	284.271	436.185	418.329	428.219	298.251	394.285	354.277	206.167	260.108	278.096	144.042	414.203	90.0467	117.058	114.047	104.062	202.099	368.166	118.078
RT min	0.138	0.233	0.296	0.357	0.453	0.475	0.788	0.838	0.839	0.903	0.943	0.946	0.948	0.949	0.949	0.953	0.959	0.963	0.964	0.965	0.967	0.971	0.976	0.98	0.985	0.986	0.989	0.991	0.995	0.999	1.001	1.004	1.005	1.008	1.009	1.011	1.016	1.016	1.016	1.017	1.021	1.022	1.022	1.022	1.022	1.022	1.022	1.022	1.023
Monkey 1	26449.9	391976	54251.3	2113.43	75554.6	11310.1	78562.2	113518	110935	95344.9	84692.8	183305	41274.3	1.52833e+06	244677	401870	402256	81854.7	1.26591e+06	387678	1.5486e+06	117324	419616	406283	338776	2.15582e+06	4.07348e+06	652401	2.49587e+06	1.84855e+07	1.09449e+08	1.17022e+07	1.50374e+08	1.7228e+06	921278	1.42674e+07	1.27766e+06	680892	63844.1	729370	935957	1.30387e+09	4.39929e+07	1.3374e+07	8.9753e+06	7.51993e+06	593517	130697	1.78339e+08
Monkey 2	48048.2	167476	72005.9	8925.86	51144.6	4031.87	24925.5	92287.9	19811.8	61007.7	134132	336364	47725.4	538560	316627	259286	330197	5581.99	893949	5007.21	556499	5301.54	206673	41204.9	114875	1.3172e+06	1.10596e+06	181332	3.16097e+06	4.1409e+06	2.96574e+07	2.52811e+06	5.96409e+07	527897	266115	2.84649e+06	439388	266771	99497.1	4703.09	272359	5.47853e+08	1.85864e+07	5.42357e+06	3.66879e+06	2.9507e+06	181397	31431.1	7.56043e+07
Monkey 3	76426.3	220756	90218.8	8049.55	35588.5	3915.4	6347.85	45308.8	43788.6	84969.4	132060	429434	86705.8	1.15641e+06	380309	267837	377497	28164.6	1.18975e+06	154629	1.16231e+06	21258.9	233410	71883.5	155778	1.74455e+06	1.48337e+06	255733	2.29806e+06	5.64825e+06	3.86692e+07	3.20084e+06	8.5753e+07	706712	353731	3.73861e+06	813369	414641	174244	270687	474784	6.71552e+08	2.44674e+07	7.15472e+06	4.50049e+06	4.00658e+06	213877	1.36168e+06	9.77691e+07
Monkey 4	121058	416766	57923.9	42376.6	107997	18550.5	24071.2	65842.1	31398.3	138355	297126	896810	132598	2.93723e+06	770223	548359	879226	3.29811e+06	2.01169e+06	1.4522e+07	2.93814e+06	2.85389e+06	350053	13082.9	291863	3.71879e+06	2.60958e+06	456914	7.02937e+06	1.01908e+07	7.83621e+07	6.7924e+06	1.4604e+08	1.14541e+06	692414	6.50044e+06	1.44303e+06	627236	109762	3.02043e+06	943049	1.15018e+09	3.89705e+07	1.1517e+07	7.73589e+06	6.26427e+06	480180	203331	1.60699e+08
Monkey 5	33209.2	2.28211e+06	244706	248979	1.12239e+06	84908.7	132994	786085	271752	546589	1.24595e+06	4.11457e+06	536969	1.17955e+07	3.29924e+06	3.16591e+06	4.62798e+06	72339.1	1.26867e+07	69233.7	1.21354e+07	68704.7	2.58762e+06	444750	1.63241e+06	1.75138e+07	2.12246e+07	3.00168e+06	3.10324e+07	7.0714e+07	4.84996e+08	4.35731e+07	8.62974e+08	8.06718e+06	4.29744e+06	4.93916e+07	7.27941e+06	3.85027e+06	88317.5	60949.2	4.62632e+06	6.83124e+09	2.47332e+08	7.23423e+07	4.92175e+07	4.11023e+07	2.38777e+06	209548	9.91193e+08
Monkey 6	106379	326070	72501.8	26855.8	22572	4875.94	15732	46113.1	27421.5	65909.8	130846	505731	67947	2.43071e+06	408777	496878	531593	1.57173e+06	1.38623e+06	6.89636e+06	2.40968e+06	1.29504e+06	288951	8911.13	203271	1.88664e+06	1.91852e+06	319327	6.71141e+06	8.07808e+06	6.05283e+07	5.10064e+06	1.13148e+08	901868	498165	5.11445e+06	1.16887e+06	463118	170016	1.32354e+06	469170	9.85475e+08	3.19472e+07	9.3867e+06	6.26312e+06	4.86066e+06	392642	50197.4	1.39159e+08
Monkey 7	137662	579771	55508.6	62920.3	49956.2	3509.25	28609.9	78213.2	32684.1	260237	400587	1.09302e+06	248765	6.94258e+06	1.05327e+06	1.10261e+06	1.29077e+06	18456	3.07731e+06	17663.7	6.87652e+06	17528.8	646202	341535	389373	4.66231e+06	4.4142e+06	777214	1.05745e+07	1.20321e+07	1.15461e+08	9.9925e+06	2.08206e+08	2.05025e+06	1.10602e+06	7.32955e+06	1.99825e+06	1.11666e+06	59612.9	15550.1	1.39344e+06	1.84533e+09	6.21695e+07	1.91112e+07	1.17595e+07	9.50599e+06	715300	233142	2.62311e+08
Monkey 8	204170	770179	114228	55260.1	99095	30414	57041.8	291863	53978.6	170007	394107	1.12694e+06	221679	6.14723e+06	1.31021e+06	1.37375e+06	1.44374e+06	180457	4.38665e+06	943195	6.11277e+06	96707.1	742672	183110	523679	6.16765e+06	6.23068e+06	954534	1.93901e+06	2.0498e+07	1.50976e+08	1.26063e+07	2.82171e+08	2.82562e+06	1.2189e+06	1.49975e+07	2.79547e+06	1.27745e+06	81161.7	253161	1.62168e+06	2.36716e+09	7.9781e+07	2.26903e+07	1.55723e+07	1.24985e+07	779522	367403	3.12834e+08
Monkey 9	174153	739669	51218.8	80223.5	138229	294191	75384.1	193702	79545.4	251240	505139	1.37921e+06	304469	5.73275e+06	1.27743e+06	1.26749e+06	1.68599e+06	789816	4.61054e+06	3.28441e+06	5.70767e+06	1.03223e+06	664681	376789	424758	5.95168e+06	5.47338e+06	771965	1.66791e+07	1.79913e+07	1.26281e+08	1.27001e+07	2.53848e+08	2.41313e+06	1.31421e+06	1.30807e+07	2.5957e+06	1.28677e+06	91855.6	1.07507e+06	1.46047e+06	2.11386e+09	7.66764e+07	2.22411e+07	1.48781e+07	1.19022e+07	761048	124125	3.08853e+08
Monkey 10	7422.81	516874	150857	39736.4	150857	211288	22633.8	48367.8	51543.9	137175	290268	736940	183120	1.79243e+06	691519	492371	790542	310582	2.32316e+06	1.49312e+06	1.80234e+06	444146	426777	17540.1	226912	3.09242e+06	2.83251e+06	394926	1.4368e+07	8.80599e+06	6.72965e+07	6.47886e+06	1.28851e+08	974765	631522	6.34969e+06	1.0627e+06	740375	99785.4	1.02283e+06	693909	1.21033e+09	4.2925e+07	1.25907e+07	7.43318e+06	6.28318e+06	388400	186275	1.71663e+08
Monkey 11	66697.2	267511	27704.9	21579.7	23180	18732.4	7193.28	104343	40727.4	48765.6	147620	506176	89222.7	815812	322040	311157	389432	166008	964363	801800	827387	144563	215038	30544.5	139685	1.46557e+06	1.69993e+06	237331	8.14849e+06	4.89351e+06	4.03198e+07	3.11752e+06	7.85524e+07	661803	330680	3.413e+06	813226	524420	106567	818309	610841	7.89468e+08	2.67358e+07	7.87396e+06	5.41745e+06	4.47893e+06	228985	774258	1.08846e+08
Monkey 12	86081.9	340574	91955.2	87792.6	88767.9	8267.14	53480.6	47086.4	26866.9	85615.9	174556	560659	106918	3.68626e+06	560553	915119	736244	41874.9	1.61764e+06	189491	3.65676e+06	26991.8	339505	48760.9	254331	2.3428e+06	2.17358e+06	378671	3.41532e+06	7.5159e+06	5.95525e+07	4.37996e+06	1.22638e+08	785910	492497	4.92618e+06	1.1645e+06	594876	113030	504378	791003	1.10892e+09	3.65855e+07	1.12445e+07	7.13601e+06	5.62109e+06	289709	3.40983e+06	1.4622e+08
Monkey 13	120607	451291	67542.3	132125	34100.9	203008	26860.3	80150.4	37161.3	140502	370058	796403	150738	2.5752e+06	685585	672832	764911	69236.6	1.94463e+06	345059	2.63537e+06	28010	414077	16822.9	282183	3.12543e+06	3.67795e+06	511769	2.15564e+07	1.04861e+07	8.78806e+07	5.66975e+06	1.58839e+08	1.06554e+06	764217	6.80084e+06	1.773e+06	746458	97803.8	786775	994727	1.26826e+09	3.94223e+07	1.16083e+07	8.28971e+06	6.47762e+06	449682	687821	1.67352e+08
Monkey 14	116499	424437	35460.5	43967.1	90929.4	6017.73	21224.9	94848.5	29040.7	146578	310522	984901	125744	5.87869e+06	736419	1.14448e+06	1.1116e+06	117484	2.31698e+06	656457	5.74913e+06	41695.7	456253	28085.6	279335	4.00628e+06	3.27715e+06	481532	7.99105e+06	1.00244e+07	8.27829e+07	6.69785e+06	1.41203e+08	869242	663482	6.9714e+06	1.92777e+06	807789	100598	902724	944649	1.28296e+09	4.40828e+07	1.32063e+07	8.29399e+06	7.38289e+06	550846	413971	1.81092e+08
Monkey 15	496024	19463.8	259235	136750	259235	41460.8	215924	394702	155163	312609	727327	2.29716e+06	491076	1.37216e+07	2.02246e+06	2.96946e+06	2.90085e+06	35486.6	7.47354e+06	33963.2	1.3578e+07	33703.7	1.61041e+06	2.17083e+06	859141	1.03036e+07	1.31723e+07	1.43288e+06	2.45836e+07	4.06725e+07	2.71468e+08	2.64547e+07	4.74538e+08	5.39178e+06	2.27066e+06	2.92893e+07	5.53177e+06	2.48189e+06	32403.9	166361	2.35455e+06	4.4206e+09	1.48839e+08	4.72988e+07	3.03248e+07	2.57693e+07	1.58657e+06	235877	6.33939e+08
Monkey 16	153986	647678	58509.3	171991	55586	397332	106217	155870	54440.2	150019	365047	863373	159951	8.11359e+06	684445	1.97333e+06	1.33244e+06	137512	2.92419e+06	586891	7.99371e+06	115207	602809	13672.2	342695	4.95092e+06	5.52441e+06	774848	6.05629e+06	1.69466e+07	1.29249e+08	1.10777e+07	2.18779e+08	2.55298e+06	1.07418e+06	1.18572e+07	2.43207e+06	1.17686e+06	33878.8	926125	1.42432e+06	1.96939e+09	5.90001e+07	1.72e+07	1.18962e+07	9.4096e+06	546465	46946.1	2.58933e+08
Monkey 17	140144	584716	73957.2	35295.7	51427.6	2774	24808.2	28761.1	14586.7	141139	429533	1.06531e+06	249075	6.32392e+06	929718	1.5344e+06	1.2295e+06	35455.9	2.87982e+06	232812	6.19648e+06	38058.4	702684	22328.1	331227	3.80246e+06	3.71679e+06	516073	5.44492e+06	1.14496e+07	8.79406e+07	8.01785e+06	1.69659e+08	1.83961e+06	742363	7.48581e+06	2.12751e+06	1.05269e+06	109742	180160	1.17694e+06	1.69742e+09	5.49626e+07	1.5864e+07	1.05657e+07	9.17041e+06	621891	62173.1	2.25167e+08
Monkey 18	208755	883080	118159	69444.1	169482	437496	85843.6	194135	56279.3	212763	529795	1.5917e+06	283702	9.54572e+06	1.76429e+06	1.96896e+06	1.8145e+06	19148.5	4.26287e+06	61034.8	9.39604e+06	18186.4	783835	23518.7	482095	6.51138e+06	8.22438e+06	911661	2.10422e+06	2.2952e+07	1.69738e+08	1.51038e+07	2.77586e+08	1.82613e+06	1.30884e+06	1.52498e+07	3.77455e+06	1.50442e+06	50815	316033	1.33726e+06	2.67285e+09	8.38778e+07	2.48026e+07	1.6949e+07	1.3807e+07	817057	1.3999e+06	3.43675e+08
Monkey 19	152065	659540	138649	49895.8	55425.7	9858.4	29480.8	154539	33276.5	164292	263970	826689	170876	6.14738e+06	718499	1.42054e+06	1.05464e+06	54645.5	2.69907e+06	255633	6.02749e+06	38526.6	597456	107650	340402	3.32845e+06	4.20675e+06	517941	1.12929e+07	1.19981e+07	9.57781e+07	8.71835e+06	1.86463e+08	1.19643e+06	837187	7.99619e+06	2.23942e+06	1.21955e+06	120016	71137	993333	1.6717e+09	5.87246e+07	1.71839e+07	1.14816e+07	9.34618e+06	616453	251524	2.38948e+08
Monkey 20	386444	1.35871e+06	170973	72347.3	286361	8977.73	177572	621371	297230	397769	1.0413e+06	2.5672e+06	401620	1.86846e+07	2.11552e+06	4.90686e+06	3.02964e+06	323175	6.42711e+06	1.37113e+06	1.84226e+07	349056	1.90974e+06	54237.5	657214	1.16001e+07	1.14159e+07	1.07039e+06	1.93185e+07	2.76043e+07	2.02765e+08	2.28092e+07	4.14713e+08	3.97673e+06	1.63959e+06	1.96594e+07	4.4362e+06	2.61191e+06	57862.8	634440	3.01013e+06	4.15008e+09	1.26771e+08	3.79739e+07	2.34503e+07	1.86032e+07	1.17406e+06	183759	5.19723e+08
Pearson Correlation with Stool Water	0.0230867	0.321969	0.254814	0.0798793	0.285588	-0.267439	0.0414765	0.295713	0.238316	0.297571	0.304769	0.306841	0.291073	0.206836	0.309505	0.240087	0.272585	-0.12437	0.273577	-0.133208	0.212553	-0.122922	0.299605	-0.0770506	0.233275	0.267177	0.2049	0.218262	0.0884044	0.158937	0.188994	0.19209	0.249412	0.246986	0.203374	0.139646	0.163369	0.254493	0.154623	-0.37033	0.282647	0.253894	0.255727	0.247611	0.235447	0.225115	0.184348	0.192829	0.24558
ｔ	0.0979746	1.44283	1.11799	0.339985	1.2643	-1.17754	0.176121	1.31334	1.04108	1.32239	1.35761	1.3678	1.29081	0.896926	1.38093	1.04929	1.202	-0.531784	1.20673	-0.570237	0.922875	-0.525499	1.33232	-0.327873	1.01778	1.1763	0.888161	0.948885	0.376542	0.682993	0.816551	0.830433	1.0927	1.08138	0.88126	0.59833	0.702555	1.11648	0.663994	-1.69144	1.25014	1.11368	1.12227	1.08429	1.02781	0.980245	0.795761	0.833752	1.07482
p	0.923035	0.166245	0.278271	0.737803	0.222248	0.254316	0.862165	0.205564	0.311619	0.202596	0.191365	0.188211	0.213104	0.381598	0.184208	0.307928	0.24494	0.601378	0.243158	0.575567	0.368279	0.60565	0.199378	0.746791	0.322268	0.254799	0.386169	0.355246	0.710916	0.503308	0.424861	0.417173	0.288935	0.293805	0.389793	0.557074	0.49132	0.278898	0.51511	0.107993	0.227257	0.280069	0.276494	0.292546	0.317652	0.339958	0.43654	0.415348	0.296652
Spearman Correlation with Stool Water	-0.12782	0.0857143	0.293233	0.0135338	0.00601504	-0.398496	-0.00300752	-0.0646617	-0.0526316	0.075188	0.177444	0.156391	0.210526	0.0857143	0.184962	0.0135338	0.0661654	-0.245113	0.108271	-0.308271	0.0962406	-0.243609	0.0691729	0.267669	0.0195489	0.0315789	-0.0360902	0.00150376	0.0240602	-0.0796992	-0.0556391	-0.0616541	-0.00150376	0.0421053	-0.0330827	-0.123308	-0.043609	-0.0075188	0.0736842	-0.475188	0.0541353	-0.00300752	0.0180451	0.0195489	-0.0210526	0.00902256	0.0195489	0.0165414	0.0180451
ｔ	-0.546777	0.364998	1.30129	0.0574245	0.0255201	-1.84336	-0.0127599	-0.274911	-0.223607	0.319901	0.764969	0.671777	0.913664	0.364998	0.798507	0.0574245	0.281333	-1.07265	0.46207	-1.37484	0.410218	-1.06565	0.294181	1.17863	0.0829547	0.134045	-0.153218	0.00637992	0.102108	-0.339214	-0.236423	-0.262075	-0.00637992	0.178796	-0.140435	-0.527176	-0.185194	-0.0319005	0.313468	-2.29127	0.230014	-0.0127599	0.0765714	0.0829547	-0.0893386	0.038281	0.0829547	0.0701886	0.0765714
p	0.591246	0.719366	0.209571	0.95484	0.979921	0.0818054	0.98996	0.786515	0.825581	0.752727	0.454203	0.510257	0.37297	0.719366	0.434986	0.95484	0.781664	0.297601	0.649567	0.186056	0.686487	0.300668	0.771985	0.253892	0.934803	0.894854	0.879931	0.99498	0.9198	0.738374	0.815774	0.796239	0.99498	0.860095	0.889876	0.604509	0.855148	0.974903	0.757529	0.0342273	0.820675	0.98996	0.939809	0.934803	0.929799	0.969885	0.934803	0.944817	0.939809
[truncated: 2,871 more columns]
