# Supplementary material for: Multi-Omics Analysis to Generate Hypotheses for Mild Health Problems in Monkeys
Source: Metabolites. 2021 Oct 13;11(10):701. doi: 10.3390/metabo11100701 (PMC8538200; doi:10.3390/metabo11100701)
Supplement: Supplementary file 1 [file metabolites-11-00701-s001.zip › Suppl_Table_S4__HMDB-Feces-Metabolomics.xlsx]

## Sheet: HMDB-Feces-Hydrophiric-Identifi
query_mass	compound_id	compound_name	kegg_id	formula	monoisotopic_mass	adduct	adduct_type	adduct_m/z	delta(ppm)
97.9768	HMDB0000973	Phosphate	C00009	H3O4P	97.9769	M	0	97.9769	1
101.084	HMDB0012815	5-Aminopentanal	C12455	C5H11NO	101.084	M	0	101.084	2
101.084	HMDB0062600	N-butylformamide	n/a	C5H11NO	101.084	M	0	101.084	2
101.084	HMDB0172632	2-Piperidinol	n/a	C5H11NO	101.084	M	0	101.084	2
106.009	HMDB0031520	2-Mercaptopropanoic acid	n/a	C3H6O2S	106.009	M	0	106.009	1
106.009	HMDB0041604	3-Mercaptopropanoic acid	n/a	C3H6O2S	106.009	M	0	106.009	1
106.078	HMDB0059810	m-Xylene	C07208	C8H10	106.078	M	0	106.078	0
106.078	HMDB0059851	o-Xylene	C07212	C8H10	106.078	M	0	106.078	0
106.078	HMDB0059905	Ethylbenzene	C07111	C8H10	106.078	M	0	106.078	0
106.078	HMDB0059924	p-Xylene	C06756	C8H10	106.078	M	0	106.078	0
108.057	HMDB0001858	p-Cresol	C01468	C7H8O	108.058	M	0	108.058	1
108.057	HMDB0002048	m-Cresol	C01467	C7H8O	108.058	M	0	108.058	1
108.057	HMDB0002055	o-Cresol	C01542	C7H8O	108.058	M	0	108.058	1
108.057	HMDB0003119	Benzyl alcohol	C03485	C7H8O	108.058	M	0	108.058	1
108.057	HMDB0033895	Anisole	C01403	C7H8O	108.058	M	0	108.058	1
111.032	HMDB0004230	Pyrrole-2-carboxylic acid	C05942	C5H5NO2	111.032	M	0	111.032	2
111.032	HMDB0038175	2-Acetyloxazole	n/a	C5H5NO2	111.032	M	0	111.032	2
112.027	HMDB0000300	Uracil	C00106	C4H4N2O2	112.027	M	0	112.027	1
112.027	HMDB0060760	4-Carboxypyrazole	n/a	C4H4N2O2	112.027	M	0	112.027	1
113.084	HMDB0031199	2,5-Dihydro-2,4,5-trimethyloxazole	n/a	C6H11NO	113.084	M	0	113.084	2
113.084	HMDB0031702	1-Piperidinecarboxaldehyde	n/a	C6H11NO	113.084	M	0	113.084	2
113.084	HMDB0037293	2-Acetylpyrrolidine	n/a	C6H11NO	113.084	M	0	113.084	2
113.084	HMDB0062769	Epsilon-caprolactam	C06593	C6H11NO	113.084	M	0	113.084	2
114.043	HMDB0000076	Dihydrouracil	C00429	C4H6N2O2	114.043	M	0	114.043	0
114.043	HMDB0003646	N-Methylhydantoin	C02565	C4H6N2O2	114.043	M	0	114.043	0
114.043	HMDB0060245	L-3-Cyanoalanine	C02512	C4H6N2O2	114.043	M	0	114.043	0
116.095	HMDB0012176	5-Aminopentanamide	C00990	C5H12N2O	116.095	M	0	116.095	2
116.095	HMDB0062789	1,1,3,3-tetramethylurea	n/a	C5H12N2O	116.095	M	0	116.095	2
116.095	HMDB0163433	N-[(3-methylbutyl)imino]hydroxylamine	n/a	C5H12N2O	116.095	M	0	116.095	2
118.026	HMDB0000202	Methylmalonic acid	C02170	C4H6O4	118.027	M	0	118.027	1
118.026	HMDB0000254	Succinic acid	C00042	C4H6O4	118.027	M	0	118.027	1
118.026	HMDB0000349	Erythrono-1,4-lactone	n/a	C4H6O4	118.027	M	0	118.027	1
118.026	HMDB0000940	Threonolactone	n/a	C4H6O4	118.027	M	0	118.027	1
118.026	HMDB0031204	4-Hydroxy-2-oxobutanoic acid	n/a	C4H6O4	118.027	M	0	118.027	1
118.026	HMDB0039324	xi-3-Hydroxy-2-oxobutanoic acid	n/a	C4H6O4	118.027	M	0	118.027	1
118.026	HMDB0130020	3-methoxy-3-oxopropanoic acid	n/a	C4H6O4	118.027	M	0	118.027	1
118.026	HMDB0157670	2-hydroxy-4-oxobutanoic acid	n/a	C4H6O4	118.027	M	0	118.027	1
118.026	HMDB0187640	SCHEMBL7512234	n/a	C4H6O4	118.027	M	0	118.027	1
118.063	HMDB0000351	(2S,3R)-3-Hydroxy-2-methylbutanoic acid	n/a	C5H10O3	118.063	M	0	118.063	1
118.063	HMDB0000354	2-Methyl-3-hydroxybutyric acid	n/a	C5H10O3	118.063	M	0	118.063	1
118.063	HMDB0000396	2-Ethylhydracrylic acid	n/a	C5H10O3	118.063	M	0	118.063	1
118.063	HMDB0000410	3-Hydroxy-2-methyl-[S-(R,R)]-butanoic acid	n/a	C5H10O3	118.063	M	0	118.063	1
118.063	HMDB0000531	3-Hydroxyvaleric acid	n/a	C5H10O3	118.063	M	0	118.063	1
118.063	HMDB0000642	Erythronilic acid	n/a	C5H10O3	118.063	M	0	118.063	1
118.063	HMDB0000754	3-Hydroxyisovaleric acid	n/a	C5H10O3	118.063	M	0	118.063	1
118.063	HMDB0001863	2-Hydroxyvaleric acid	n/a	C5H10O3	118.063	M	0	118.063	1
118.063	HMDB0001987	2-Hydroxy-2-methylbutyric acid	n/a	C5H10O3	118.063	M	0	118.063	1
118.063	HMDB0002011	4-Hydroxyisovaleric acid	n/a	C5H10O3	118.063	M	0	118.063	1
118.063	HMDB0040735	Ethyl lactate	n/a	C5H10O3	118.063	M	0	118.063	1
118.063	HMDB0041603	Methyl-beta-hydroxybutyrate	n/a	C5H10O3	118.063	M	0	118.063	1
118.063	HMDB0059844	Diethyl carbonate	n/a	C5H10O3	118.063	M	0	118.063	1
118.063	HMDB0061927	5-Hydroxypentanoic acid	C02804	C5H10O3	118.063	M	0	118.063	1
118.063	HMDB0062057	4-hydroxy-valeric acid	n/a	C5H10O3	118.063	M	0	118.063	1
118.063	HMDB0062584	2-Hydroxy-3-methylbutyric acid	n/a	C5H10O3	118.063	M	0	118.063	1
118.063	HMDB0130836	4-hydroxy-2-methylbutanoic acid	n/a	C5H10O3	118.063	M	0	118.063	1
118.063	HMDB0172067	2-hydroxypropyl acetate	n/a	C5H10O3	118.063	M	0	118.063	1
118.063	HMDB0172068	3-hydroxypropyl Acetate	n/a	C5H10O3	118.063	M	0	118.063	1
118.063	HMDB0172069	Propyl glycolate	n/a	C5H10O3	118.063	M	0	118.063	1
122.048	HMDB0001406	Niacinamide	C00153	C6H6N2O	122.048	M	0	122.048	2
122.048	HMDB0031861	2-Acetylpyrazine	n/a	C6H6N2O	122.048	M	0	122.048	2
123.032	HMDB0001488	Nicotinic acid	C00253	C6H5NO2	123.032	M	0	123.032	1
123.032	HMDB0002243	Picolinic acid	C10164	C6H5NO2	123.032	M	0	123.032	1
123.032	HMDB0031713	2-Hydroxy-4-imino-2,5-cyclohexadienone	n/a	C6H5NO2	123.032	M	0	123.032	1
123.032	HMDB0041950	Nitrobenzene	C06813	C6H5NO2	123.032	M	0	123.032	1
123.032	HMDB0060665	Isonicotinic acid	C07446	C6H5NO2	123.032	M	0	123.032	1
134.021	HMDB0000156	L-Malic acid	C00149	C4H6O5	134.022	M	0	134.022	1
134.021	HMDB0000744	Malic acid	C03668	C4H6O5	134.022	M	0	134.022	1
134.021	HMDB0031518	D-Malic acid	C00497	C4H6O5	134.022	M	0	134.022	1
134.021	HMDB0032872	Velcorin	n/a	C4H6O5	134.022	M	0	134.022	1
136.038	HMDB0031160	1-Pentanesulfenothioic acid	n/a	C5H12S2	136.038	M	0	136.038	1
136.038	HMDB0033053	Ethyl propyl disulfide	n/a	C5H12S2	136.038	M	0	136.038	1
136.038	HMDB0033054	Ethyl isopropyl disulfide	n/a	C5H12S2	136.038	M	0	136.038	1
150.068	HMDB0000764	Hydrocinnamic acid	C05629	C9H10O2	150.068	M	0	150.068	1
150.068	HMDB0002097	4-Ethylbenzoic acid	n/a	C9H10O2	150.068	M	0	150.068	1
150.068	HMDB0002222	3-Methylphenylacetic acid	n/a	C9H10O2	150.068	M	0	150.068	1
150.068	HMDB0002237	3,4-Dimethylbenzoic acid	n/a	C9H10O2	150.068	M	0	150.068	1
150.068	HMDB0003654	4-Coumaryl alcohol	C02646	C9H10O2	150.068	M	0	150.068	1
150.068	HMDB0011743	2-Phenylpropionate	n/a	C9H10O2	150.068	M	0	150.068	1
150.068	HMDB0013744	2-Methoxy-4-vinylphenol	C17883	C9H10O2	150.068	M	0	150.068	1
150.068	HMDB0031310	Benzyl acetate	C15513	C9H10O2	150.068	M	0	150.068	1
150.068	HMDB0032073	o-Tolyl acetate	n/a	C9H10O2	150.068	M	0	150.068	1
150.068	HMDB0032075	p-Tolyl acetate	C01963	C9H10O2	150.068	M	0	150.068	1
150.068	HMDB0032569	2'-Methoxyacetophenone	n/a	C9H10O2	150.068	M	0	150.068	1
150.068	HMDB0032570	4'-Methoxyacetophenone	n/a	C9H10O2	150.068	M	0	150.068	1
150.068	HMDB0032592	2'-Hydroxy-5'-methylacetophenone	n/a	C9H10O2	150.068	M	0	150.068	1
150.068	HMDB0032617	Methyl phenylacetate	n/a	C9H10O2	150.068	M	0	150.068	1
150.068	HMDB0033967	Ethyl benzoate	C01839	C9H10O2	150.068	M	0	150.068	1
150.068	HMDB0033970	4-Ethoxybenzaldehyde	n/a	C9H10O2	150.068	M	0	150.068	1
150.068	HMDB0037715	1-Phenylethyl formate	n/a	C9H10O2	150.068	M	0	150.068	1
150.068	HMDB0038355	2-Ethyl-4-(2-furanyl)-2-propenal	n/a	C9H10O2	150.068	M	0	150.068	1
150.068	HMDB0040428	2-Phenylethyl formate	n/a	C9H10O2	150.068	M	0	150.068	1
150.068	HMDB0040925	2-(2-Furanyl)-3-methyl-2-butenal	n/a	C9H10O2	150.068	M	0	150.068	1
150.068	HMDB0059824	4-Hydroxy-3-methylacetophenone	n/a	C9H10O2	150.068	M	0	150.068	1
150.068	HMDB0062349	4-Chromanol	n/a	C9H10O2	150.068	M	0	150.068	1
150.068	HMDB0125532	3-ethenyl-5-methoxyphenol	n/a	C9H10O2	150.068	M	0	150.068	1
150.068	HMDB0134026	3-(2-hydroxyphenyl)propanal	n/a	C9H10O2	150.068	M	0	150.068	1
150.068	HMDB0134027	2-(3-hydroxyprop-1-en-1-yl)phenol	n/a	C9H10O2	150.068	M	0	150.068	1
150.068	HMDB0135239	4-(prop-2-en-1-yl)benzene-1,2-diol	n/a	C9H10O2	150.068	M	0	150.068	1
150.068	HMDB0135276	2-hydroxy-3-phenylpropanal	n/a	C9H10O2	150.068	M	0	150.068	1
150.068	HMDB0135277	3-hydroxy-3-phenylpropanal	n/a	C9H10O2	150.068	M	0	150.068	1
150.068	HMDB0135278	3-(3-hydroxyphenyl)propanal	n/a	C9H10O2	150.068	M	0	150.068	1
150.068	HMDB0135279	3-(4-hydroxyphenyl)propanal	C16706	C9H10O2	150.068	M	0	150.068	1
150.068	HMDB0135280	3-[(1E)-3-hydroxyprop-1-en-1-yl]phenol	n/a	C9H10O2	150.068	M	0	150.068	1
150.068	HMDB0135281	(3-phenyloxiran-2-yl)methanol	n/a	C9H10O2	150.068	M	0	150.068	1
150.068	HMDB0135644	4-(3-hydroxyprop-1-en-1-yl)phenol	n/a	C9H10O2	150.068	M	0	150.068	1
150.068	HMDB0146635	4-vinyl-3-methoxyphenol	n/a	C9H10O2	150.068	M	0	150.068	1
150.068	HMDB0146657	2-hydroxycinnamyl alcohol	n/a	C9H10O2	150.068	M	0	150.068	1
150.068	HMDB0170763	4-(oxiran-2-ylmethyl)phenol	n/a	C9H10O2	150.068	M	0	150.068	1
150.068	HMDB0170980	4-[(1Z)-prop-1-en-1-yl]benzene-1,2-diol	n/a	C9H10O2	150.068	M	0	150.068	1
150.068	HMDB0176418	2-Nonene-4,6-diyne-1,9-diol	n/a	C9H10O2	150.068	M	0	150.068	1
150.068	HMDB0176419	6-(3-methyloxiran-2-yl)hexa-3,5-diyn-1-ol	n/a	C9H10O2	150.068	M	0	150.068	1
150.068	HMDB0177508	4-(3-methyloxiran-2-yl)phenol	n/a	C9H10O2	150.068	M	0	150.068	1
152.033	HMDB0000292	Xanthine	C00385	C5H4N4O2	152.033	M	0	152.033	1
152.033	HMDB0000786	Oxypurinol	C07599	C5H4N4O2	152.033	M	0	152.033	1
152.033	HMDB0001182	6,8-Dihydroxypurine	n/a	C5H4N4O2	152.033	M	0	152.033	1
153.042	HMDB0001476	3-Hydroxyanthranilic acid	C00632	C7H7NO3	153.043	M	0	153.043	2
153.042	HMDB0001972	3-Aminosalicylic acid	n/a	C7H7NO3	153.043	M	0	153.043	2
153.042	HMDB0014378	Aminosalicylic Acid	C02518	C7H7NO3	153.043	M	0	153.043	2
153.042	HMDB0014389	Mesalazine	n/a	C7H7NO3	153.043	M	0	153.043	2
153.042	HMDB0059749	6-Methoxy-pyridine-3-carboxylic acid	n/a	C7H7NO3	153.043	M	0	153.043	2
153.042	HMDB0059811	2-Nitro-p-cresol	n/a	C7H7NO3	153.043	M	0	153.043	2
153.042	HMDB0164041	2-(hydroxyamino)benzoic acid	C16235	C7H7NO3	153.043	M	0	153.043	2
153.042	HMDB0177404	4-(Hydroxyamino)benzoic acid	n/a	C7H7NO3	153.043	M	0	153.043	2
153.079	HMDB0000073	Dopamine	C03758	C8H11NO2	153.079	M	0	153.079	2
153.079	HMDB0004825	p-Octopamine	C04227	C8H11NO2	153.079	M	0	153.079	2
153.079	HMDB0012309	Vanillylamine	C16666	C8H11NO2	153.079	M	0	153.079	2
153.079	HMDB0060277	Dopamine	C03758	C8H11NO2	153.079	M	0	153.079	2
153.09	HMDB0013253	N-Acetylhistamine	C05135	C7H11N3O	153.09	M	0	153.09	2
159.089	HMDB0000339	2-Methylbutyrylglycine	n/a	C7H13NO3	159.09	M	0	159.09	2
159.089	HMDB0000678	Isovalerylglycine	n/a	C7H13NO3	159.09	M	0	159.09	2
159.089	HMDB0000927	Valerylglycine	n/a	C7H13NO3	159.09	M	0	159.09	2
159.089	HMDB0011757	N-Acetylvaline	n/a	C7H13NO3	159.09	M	0	159.09	2
159.089	HMDB0012154	3-Dehydrocarnitine	C02636	C7H13NO3	159.09	M	0	159.09	2
159.089	HMDB0012175	5-Acetamidovalerate	C03087	C7H13NO3	159.09	M	0	159.09	2
159.089	HMDB0029230	4-Hydroxystachydrine	n/a	C7H13NO3	159.09	M	0	159.09	2
159.089	HMDB0029409	Turicine	n/a	C7H13NO3	159.09	M	0	159.09	2
159.089	HMDB0029412	Betonicine	C08269	C7H13NO3	159.09	M	0	159.09	2
159.089	HMDB0031345	Calystegine A6	n/a	C7H13NO3	159.09	M	0	159.09	2
159.089	HMDB0036384	Calystegine A7	n/a	C7H13NO3	159.09	M	0	159.09	2
159.089	HMDB0038593	Calystegin A3	n/a	C7H13NO3	159.09	M	0	159.09	2
159.089	HMDB0038625	Medicanine	n/a	C7H13NO3	159.09	M	0	159.09	2
159.089	HMDB0061678	Methyl 5-(hydroxymethyl)pyrrolidine-3-carboxylate	n/a	C7H13NO3	159.09	M	0	159.09	2
161.047	HMDB0002285	2-Indolecarboxylic acid	n/a	C9H7NO2	161.048	M	0	161.048	2
161.047	HMDB0003320	Indole-3-carboxylic acid	C19837	C9H7NO2	161.048	M	0	161.048	2
161.047	HMDB0004077	4,6-Dihydroxyquinoline	C05639	C9H7NO2	161.048	M	0	161.048	2
161.047	HMDB0031172	3-Formyl-6-hydroxyindole	n/a	C9H7NO2	161.048	M	0	161.048	2
161.047	HMDB0060289	Quinoline-4,8-diol	C05637	C9H7NO2	161.048	M	0	161.048	2
161.047	HMDB0240311	quinoline-2,8-diol	C06342	C9H7NO2	161.048	M	0	161.048	2
163.063	HMDB0001424	4-(3-Pyridyl)-3-butenoic acid	n/a	C9H9NO2	163.063	M	0	163.063	0
163.063	HMDB0004186	3-Methyldioxyindole	C05834	C9H9NO2	163.063	M	0	163.063	0
163.063	HMDB0062406	4-oxo-4-(pyridin-3-yl)butanal	C19567	C9H9NO2	163.063	M	0	163.063	0
164.068	HMDB0000174	alpha-L-Fucose	C01019	C6H12O5	164.068	M	0	164.068	0
164.068	HMDB0000849	Rhamnose	C00507	C6H12O5	164.068	M	0	164.068	0
164.068	HMDB0002712	1,5-Anhydrosorbitol	C07326	C6H12O5	164.068	M	0	164.068	0
164.068	HMDB0003081	beta-D-Fucose	C02095	C6H12O5	164.068	M	0	164.068	0
164.068	HMDB0005876	3-Deoxyfructose	n/a	C6H12O5	164.068	M	0	164.068	0
164.068	HMDB0010207	UNII-5HJQ8VCB2N	C00861	C6H12O5	164.068	M	0	164.068	0
164.068	HMDB0012327	2-Deoxygalactopyranose	C02781	C6H12O5	164.068	M	0	164.068	0
164.068	HMDB0029196	D-Fucose	C01018	C6H12O5	164.068	M	0	164.068	0
164.068	HMDB0033821	2-O-Methyl-D-xylose	n/a	C6H12O5	164.068	M	0	164.068	0
164.068	HMDB0059625	beta-L-Fucose	n/a	C6H12O5	164.068	M	0	164.068	0
164.068	HMDB0060267	L-Fuculose	C01721	C6H12O5	164.068	M	0	164.068	0
164.068	HMDB0062477	2-Deoxyglucose	n/a	C6H12O5	164.068	M	0	164.068	0
164.068	HMDB0062489	L-Fucose-1P	n/a	C6H12O5	164.068	M	0	164.068	0
164.068	HMDB0124735	ﾎｲ-L-fucopyranose	n/a	C6H12O5	164.068	M	0	164.068	0
164.068	HMDB0240304	alpha-D-rhamnose	C01684	C6H12O5	164.068	M	0	164.068	0
165.065	HMDB0000897	7-Methylguanine	C02242	C6H7N5O	165.065	M	0	165.065	2
165.065	HMDB0001566	3-Methylguanine	C02230	C6H7N5O	165.065	M	0	165.065	2
165.065	HMDB0003282	1-Methylguanine	C04152	C6H7N5O	165.065	M	0	165.065	2
165.065	HMDB0006040	N2-Methylguanine	C04153	C6H7N5O	165.065	M	0	165.065	2
167.058	HMDB0001545	Pyridoxal	C00250	C8H9NO3	167.058	M	0	167.058	2
167.058	HMDB0004290	Isopyridoxal	C06051	C8H9NO3	167.058	M	0	167.058	2
167.058	HMDB0034887	3alpha,4,5,7alpha-Tetrahydro-5-hydroxy-1H-isoindole-1,3(2H)-dione	n/a	C8H9NO3	167.058	M	0	167.058	2
167.058	HMDB0034889	3alpha,4,7,7alpha-Tetrahydro-4-hydroxy-1H-isoindole-1,3(2H)-dione	n/a	C8H9NO3	167.058	M	0	167.058	2
167.058	HMDB0060374	3-Methoxyanthranilate	C05831	C8H9NO3	167.058	M	0	167.058	2
167.058	HMDB0167786	Tetrahydrophthalimide epoxide	n/a	C8H9NO3	167.058	M	0	167.058	2
167.058	HMDB0167787	3,7a-dihydroxy-3a,4,7,7a-tetrahydro-1H-isoindol-1-one	n/a	C8H9NO3	167.058	M	0	167.058	2
167.058	HMDB0181253	Tetrahydro-1H-isoindole-1,3,5(2H,6H)-trione	n/a	C8H9NO3	167.058	M	0	167.058	2
167.058	HMDB0181280	octahydroisoindoletrione	n/a	C8H9NO3	167.058	M	0	167.058	2
167.058	HMDB0240370	2-hydroxy-n-(2-hydroxyphenyl)acetamide	n/a	C8H9NO3	167.058	M	0	167.058	2
168.001	HMDB0015320	Desflurane	C07519	C3H2F6O	168.001	M	0	168.001	1
168.001	HMDB0060648	Hexafluoroisopropanol	n/a	C3H2F6O	168.001	M	0	168.001	1
169.11	HMDB0038321	Homoarecoline	n/a	C9H15NO2	169.11	M	0	169.11	2
169.11	HMDB0176882	2-hydroxy-9-methyl-9-azabicyclo[3.3.1]nonan-3-one	n/a	C9H15NO2	169.11	M	0	169.11	2
169.11	HMDB0176883	1-hydroxy-9-methyl-9-azabicyclo[3.3.1]nonan-3-one	n/a	C9H15NO2	169.11	M	0	169.11	2
169.11	HMDB0176884	9-methyl-9-aza-bicyclo[3.3.1]nonan-3-one-9-oxide	n/a	C9H15NO2	169.11	M	0	169.11	2
187.12	HMDB0013010	N-Heptanoylglycine	n/a	C9H17NO3	187.121	M	0	187.121	2
187.12	HMDB0240687	7-Keto-8-Aminopelargonic Acid	C01092	C9H17NO3	187.121	M	0	187.121	2
189.1	HMDB0036604	N-Methylcalystegine B2	n/a	C8H15NO4	189.1	M	0	189.1	2
189.1	HMDB0062181	N-lactoyl-Valine	n/a	C8H15NO4	189.1	M	0	189.1	2
189.1	HMDB0094718	1-hydroxyhexanoylglycine	n/a	C8H15NO4	189.1	M	0	189.1	2
189.1	HMDB0094719	2-[(1,2-dihydroxyhexylidene)amino]acetic acid	n/a	C8H15NO4	189.1	M	0	189.1	2
189.1	HMDB0094720	2-[(1,3-dihydroxyhexylidene)amino]acetic acid	n/a	C8H15NO4	189.1	M	0	189.1	2
189.1	HMDB0094721	2-[(1,4-dihydroxyhexylidene)amino]acetic acid	n/a	C8H15NO4	189.1	M	0	189.1	2
189.1	HMDB0094722	2-[(1,5-dihydroxyhexylidene)amino]acetic acid	n/a	C8H15NO4	189.1	M	0	189.1	2
189.1	HMDB0240627	1-Carboxyethylvaline	n/a	C8H15NO4	189.1	M	0	189.1	2
194.094	HMDB0031517	(R)-3-Hydroxy-5-phenylpentanoic acid	n/a	C11H14O3	194.094	M	0	194.094	1
194.094	HMDB0031984	2,5-Dimethoxy-4-(2-propenyl)phenol	n/a	C11H14O3	194.094	M	0	194.094	1
194.094	HMDB0032575	Butylparaben	n/a	C11H14O3	194.094	M	0	194.094	1
194.094	HMDB0032590	Zingerone	C17497	C11H14O3	194.094	M	0	194.094	1
194.094	HMDB0034206	Ethyl 4-methylphenoxyacetate	n/a	C11H14O3	194.094	M	0	194.094	1
194.094	HMDB0034990	4-Methoxybenzyl propanoate	n/a	C11H14O3	194.094	M	0	194.094	1
194.094	HMDB0036432	Isobutyl salicylate	n/a	C11H14O3	194.094	M	0	194.094	1
194.094	HMDB0037271	2,6-Dimethoxy-4-(1-propenyl)phenol	n/a	C11H14O3	194.094	M	0	194.094	1
194.094	HMDB0040730	Butyl salicylate	n/a	C11H14O3	194.094	M	0	194.094	1
194.094	HMDB0041194	Methoxyeugenol	n/a	C11H14O3	194.094	M	0	194.094	1
194.094	HMDB0041505	5-Hydroxy-2-benzyl-1,3-dioxane	n/a	C11H14O3	194.094	M	0	194.094	1
194.094	HMDB0041506	2-Benzyl-5-hydroxymethyl-1,3-dioxolane	n/a	C11H14O3	194.094	M	0	194.094	1
194.094	HMDB0041666	3-Hydroxyphenyl-valeric acid	n/a	C11H14O3	194.094	M	0	194.094	1
194.094	HMDB0059898	Ethyl 4-ethoxybenzoate	n/a	C11H14O3	194.094	M	0	194.094	1
194.094	HMDB0059940	[2-(2-Methylphenyl)-1,3-dioxolan-4-yl]methanol	n/a	C11H14O3	194.094	M	0	194.094	1
194.094	HMDB0059941	[2-(3-Methylphenyl)-1,3-dioxolan-4-yl]methanol	n/a	C11H14O3	194.094	M	0	194.094	1
194.094	HMDB0059942	[2-(4-Methylphenyl)-1,3-dioxolan-4-yl]methanol	n/a	C11H14O3	194.094	M	0	194.094	1
194.094	HMDB0059943	2-(2-Methylphenyl)-1,3-dioxan-5-ol	n/a	C11H14O3	194.094	M	0	194.094	1
194.094	HMDB0059944	2-(3-Methylphenyl)-1,3-dioxan-5-ol	n/a	C11H14O3	194.094	M	0	194.094	1
194.094	HMDB0059945	2-(4-Methylphenyl)-1,3-dioxan-5-ol	n/a	C11H14O3	194.094	M	0	194.094	1
194.094	HMDB0062055	4-hydroxy-5-phenylpentanoic acid	n/a	C11H14O3	194.094	M	0	194.094	1
194.094	HMDB0124918	2-(3-methylbut-2-en-1-yl)benzene-1,3,5-triol	n/a	C11H14O3	194.094	M	0	194.094	1
194.094	HMDB0126161	2-(4-hydroxy-3-methylbut-2-en-1-yl)benzene-1,3-diol	n/a	C11H14O3	194.094	M	0	194.094	1
194.094	HMDB0126162	3-(3-methylbut-2-en-1-yl)benzene-1,2,4-triol	n/a	C11H14O3	194.094	M	0	194.094	1
194.094	HMDB0126163	2-[(3,3-dimethyloxiran-2-yl)methyl]benzene-1,3-diol	n/a	C11H14O3	194.094	M	0	194.094	1
194.094	HMDB0126262	2-[(2E)-4-hydroxy-3-methylbut-2-en-1-yl]benzene-1,3-diol	n/a	C11H14O3	194.094	M	0	194.094	1
194.094	HMDB0126462	2-[(1E)-3-hydroxy-3-methylbut-1-en-1-yl]benzene-1,3-diol	n/a	C11H14O3	194.094	M	0	194.094	1
194.094	HMDB0126463	3-[(1E)-3-methylbut-1-en-1-yl]benzene-1,2,4-triol	n/a	C11H14O3	194.094	M	0	194.094	1
194.094	HMDB0126464	2-[(1E)-3-methylbut-1-en-1-yl]benzene-1,3,5-triol	n/a	C11H14O3	194.094	M	0	194.094	1
194.094	HMDB0126465	2-[3-(propan-2-yl)oxiran-2-yl]benzene-1,3-diol	n/a	C11H14O3	194.094	M	0	194.094	1
194.094	HMDB0126466	2-[(1E)-4-hydroxy-3-methylbut-1-en-1-yl]benzene-1,3-diol	n/a	C11H14O3	194.094	M	0	194.094	1
194.094	HMDB0132270	5-(4-hydroxyphenyl)pentanoic acid	n/a	C11H14O3	194.094	M	0	194.094	1
194.094	HMDB0133190	4-[(2E)-4-hydroxy-3-methylbut-2-en-1-yl]benzene-1,3-diol	n/a	C11H14O3	194.094	M	0	194.094	1
194.094	HMDB0133191	4-(4-hydroxy-3-methylbut-2-en-1-yl)benzene-1,3-diol	n/a	C11H14O3	194.094	M	0	194.094	1
194.094	HMDB0133192	4-(3-methylbut-2-en-1-yl)benzene-1,2,3-triol	n/a	C11H14O3	194.094	M	0	194.094	1
194.094	HMDB0133193	5-(3-methylbut-2-en-1-yl)benzene-1,2,4-triol	n/a	C11H14O3	194.094	M	0	194.094	1
194.094	HMDB0133194	4-[(3,3-dimethyloxiran-2-yl)methyl]benzene-1,3-diol	n/a	C11H14O3	194.094	M	0	194.094	1
194.094	HMDB0133463	4-(3-hydroxybut-1-en-1-yl)-2-methoxyphenol	n/a	C11H14O3	194.094	M	0	194.094	1
194.094	HMDB0133484	3-hydroxy-4-(3-methoxyphenyl)butan-2-one	n/a	C11H14O3	194.094	M	0	194.094	1
194.094	HMDB0133515	4-(3-hydroxy-5-methoxyphenyl)butan-2-one	n/a	C11H14O3	194.094	M	0	194.094	1
194.094	HMDB0133538	1-hydroxy-4-(3-methoxyphenyl)butan-2-one	n/a	C11H14O3	194.094	M	0	194.094	1
194.094	HMDB0141323	4-hydroxy-4-(3-methoxyphenyl)butan-2-one	n/a	C11H14O3	194.094	M	0	194.094	1
194.094	HMDB0146411	3-(3-Methoxyphenyl)-2-methylpropanoic acid	n/a	C11H14O3	194.094	M	0	194.094	1
194.094	HMDB0151228	3-hydroxy-3-(4-methoxyphenyl)-2-methylpropanal	n/a	C11H14O3	194.094	M	0	194.094	1
194.094	HMDB0151229	3-(4-methoxyphenyl)-2-methylpropanoic acid	n/a	C11H14O3	194.094	M	0	194.094	1
194.094	HMDB0151230	3-hydroxy-2-[(4-methoxyphenyl)methyl]propanal	n/a	C11H14O3	194.094	M	0	194.094	1
194.094	HMDB0151232	2-hydroxy-3-(4-methoxyphenyl)-2-methylpropanal	n/a	C11H14O3	194.094	M	0	194.094	1
194.094	HMDB0151233	2-(4-methoxybenzylidene)propane-1,3-diol	n/a	C11H14O3	194.094	M	0	194.094	1
194.094	HMDB0151235	2-(3-hydroxy-2-methylprop-1-en-1-yl)-5-methoxyphenol	n/a	C11H14O3	194.094	M	0	194.094	1
194.094	HMDB0151236	[3-(4-methoxyphenyl)-2-methyloxiran-2-yl]methanol	n/a	C11H14O3	194.094	M	0	194.094	1
194.094	HMDB0163606	3-hydroxy-3-methyl-2-phenylbutanoic acid	n/a	C11H14O3	194.094	M	0	194.094	1
194.094	HMDB0163607	4-hydroxy-3-methyl-2-phenylbutanoic acid	n/a	C11H14O3	194.094	M	0	194.094	1
194.094	HMDB0163609	2-hydroxy-3-methyl-2-phenylbutanoic acid	n/a	C11H14O3	194.094	M	0	194.094	1
194.094	HMDB0163610	SCHEMBL8733687	n/a	C11H14O3	194.094	M	0	194.094	1
194.094	HMDB0163611	2-(4-hydroxyphenyl)-3-methylbutanoic acid	n/a	C11H14O3	194.094	M	0	194.094	1
194.094	HMDB0163612	AKOS022917042	n/a	C11H14O3	194.094	M	0	194.094	1
194.094	HMDB0164132	(4r)-hydroxy-4-(4'-methoxyphenyl)-butan-2-one	n/a	C11H14O3	194.094	M	0	194.094	1
194.094	HMDB0164133	SCHEMBL13742814	n/a	C11H14O3	194.094	M	0	194.094	1
194.094	HMDB0164134	2-Butanone, 4-hydroxy-4-(4-methoxyphenyl)-	n/a	C11H14O3	194.094	M	0	194.094	1
194.094	HMDB0166268	76773-99-4	n/a	C11H14O3	194.094	M	0	194.094	1
194.094	HMDB0171010	cis-4-Propenylsyringol	n/a	C11H14O3	194.094	M	0	194.094	1
194.094	HMDB0179740	gamma-Methoxyisoeugenol	n/a	C11H14O3	194.094	M	0	194.094	1
194.094	HMDB0182834	4-hydroxybenzyl butyrate	n/a	C11H14O3	194.094	M	0	194.094	1
197.068	HMDB0000181	L-Dopa	C00355	C9H11NO4	197.069	M	0	197.069	2
197.068	HMDB0000609	DL-Dopa	C00355	C9H11NO4	197.069	M	0	197.069	2
197.068	HMDB0038336	2-Hydroxy-3-(3,4-dihydroxyphenyl)propanamide	n/a	C9H11NO4	197.069	M	0	197.069	2
197.068	HMDB0038750	N-Hydroxy-L-tyrosine	n/a	C9H11NO4	197.069	M	0	197.069	2
197.116	HMDB0029422	L-Histidine trimethylbetaine	C05575	C9H15N3O2	197.116	M	0	197.116	1
198.02	HMDB0130804	3-methyl-4-(sulfooxy)butanoic acid	n/a	C5H10O6S	198.02	M	0	198.02	1
198.02	HMDB0130807	3-methyl-2-(sulfooxy)butanoic acid	n/a	C5H10O6S	198.02	M	0	198.02	1
198.02	HMDB0130842	2-methyl-3-(sulfooxy)butanoic acid	n/a	C5H10O6S	198.02	M	0	198.02	1
198.02	HMDB0130847	2-[(sulfooxy)methyl]butanoic acid	n/a	C5H10O6S	198.02	M	0	198.02	1
198.02	HMDB0130850	2-methyl-4-(sulfooxy)butanoic acid	n/a	C5H10O6S	198.02	M	0	198.02	1
198.02	HMDB0159994	3-(sulfooxy)pentanoic acid	n/a	C5H10O6S	198.02	M	0	198.02	1
198.02	HMDB0172071	{[1-(acetyloxy)propan-2-yl]oxy}sulfonic acid	n/a	C5H10O6S	198.02	M	0	198.02	1
198.02	HMDB0172073	SCHEMBL16160715	n/a	C5H10O6S	198.02	M	0	198.02	1
198.02	HMDB0172075	(2-oxo-2-propoxyethoxy)sulfonic acid	n/a	C5H10O6S	198.02	M	0	198.02	1
203.079	HMDB0062715	2-[(1-hydroxyethylidene)amino]hexanedioic acid	n/a	C8H13NO5	203.079	M	0	203.079	2
205.131	HMDB0004231	Dexpanthenol	C05944	C9H19NO4	205.131	M	0	205.131	2
207.053	HMDB0000978	4-(2-Aminophenyl)-2,4-dioxobutanoic acid	C01252	C10H9NO4	207.053	M	0	207.053	1
207.053	HMDB0060328	1-Nitro-5,6-dihydroxy-dihydronaphthalene	C14801	C10H9NO4	207.053	M	0	207.053	1
207.053	HMDB0161402	67615-73-0	n/a	C10H9NO4	207.053	M	0	207.053	1
207.053	HMDB0161403	67615-74-1	n/a	C10H9NO4	207.053	M	0	207.053	1
207.053	HMDB0161404	2-(4,5-dihydroxy-1H-indol-3-yl)acetic acid	n/a	C10H9NO4	207.053	M	0	207.053	1
207.053	HMDB0161405	2-hydroxy-2-(5-hydroxy-1H-indol-3-yl)acetic acid	n/a	C10H9NO4	207.053	M	0	207.053	1
207.053	HMDB0176481	SCHEMBL2878152	n/a	C10H9NO4	207.053	M	0	207.053	1
207.053	HMDB0176482	2-(5-hydroxy-2-oxoindolin-3-yl)acetic acid	n/a	C10H9NO4	207.053	M	0	207.053	1
207.053	HMDB0176483	7-hydroxy-2-oxindole-3-acetic acid	n/a	C10H9NO4	207.053	M	0	207.053	1
207.053	HMDB0176484	SCHEMBL3338745	n/a	C10H9NO4	207.053	M	0	207.053	1
207.053	HMDB0176485	Dioxindole-3-acetic acid	n/a	C10H9NO4	207.053	M	0	207.053	1
207.053	HMDB0176486	2-hydroxy-2-(2-hydroxy-3H-indol-3-yl)acetic acid	n/a	C10H9NO4	207.053	M	0	207.053	1
212.141	HMDB0029388	Cucurbic acid	n/a	C12H20O3	212.141	M	0	212.141	1
212.141	HMDB0033601	Dihydrojasmonic acid	n/a	C12H20O3	212.141	M	0	212.141	1
212.141	HMDB0035085	Vulgarole	n/a	C12H20O3	212.141	M	0	212.141	1
212.141	HMDB0037326	Traumatin	C16309	C12H20O3	212.141	M	0	212.141	1
212.141	HMDB0041572	3-Ethenyl-4-hydroxy-2,5-dimethylhex-5-en-2-yl acetate	n/a	C12H20O3	212.141	M	0	212.141	1
212.995	HMDB0159997	2-{[1-hydroxy-2-(sulfooxy)ethylidene]amino}acetic acid	n/a	C4H7NO7S	212.994	M	0	212.994	2
215.115	HMDB0013124	Propenoylcarnitine	n/a	C10H17NO4	215.116	M	0	215.116	1
215.115	HMDB0094732	2-[(carboxymethyl)amino]oct-2-enoic acid	n/a	C10H17NO4	215.116	M	0	215.116	1
215.115	HMDB0094733	2-[(carboxymethyl)amino]oct-3-enoic acid	n/a	C10H17NO4	215.116	M	0	215.116	1
215.115	HMDB0094734	2-[(carboxymethyl)amino]oct-4-enoic acid	n/a	C10H17NO4	215.116	M	0	215.116	1
215.115	HMDB0094735	2-[(carboxymethyl)amino]oct-5-enoic acid	n/a	C10H17NO4	215.116	M	0	215.116	1
215.115	HMDB0094736	2-[(carboxymethyl)amino]oct-6-enoic acid	n/a	C10H17NO4	215.116	M	0	215.116	1
215.115	HMDB0094737	1-hydroxyoct-7-enoylglycine	n/a	C10H17NO4	215.116	M	0	215.116	1
215.115	HMDB0094738	2-[(2-hydroxy-1-oxooct-1-en-3-yl)amino]acetic acid	n/a	C10H17NO4	215.116	M	0	215.116	1
215.115	HMDB0094739	2-[(1,2-dihydroxyoct-2-en-1-ylidene)amino]acetic acid	n/a	C10H17NO4	215.116	M	0	215.116	1
215.115	HMDB0094740	2-[(1,2-dihydroxyoct-3-en-1-ylidene)amino]acetic acid	n/a	C10H17NO4	215.116	M	0	215.116	1
215.115	HMDB0094741	2-[(1,2-dihydroxyoct-4-en-1-ylidene)amino]acetic acid	n/a	C10H17NO4	215.116	M	0	215.116	1
215.115	HMDB0094742	2-[(1,2-dihydroxyoct-5-en-1-ylidene)amino]acetic acid	n/a	C10H17NO4	215.116	M	0	215.116	1
215.115	HMDB0094743	2-[(1,2-dihydroxyoct-6-en-1-ylidene)amino]acetic acid	n/a	C10H17NO4	215.116	M	0	215.116	1
215.115	HMDB0094744	2-hydroxyoct-7-enoylglycine	n/a	C10H17NO4	215.116	M	0	215.116	1
215.115	HMDB0094745	2-[(3-hydroxy-1-oxooct-1-en-2-yl)amino]acetic acid	n/a	C10H17NO4	215.116	M	0	215.116	1
215.115	HMDB0094746	2-[(1,3-dihydroxyoct-2-en-1-ylidene)amino]acetic acid	n/a	C10H17NO4	215.116	M	0	215.116	1
215.115	HMDB0094747	2-[(1,3-dihydroxyoct-3-en-1-ylidene)amino]acetic acid	n/a	C10H17NO4	215.116	M	0	215.116	1
215.115	HMDB0094748	2-[(1,3-dihydroxyoct-4-en-1-ylidene)amino]acetic acid	n/a	C10H17NO4	215.116	M	0	215.116	1
215.115	HMDB0094749	2-[(1,3-dihydroxyoct-5-en-1-ylidene)amino]acetic acid	n/a	C10H17NO4	215.116	M	0	215.116	1
215.115	HMDB0094750	2-[(1,3-dihydroxyoct-6-en-1-ylidene)amino]acetic acid	n/a	C10H17NO4	215.116	M	0	215.116	1
215.115	HMDB0094751	3-hydroxyoct-7-enoylglycine	n/a	C10H17NO4	215.116	M	0	215.116	1
215.115	HMDB0094752	2-[(4-hydroxy-1-oxooct-1-en-2-yl)amino]acetic acid	n/a	C10H17NO4	215.116	M	0	215.116	1
215.115	HMDB0094753	2-[(1,4-dihydroxyoct-2-en-1-ylidene)amino]acetic acid	n/a	C10H17NO4	215.116	M	0	215.116	1
215.115	HMDB0094754	2-[(1,4-dihydroxyoct-3-en-1-ylidene)amino]acetic acid	n/a	C10H17NO4	215.116	M	0	215.116	1
215.115	HMDB0094755	2-[(1,4-dihydroxyoct-4-en-1-ylidene)amino]acetic acid	n/a	C10H17NO4	215.116	M	0	215.116	1
215.115	HMDB0094756	2-[(1,4-dihydroxyoct-5-en-1-ylidene)amino]acetic acid	n/a	C10H17NO4	215.116	M	0	215.116	1
215.115	HMDB0094757	2-[(1,4-dihydroxyoct-6-en-1-ylidene)amino]acetic acid	n/a	C10H17NO4	215.116	M	0	215.116	1
215.115	HMDB0094758	4-hydroxyoct-7-enoylglycine	n/a	C10H17NO4	215.116	M	0	215.116	1
215.115	HMDB0094759	2-[(5-hydroxy-1-oxooct-1-en-2-yl)amino]acetic acid	n/a	C10H17NO4	215.116	M	0	215.116	1
215.115	HMDB0094760	2-[(1,5-dihydroxyoct-2-en-1-ylidene)amino]acetic acid	n/a	C10H17NO4	215.116	M	0	215.116	1
215.115	HMDB0094761	2-[(1,5-dihydroxyoct-3-en-1-ylidene)amino]acetic acid	n/a	C10H17NO4	215.116	M	0	215.116	1
215.115	HMDB0094762	2-[(1,5-dihydroxyoct-4-en-1-ylidene)amino]acetic acid	n/a	C10H17NO4	215.116	M	0	215.116	1
215.115	HMDB0094763	2-[(1,5-dihydroxyoct-5-en-1-ylidene)amino]acetic acid	n/a	C10H17NO4	215.116	M	0	215.116	1
215.115	HMDB0094764	2-[(1,5-dihydroxyoct-6-en-1-ylidene)amino]acetic acid	n/a	C10H17NO4	215.116	M	0	215.116	1
215.115	HMDB0094765	5-hydroxyoct-7-enoylglycine	n/a	C10H17NO4	215.116	M	0	215.116	1
215.115	HMDB0094766	2-[(6-hydroxy-1-oxooct-1-en-2-yl)amino]acetic acid	n/a	C10H17NO4	215.116	M	0	215.116	1
215.115	HMDB0094767	2-[(1,6-dihydroxyoct-2-en-1-ylidene)amino]acetic acid	n/a	C10H17NO4	215.116	M	0	215.116	1
215.115	HMDB0094768	2-[(1,6-dihydroxyoct-3-en-1-ylidene)amino]acetic acid	n/a	C10H17NO4	215.116	M	0	215.116	1
215.115	HMDB0094769	2-[(1,6-dihydroxyoct-4-en-1-ylidene)amino]acetic acid	n/a	C10H17NO4	215.116	M	0	215.116	1
215.115	HMDB0094770	2-[(1,6-dihydroxyoct-5-en-1-ylidene)amino]acetic acid	n/a	C10H17NO4	215.116	M	0	215.116	1
215.115	HMDB0094771	2-[(1,6-dihydroxyoct-6-en-1-ylidene)amino]acetic acid	n/a	C10H17NO4	215.116	M	0	215.116	1
215.115	HMDB0094772	6-hydroxyoct-7-enoylglycine	n/a	C10H17NO4	215.116	M	0	215.116	1
215.115	HMDB0094773	2-[(7-hydroxy-1-oxooct-1-en-2-yl)amino]acetic acid	n/a	C10H17NO4	215.116	M	0	215.116	1
215.115	HMDB0094774	2-[(1,7-dihydroxyoct-2-en-1-ylidene)amino]acetic acid	n/a	C10H17NO4	215.116	M	0	215.116	1
215.115	HMDB0094775	2-[(1,7-dihydroxyoct-3-en-1-ylidene)amino]acetic acid	n/a	C10H17NO4	215.116	M	0	215.116	1
215.115	HMDB0094776	2-[(1,7-dihydroxyoct-4-en-1-ylidene)amino]acetic acid	n/a	C10H17NO4	215.116	M	0	215.116	1
215.115	HMDB0094777	2-[(1,7-dihydroxyoct-5-en-1-ylidene)amino]acetic acid	n/a	C10H17NO4	215.116	M	0	215.116	1
215.115	HMDB0094778	2-[(1,7-dihydroxyoct-6-en-1-ylidene)amino]acetic acid	n/a	C10H17NO4	215.116	M	0	215.116	1
215.115	HMDB0094779	7-hydroxyoct-7-enoylglycine	n/a	C10H17NO4	215.116	M	0	215.116	1
215.152	HMDB0013279	N-Nonanoylglycine	n/a	C11H21NO3	215.152	M	0	215.152	2
218.105	HMDB0001238	N-Acetylserotonin	C00978	C12H14N2O2	218.106	M	0	218.106	2
218.105	HMDB0014673	Mephenytoin	n/a	C12H14N2O2	218.106	M	0	218.106	2
218.105	HMDB0014932	Primidone	C07371	C12H14N2O2	218.106	M	0	218.106	2
218.105	HMDB0240319	N(alpha)-methyl-L-tryptophan	C02983	C12H14N2O2	218.106	M	0	218.106	2
218.126	HMDB0014515	Meprobamate	n/a	C9H18N2O4	218.127	M	0	218.127	2
218.126	HMDB0028916	Isoleucyl-Serine	n/a	C9H18N2O4	218.127	M	0	218.127	2
218.126	HMDB0028938	Leucyl-Serine	n/a	C9H18N2O4	218.127	M	0	218.127	2
218.126	HMDB0029042	Serylisoleucine	n/a	C9H18N2O4	218.127	M	0	218.127	2
218.126	HMDB0029043	Serylleucine	n/a	C9H18N2O4	218.127	M	0	218.127	2
218.126	HMDB0029074	Thr-Val	n/a	C9H18N2O4	218.127	M	0	218.127	2
218.126	HMDB0029137	(2S)-2-{[(2S)-2-amino-1-hydroxy-3-methylbutylidene]amino}-3-hydroxybutanoic acid	n/a	C9H18N2O4	218.127	M	0	218.127	2
218.126	HMDB0033675	L-Lysopine	n/a	C9H18N2O4	218.127	M	0	218.127	2
218.126	HMDB0041313	Pantothenamide	n/a	C9H18N2O4	218.127	M	0	218.127	2
218.126	HMDB0240346	6-N-carboxyethyllysine	n/a	C9H18N2O4	218.127	M	0	218.127	2
219.11	HMDB0000210	Pantothenic acid	C00864	C9H17NO5	219.111	M	0	219.111	2
221.141	HMDB0030305	Dioscorine	C10142	C13H19NO2	221.142	M	0	221.142	2
221.141	HMDB0060850	N,N,O-Tridesmethyltramadol	n/a	C13H19NO2	221.142	M	0	221.142	2
222.1	HMDB0028848	Glycyl-Phenylalanine	n/a	C11H14N2O3	222.1	M	0	222.1	2
222.1	HMDB0028995	Phe-Gly	n/a	C11H14N2O3	222.1	M	0	222.1	2
225.1	HMDB0142154	(2S)-2-amino-3-(4-hydroxy-3-methoxyphenyl)-2-methylpropanoic acid	n/a	C11H15NO4	225.1	M	0	225.1	1
229.131	HMDB0013126	Butenylcarnitine	n/a	C11H19NO4	229.131	M	0	229.131	2
246.085	HMDB0000497	5,6-Dihydrouridine	n/a	C9H14N2O6	246.085	M	0	246.085	2
246.085	HMDB0011160	Aspartylhydroxyproline	n/a	C9H14N2O6	246.085	M	0	246.085	2
246.085	HMDB0028754	Aspartyl-Hydroxyproline	n/a	C9H14N2O6	246.085	M	0	246.085	2
247.142	HMDB0013127	(3S)-3-{[(3R)-3-hydroxybutanoyl]oxy}-4-(trimethylazaniumyl)butanoate	n/a	C11H21NO5	247.142	M	0	247.142	2
247.142	HMDB0062735	(R)-3-hydroxybutyrylcarnitine	n/a	C11H21NO5	247.142	M	0	247.142	2
258.183	HMDB0000872	Tetradecanedioic acid	n/a	C14H26O4	258.183	M	0	258.183	1
258.183	HMDB0040429	Diethyl decanedioate	n/a	C14H26O4	258.183	M	0	258.183	1
258.183	HMDB0041618	Diisobutyl adipate	C14260	C14H26O4	258.183	M	0	258.183	1
258.183	HMDB0059946	2-Hydroxypropyl 2-isopropyl-5-methylcyclohexyl carbonate	n/a	C14H26O4	258.183	M	0	258.183	1
258.183	HMDB0059947	1-Hydroxypropan-2-yl 2-isopropyl-5-methylcyclohexyl carbonate	n/a	C14H26O4	258.183	M	0	258.183	1
258.183	HMDB0176325	13-hydroxy-3-oxotetradecanoic acid	n/a	C14H26O4	258.183	M	0	258.183	1
258.183	HMDB0176326	14-hydroxy-3-oxotetradecanoic acid	n/a	C14H26O4	258.183	M	0	258.183	1
258.183	HMDB0176327	SCHEMBL8201086	n/a	C14H26O4	258.183	M	0	258.183	1
258.183	HMDB0176328	4-hydroxy-3-oxotetradecanoic acid	n/a	C14H26O4	258.183	M	0	258.183	1
262.142	HMDB0031897	Phaseolic acid	n/a	C12H22O6	262.142	M	0	262.142	0
266.126	HMDB0029005	Phenylalanyl-Threonine	n/a	C13H18N2O4	266.127	M	0	266.127	2
266.126	HMDB0029068	(2S)-2-{[(2S,3R)-2-amino-1,3-dihydroxybutylidene]amino}-3-phenylpropanoic acid	n/a	C13H18N2O4	266.127	M	0	266.127	2
266.126	HMDB0033598	N5-(4-Methoxybenzyl)glutamine	n/a	C13H18N2O4	266.127	M	0	266.127	2
266.126	HMDB0139575	(2E)-N-(4-amino-2,3-dihydroxybutyl)-3-(4-hydroxyphenyl)prop-2-enimidic acid	n/a	C13H18N2O4	266.127	M	0	266.127	2
266.126	HMDB0139576	(2E)-N-(4-amino-2-hydroxybutyl)-3-(2,4-dihydroxyphenyl)prop-2-enimidic acid	n/a	C13H18N2O4	266.127	M	0	266.127	2
266.126	HMDB0139577	N-(4-amino-2-hydroxybutyl)-3-(4-hydroxyphenyl)oxirane-2-carboximidic acid	n/a	C13H18N2O4	266.127	M	0	266.127	2
266.126	HMDB0139703	N-(4-amino-2-hydroxybutyl)-3-(3,4-dihydroxyphenyl)prop-2-enimidic acid	n/a	C13H18N2O4	266.127	M	0	266.127	2
270.121	HMDB0029428	Hypoglycin B	C08280	C12H18N2O5	270.122	M	0	270.122	2
270.121	HMDB0061318	5-(1,2-dihydroxycyclohexyl)-6-hydroxy-3,5-dimethyl-2,3,4,5-tetrahydropyrimidine-2,4-dione	n/a	C12H18N2O5	270.122	M	0	270.122	2
275.111	HMDB0005766	Norophthalmic acid	n/a	C10H17N3O6	275.112	M	0	275.112	2
275.111	HMDB0011738	N2-gamma-Glutamylglutamine	C05283	C10H17N3O6	275.112	M	0	275.112	2
275.111	HMDB0028796	Glutaminylglutamic acid	n/a	C10H17N3O6	275.112	M	0	275.112	2
275.111	HMDB0028817	Glutamylglutamine	n/a	C10H17N3O6	275.112	M	0	275.112	2
275.111	HMDB0028833	Glutamyl-Gamma-glutamate	n/a	C10H17N3O6	275.112	M	0	275.112	2
275.111	HMDB0029147	N-gamma-Glutamylglutamine	n/a	C10H17N3O6	275.112	M	0	275.112	2
276.183	HMDB0015555	Molindone	C07230	C16H24N2O2	276.184	M	0	276.184	2
276.183	HMDB0061010	Noralfentanil	n/a	C16H24N2O2	276.184	M	0	276.184	2
278.224	HMDB0001388	alpha-Linolenic acid	C06427	C18H30O2	278.225	M	0	278.225	1
278.224	HMDB0003073	gamma-Linolenic acid	C06426	C18H30O2	278.225	M	0	278.225	1
278.224	HMDB0030962	Calendic acid	n/a	C18H30O2	278.225	M	0	278.225	1
278.224	HMDB0030963	alpha-Eleostearic acid	n/a	C18H30O2	278.225	M	0	278.225	1
278.224	HMDB0030964	Linolenelaidic acid	n/a	C18H30O2	278.225	M	0	278.225	1
278.224	HMDB0160594	(z,z)-9,12,17-octadecatrienoic acid	n/a	C18H30O2	278.225	M	0	278.225	1
278.224	HMDB0173892	(9E,12Z)-octadeca-9,12,17-trienoic acid	n/a	C18H30O2	278.225	M	0	278.225	1
278.224	HMDB0175402	(5E,9Z)-7-hydroxy-6,10,14-trimethylpentadeca-5,9,13-trien-2-one	n/a	C18H30O2	278.225	M	0	278.225	1
278.224	HMDB0175403	(5Z,9Z)-6-(hydroxymethyl)-10,14-dimethylpentadeca-5,9,13-trien-2-one	n/a	C18H30O2	278.225	M	0	278.225	1
278.224	HMDB0175404	(5E,9Z)-11-hydroxy-6,10,14-trimethylpentadeca-5,9,13-trien-2-one	n/a	C18H30O2	278.225	M	0	278.225	1
278.224	HMDB0175405	(5E,9E)-10-(hydroxymethyl)-6,14-dimethylpentadeca-5,9,13-trien-2-one	n/a	C18H30O2	278.225	M	0	278.225	1
278.224	HMDB0175406	(5E,9Z)-15-hydroxy-6,10,14-trimethylpentadeca-5,9,13-trien-2-one	n/a	C18H30O2	278.225	M	0	278.225	1
278.224	HMDB0175407	(5E,9Z,13E)-15-hydroxy-6,10,14-trimethylpentadeca-5,9,13-trien-2-one	n/a	C18H30O2	278.225	M	0	278.225	1
278.224	HMDB0175408	(5E,9Z)-4-hydroxy-6,10,14-trimethylpentadeca-5,9,13-trien-2-one	n/a	C18H30O2	278.225	M	0	278.225	1
278.224	HMDB0175409	(5E,9Z)-8-hydroxy-6,10,14-trimethylpentadeca-5,9,13-trien-2-one	n/a	C18H30O2	278.225	M	0	278.225	1
278.224	HMDB0175410	(5E,9Z)-12-hydroxy-6,10,14-trimethylpentadeca-5,9,13-trien-2-one	n/a	C18H30O2	278.225	M	0	278.225	1
278.224	HMDB0175411	4-{3-[(3Z)-4,8-dimethylnona-3,7-dien-1-yl]-3-methyloxiran-2-yl}butan-2-one	n/a	C18H30O2	278.225	M	0	278.225	1
278.224	HMDB0175412	(5E)-6-methyl-8-[3-methyl-3-(4-methylpent-3-en-1-yl)oxiran-2-yl]oct-5-en-2-one	n/a	C18H30O2	278.225	M	0	278.225	1
278.224	HMDB0175413	(5E,9Z)-12-(3,3-dimethyloxiran-2-yl)-6,10-dimethyldodeca-5,9-dien-2-one	n/a	C18H30O2	278.225	M	0	278.225	1
278.224	HMDB0175414	(5E,9Z)-1-hydroxy-6,10,14-trimethylpentadeca-5,9,13-trien-2-one	n/a	C18H30O2	278.225	M	0	278.225	1
278.224	HMDB0175415	(5E,9Z)-3-hydroxy-6,10,14-trimethylpentadeca-5,9,13-trien-2-one	n/a	C18H30O2	278.225	M	0	278.225	1
280.24	HMDB0000673	Linoleic acid	C01595	C18H32O2	280.24	M	0	280.24	2
280.24	HMDB0003797	Bovinic acid	C04056	C18H32O2	280.24	M	0	280.24	2
280.24	HMDB0005047	9E,11E-Octadecadienoic acid	n/a	C18H32O2	280.24	M	0	280.24	2
280.24	HMDB0005048	10E,12Z-Octadecadienoic acid	n/a	C18H32O2	280.24	M	0	280.24	2
280.24	HMDB0006270	Linoelaidic acid	n/a	C18H32O2	280.24	M	0	280.24	2
280.24	HMDB0029800	Mangiferic acid	n/a	C18H32O2	280.24	M	0	280.24	2
280.24	HMDB0030430	Linalyl caprylate	n/a	C18H32O2	280.24	M	0	280.24	2
280.24	HMDB0031051	Ethyl 2E,4Z-hexadecadienoate	n/a	C18H32O2	280.24	M	0	280.24	2
280.24	HMDB0031097	5-Octadecynoic acid	n/a	C18H32O2	280.24	M	0	280.24	2
280.24	HMDB0061864	Dihomolinoleic acid	n/a	C18H32O2	280.24	M	0	280.24	2
280.24	HMDB0062238	(6Z,9Z)-octadecadienoic acid	n/a	C18H32O2	280.24	M	0	280.24	2
280.24	HMDB0062784	Octadecadienoate	n/a	C18H32O2	280.24	M	0	280.24	2
289.127	HMDB0005765	Ophthalmic acid	n/a	C11H19N3O6	289.127	M	0	289.127	2
290.131	HMDB0040916	2-(4-Methyl-3-pentenyl)anthraquinone	n/a	C20H18O2	290.131	M	0	290.131	0
290.131	HMDB0060517	trans-3,4-Dihydro-3,4-dihydroxy-7,12-dimethylbenz[a]anthracene	C19490	C20H18O2	290.131	M	0	290.131	0
290.131	HMDB0060519	trans-5,6-Dihydro-5,6-dihydroxy-7,12-dimethylbenz[a]anthracene	C19607	C20H18O2	290.131	M	0	290.131	0
294.183	HMDB0005783	Gingerol	C10462	C17H26O4	294.183	M	0	294.183	2
294.183	HMDB0034779	Nordihydrocapsiate	n/a	C17H26O4	294.183	M	0	294.183	2
294.183	HMDB0035722	Tanacetol A	n/a	C17H26O4	294.183	M	0	294.183	2
294.183	HMDB0035754	Phytuberin	C09709	C17H26O4	294.183	M	0	294.183	2
294.183	HMDB0040646	Myrsinone	n/a	C17H26O4	294.183	M	0	294.183	2
294.183	HMDB0180101	(3,4-dihydroxyphenyl)methyl 8-methylnonanoate	n/a	C17H26O4	294.183	M	0	294.183	2
296.173	HMDB0139662	N-(4-aminobutyl)-3-(4-hydroxy-3,5-dimethoxyphenyl)propanimidic acid	n/a	C15H24N2O4	296.174	M	0	296.174	2
296.173	HMDB0139700	N-(4-aminobutyl)-3-(3-hydroxy-4,5-dimethoxyphenyl)propanimidic acid	n/a	C15H24N2O4	296.174	M	0	296.174	2
296.271	HMDB0013622	10Z-Nonadecenoic acid	n/a	C19H36O2	296.272	M	0	296.272	1
296.271	HMDB0035575	4,6-Nonadecanedione	n/a	C19H36O2	296.272	M	0	296.272	1
296.271	HMDB0175445	SCHEMBL7563427	n/a	C19H36O2	296.272	M	0	296.272	1
296.271	HMDB0175446	6-hydroxy-6,10,14-trimethyl-2-methylidenepentadecanal	n/a	C19H36O2	296.272	M	0	296.272	1
296.271	HMDB0175447	10-hydroxy-6,10,14-trimethyl-2-methylidenepentadecanal	n/a	C19H36O2	296.272	M	0	296.272	1
296.271	HMDB0175448	14-hydroxy-6,10,14-trimethyl-2-methylidenepentadecanal	n/a	C19H36O2	296.272	M	0	296.272	1
296.271	HMDB0175449	3-hydroxy-6,10,14-trimethyl-2-methylidenepentadecanal	n/a	C19H36O2	296.272	M	0	296.272	1
296.271	HMDB0175450	2-(4,8,12-trimethyltridecyl)oxirane-2-carbaldehyde	n/a	C19H36O2	296.272	M	0	296.272	1
296.271	HMDB0175451	6-(hydroxymethyl)-10,14-dimethyl-2-methylidenepentadecanal	n/a	C19H36O2	296.272	M	0	296.272	1
296.271	HMDB0175452	10-(hydroxymethyl)-6,14-dimethyl-2-methylidenepentadecanal	n/a	C19H36O2	296.272	M	0	296.272	1
296.271	HMDB0175453	15-hydroxy-6,10,14-trimethyl-2-methylidenepentadecanal	n/a	C19H36O2	296.272	M	0	296.272	1
298.084	HMDB0029512	4',5-Dihydroxy-7-methoxy-6-methylflavone	n/a	C17H14O5	298.084	M	0	298.084	1
298.084	HMDB0030718	Sayanedin	C10527	C17H14O5	298.084	M	0	298.084	1
298.084	HMDB0038811	Alfalone	n/a	C17H14O5	298.084	M	0	298.084	1
298.084	HMDB0128582	7-hydroxy-5,6-dimethoxy-2-phenyl-4H-chromen-4-one	n/a	C17H14O5	298.084	M	0	298.084	1
298.084	HMDB0130361	3-(3-hydroxy-4-methoxyphenyl)-7-methoxy-4H-chromen-4-one	n/a	C17H14O5	298.084	M	0	298.084	1
298.084	HMDB0130362	3-(3,4-dimethoxyphenyl)-7-hydroxy-4H-chromen-4-one	n/a	C17H14O5	298.084	M	0	298.084	1
298.084	HMDB0130368	6-hydroxy-7-methoxy-3-(3-methoxyphenyl)-4H-chromen-4-one	n/a	C17H14O5	298.084	M	0	298.084	1
298.084	HMDB0130392	8-hydroxy-7-methoxy-3-(3-methoxyphenyl)-4H-chromen-4-one	n/a	C17H14O5	298.084	M	0	298.084	1
298.084	HMDB0130396	5-hydroxy-7-methoxy-3-(3-methoxyphenyl)-4H-chromen-4-one	n/a	C17H14O5	298.084	M	0	298.084	1
298.084	HMDB0130762	3-(2-hydroxyphenyl)-5,7-dimethoxy-4H-chromen-4-one	n/a	C17H14O5	298.084	M	0	298.084	1
298.084	HMDB0130763	6-hydroxy-5,7-dimethoxy-3-phenyl-4H-chromen-4-one	n/a	C17H14O5	298.084	M	0	298.084	1
298.084	HMDB0130766	3-(3-hydroxyphenyl)-5,7-dimethoxy-4H-chromen-4-one	n/a	C17H14O5	298.084	M	0	298.084	1
298.084	HMDB0130767	3-(4-hydroxyphenyl)-5,7-dimethoxy-4H-chromen-4-one	n/a	C17H14O5	298.084	M	0	298.084	1
298.084	HMDB0130898	3-(3-hydroxy-5-methoxyphenyl)-7-methoxy-4H-chromen-4-one	n/a	C17H14O5	298.084	M	0	298.084	1
298.084	HMDB0130900	2-(2-hydroxyphenyl)-5,6-dimethoxy-4H-chromen-4-one	n/a	C17H14O5	298.084	M	0	298.084	1
298.084	HMDB0130903	2-(3-hydroxyphenyl)-5,6-dimethoxy-4H-chromen-4-one	n/a	C17H14O5	298.084	M	0	298.084	1
298.084	HMDB0130904	2-(4-hydroxyphenyl)-5,6-dimethoxy-4H-chromen-4-one	n/a	C17H14O5	298.084	M	0	298.084	1
298.084	HMDB0132452	2-(4-hydroxyphenyl)-5,7-dimethoxy-4H-chromen-4-one	n/a	C17H14O5	298.084	M	0	298.084	1
298.084	HMDB0132453	7-hydroxy-5-methoxy-2-(4-methoxyphenyl)-4H-chromen-4-one	n/a	C17H14O5	298.084	M	0	298.084	1
298.084	HMDB0132454	5-hydroxy-7-methoxy-2-(4-methoxyphenyl)-4H-chromen-4-one	C10019	C17H14O5	298.084	M	0	298.084	1
298.084	HMDB0132849	7-hydroxy-6-methoxy-3-(4-methoxyphenyl)-4H-chromen-4-one	C10199	C17H14O5	298.084	M	0	298.084	1
298.084	HMDB0140449	2-(4-hydroxy-3,5-dimethoxyphenyl)-4H-chromen-4-one	n/a	C17H14O5	298.084	M	0	298.084	1
298.084	HMDB0140450	2-(3-hydroxy-4,5-dimethoxyphenyl)-4H-chromen-4-one	n/a	C17H14O5	298.084	M	0	298.084	1
298.084	HMDB0140455	2-(3,5-dimethoxyphenyl)-7-hydroxy-4H-chromen-4-one	n/a	C17H14O5	298.084	M	0	298.084	1
298.084	HMDB0140462	2-(3,5-dimethoxyphenyl)-6-hydroxy-4H-chromen-4-one	n/a	C17H14O5	298.084	M	0	298.084	1
298.084	HMDB0140475	2-(3,5-dimethoxyphenyl)-5-hydroxy-4H-chromen-4-one	n/a	C17H14O5	298.084	M	0	298.084	1
298.084	HMDB0150242	14004-55-8	n/a	C17H14O5	298.084	M	0	298.084	1
298.084	HMDB0150662	2'-hydroxy-5,7-dimethoxyflavone	n/a	C17H14O5	298.084	M	0	298.084	1
298.084	HMDB0150663	6-hydroxy-5,7-dimethoxy-2-phenyl-4H-chromen-4-one	n/a	C17H14O5	298.084	M	0	298.084	1
298.084	HMDB0150665	2-(3-hydroxyphenyl)-5,7-dimethoxy-4H-chromen-4-one	n/a	C17H14O5	298.084	M	0	298.084	1
298.084	HMDB0151412	5,6-dihydroxy-3-methoxy-8-methyl-2-phenyl-4H-chromen-4-one	n/a	C17H14O5	298.084	M	0	298.084	1
298.084	HMDB0151706	5-hydroxy-2-(2-hydroxyphenyl)-7-methoxy-6-methyl-4H-chromen-4-one	n/a	C17H14O5	298.084	M	0	298.084	1
298.084	HMDB0151707	5-hydroxy-6-(hydroxymethyl)-7-methoxy-2-phenyl-4H-chromen-4-one	n/a	C17H14O5	298.084	M	0	298.084	1
298.084	HMDB0151708	5-hydroxy-2-(3-hydroxyphenyl)-7-methoxy-6-methyl-4H-chromen-4-one	n/a	C17H14O5	298.084	M	0	298.084	1
298.084	HMDB0151987	5-hydroxy-6-methoxy-2-(3-methoxyphenyl)-4H-chromen-4-one	n/a	C17H14O5	298.084	M	0	298.084	1
298.084	HMDB0151988	6-hydroxy-5-methoxy-2-(3-methoxyphenyl)-4H-chromen-4-one	n/a	C17H14O5	298.084	M	0	298.084	1
298.084	HMDB0151999	5-Hydroxy-6,2'-dimethoxyflavone	n/a	C17H14O5	298.084	M	0	298.084	1
298.084	HMDB0152000	6-hydroxy-5-methoxy-2-(2-methoxyphenyl)-4H-chromen-4-one	n/a	C17H14O5	298.084	M	0	298.084	1
298.084	HMDB0153244	7-o-methylwogonin	n/a	C17H14O5	298.084	M	0	298.084	1
298.084	HMDB0170880	4-hydroxy-2,5-bis(4-hydroxyphenyl)cyclopentane-1,3-dione	n/a	C17H14O5	298.084	M	0	298.084	1
298.084	HMDB0170886	3,4-dihydroxy-2,5-bis(4-hydroxyphenyl)cyclopent-2-en-1-one	n/a	C17H14O5	298.084	M	0	298.084	1
298.084	HMDB0170887	2,4-dihydroxy-3,5-bis(4-hydroxyphenyl)cyclopent-2-en-1-one	n/a	C17H14O5	298.084	M	0	298.084	1
302.079	HMDB0005782	Hesperetin	C01709	C16H14O6	302.079	M	0	302.079	0
302.079	HMDB0029491	Isoferreirin	n/a	C16H14O6	302.079	M	0	302.079	0
302.079	HMDB0030746	5,7,3'-Trihydroxy-4'-methoxyflavanone	n/a	C16H14O6	302.079	M	0	302.079	0
302.079	HMDB0031657	Ferreirin	C10419	C16H14O6	302.079	M	0	302.079	0
302.079	HMDB0031912	Porric acid A	n/a	C16H14O6	302.079	M	0	302.079	0
302.079	HMDB0032245	Divanillin	n/a	C16H14O6	302.079	M	0	302.079	0
302.079	HMDB0035616	3,3',4,4'-Tetrahydroxy-2-methoxychalcone	n/a	C16H14O6	302.079	M	0	302.079	0
302.079	HMDB0037507	Folerogenin	n/a	C16H14O6	302.079	M	0	302.079	0
302.079	HMDB0039377	2,3',6-Trihydroxy-4'-methoxybenzylcoumaranone	n/a	C16H14O6	302.079	M	0	302.079	0
302.079	HMDB0040316	Blumeatin	n/a	C16H14O6	302.079	M	0	302.079	0
302.079	HMDB0040560	4',5,7-Trihydroxy-3-methoxyflavanone	n/a	C16H14O6	302.079	M	0	302.079	0
302.079	HMDB0041673	4'-Methoxy-2',3,7-trihydroxyisoflavanone	n/a	C16H14O6	302.079	M	0	302.079	0
302.079	HMDB0126500	3,5,7-trihydroxy-2-(3-methoxyphenyl)-3,4-dihydro-2H-1-benzopyran-4-one	n/a	C16H14O6	302.079	M	0	302.079	0
302.079	HMDB0126501	3-(3-methoxyphenyl)-1-(2,4,6-trihydroxyphenyl)propane-1,2-dione	n/a	C16H14O6	302.079	M	0	302.079	0
302.079	HMDB0127498	3,5,7-trihydroxy-2-(4-methoxyphenyl)-3,4-dihydro-2H-1-benzopyran-4-one	n/a	C16H14O6	302.079	M	0	302.079	0
302.079	HMDB0127499	3-(4-methoxyphenyl)-1-(2,4,6-trihydroxyphenyl)propane-1,2-dione	n/a	C16H14O6	302.079	M	0	302.079	0
302.079	HMDB0128061	3-(3-hydroxy-4-methoxyphenyl)-1-(2,4,6-trihydroxyphenyl)prop-2-en-1-one	n/a	C16H14O6	302.079	M	0	302.079	0
302.079	HMDB0128200	5,7-dihydroxy-2-(3-hydroxy-5-methoxyphenyl)-3,4-dihydro-2H-1-benzopyran-4-one	n/a	C16H14O6	302.079	M	0	302.079	0
302.079	HMDB0128215	3-(3-hydroxy-5-methoxyphenyl)-1-(2,4,6-trihydroxyphenyl)prop-2-en-1-one	n/a	C16H14O6	302.079	M	0	302.079	0
302.079	HMDB0128583	5,7-dihydroxy-2-(4-hydroxyphenyl)-6-methoxy-3,4-dihydro-2H-1-benzopyran-4-one	n/a	C16H14O6	302.079	M	0	302.079	0
302.079	HMDB0129336	5,7-dihydroxy-3-(3-hydroxy-4-methoxyphenyl)-3,4-dihydro-2H-1-benzopyran-4-one	n/a	C16H14O6	302.079	M	0	302.079	0
302.079	HMDB0129419	4-{[3-(hydroxymethyl)-3-methyloxiran-2-yl]methoxy}-7H-furo[3,2-g]chromen-7-one	n/a	C16H14O6	302.079	M	0	302.079	0
302.079	HMDB0129960	5,6,7-trihydroxy-3-(4-methoxyphenyl)-3,4-dihydro-2H-1-benzopyran-4-one	n/a	C16H14O6	302.079	M	0	302.079	0
302.079	HMDB0130167	5,7,8-trihydroxy-2-(4-methoxyphenyl)-3,4-dihydro-2H-1-benzopyran-4-one	n/a	C16H14O6	302.079	M	0	302.079	0
302.079	HMDB0130168	3-(4-methoxyphenyl)-1-(2,3,4,6-tetrahydroxyphenyl)prop-2-en-1-one	n/a	C16H14O6	302.079	M	0	302.079	0
302.079	HMDB0130319	5,7-dihydroxy-2-(4-hydroxy-3-methoxyphenyl)-3,4-dihydro-2H-1-benzopyran-4-one	n/a	C16H14O6	302.079	M	0	302.079	0
302.079	HMDB0130321	3-(4-hydroxy-3-methoxyphenyl)-1-(2,4,6-trihydroxyphenyl)prop-2-en-1-one	n/a	C16H14O6	302.079	M	0	302.079	0
302.079	HMDB0130329	5,6,7-trihydroxy-2-(3-methoxyphenyl)-3,4-dihydro-2H-1-benzopyran-4-one	n/a	C16H14O6	302.079	M	0	302.079	0
302.079	HMDB0130330	3-(3-methoxyphenyl)-1-(2,3,4,6-tetrahydroxyphenyl)prop-2-en-1-one	n/a	C16H14O6	302.079	M	0	302.079	0
302.079	HMDB0130674	5,7,8-trihydroxy-6-methoxy-2-phenyl-3,4-dihydro-2H-1-benzopyran-4-one	n/a	C16H14O6	302.079	M	0	302.079	0
302.079	HMDB0130675	3-phenyl-1-(2,3,4,6-tetrahydroxy-5-methoxyphenyl)prop-2-en-1-one	n/a	C16H14O6	302.079	M	0	302.079	0
302.079	HMDB0130679	5,6,7-trihydroxy-8-methoxy-2-phenyl-3,4-dihydro-2H-1-benzopyran-4-one	n/a	C16H14O6	302.079	M	0	302.079	0
302.079	HMDB0131721	5-(5-hydroxy-6-methoxy-1-benzofuran-2-yl)-3-methoxybenzene-1,2-diol	n/a	C16H14O6	302.079	M	0	302.079	0
302.079	HMDB0131722	3-(5-hydroxy-6-methoxy-1-benzofuran-2-yl)-5-methoxybenzene-1,2-diol	n/a	C16H14O6	302.079	M	0	302.079	0
302.079	HMDB0131723	2-(5-hydroxy-6-methoxy-1-benzofuran-2-yl)-6-methoxybenzene-1,4-diol	n/a	C16H14O6	302.079	M	0	302.079	0
302.079	HMDB0131724	2-(3-hydroxy-5-methoxyphenyl)-6-methoxy-1-benzofuran-5,7-diol	n/a	C16H14O6	302.079	M	0	302.079	0
302.079	HMDB0131725	2-(3-hydroxy-5-methoxyphenyl)-6-methoxy-1-benzofuran-4,5-diol	n/a	C16H14O6	302.079	M	0	302.079	0
302.079	HMDB0132139	3,5,7-trihydroxy-8-methoxy-2-phenyl-3,4-dihydro-2H-1-benzopyran-4-one	n/a	C16H14O6	302.079	M	0	302.079	0
302.079	HMDB0132140	3-phenyl-1-(2,4,6-trihydroxy-3-methoxyphenyl)propane-1,2-dione	n/a	C16H14O6	302.079	M	0	302.079	0
302.079	HMDB0132871	7,8-dihydroxy-3-(4-hydroxyphenyl)-6-methoxy-3,4-dihydro-2H-1-benzopyran-4-one	n/a	C16H14O6	302.079	M	0	302.079	0
302.079	HMDB0132874	6,7,8-trihydroxy-3-(4-methoxyphenyl)-3,4-dihydro-2H-1-benzopyran-4-one	n/a	C16H14O6	302.079	M	0	302.079	0
302.079	HMDB0132885	5,7-dihydroxy-3-(4-hydroxyphenyl)-6-methoxy-3,4-dihydro-2H-1-benzopyran-4-one	n/a	C16H14O6	302.079	M	0	302.079	0
302.079	HMDB0133775	6,7-dihydroxy-3-(2-hydroxy-4-methoxyphenyl)-3,4-dihydro-2H-1-benzopyran-4-one	n/a	C16H14O6	302.079	M	0	302.079	0
302.079	HMDB0133776	3-(2,3-dihydroxy-4-methoxyphenyl)-7-hydroxy-3,4-dihydro-2H-1-benzopyran-4-one	n/a	C16H14O6	302.079	M	0	302.079	0
302.079	HMDB0133778	3-(2,5-dihydroxy-4-methoxyphenyl)-7-hydroxy-3,4-dihydro-2H-1-benzopyran-4-one	n/a	C16H14O6	302.079	M	0	302.079	0
302.079	HMDB0133779	7,8-dihydroxy-3-(2-hydroxy-4-methoxyphenyl)-3,4-dihydro-2H-1-benzopyran-4-one	n/a	C16H14O6	302.079	M	0	302.079	0
302.079	HMDB0135912	3-(2,4-dihydroxyphenyl)-7-hydroxy-5-methoxy-3,4-dihydro-2H-1-benzopyran-4-one	n/a	C16H14O6	302.079	M	0	302.079	0
302.079	HMDB0136020	3-(2,4-dihydroxyphenyl)-5-hydroxy-7-methoxy-3,4-dihydro-2H-1-benzopyran-4-one	n/a	C16H14O6	302.079	M	0	302.079	0
302.079	HMDB0137308	5,7-dihydroxy-2-(2-hydroxyphenyl)-6-methoxy-3,4-dihydro-2H-1-benzopyran-4-one	n/a	C16H14O6	302.079	M	0	302.079	0
302.079	HMDB0137309	3-(2-hydroxyphenyl)-1-(2,4,6-trihydroxy-3-methoxyphenyl)prop-2-en-1-one	n/a	C16H14O6	302.079	M	0	302.079	0
302.079	HMDB0137312	5,7-dihydroxy-2-(3-hydroxyphenyl)-6-methoxy-3,4-dihydro-2H-1-benzopyran-4-one	n/a	C16H14O6	302.079	M	0	302.079	0
302.079	HMDB0137313	3-(3-hydroxyphenyl)-1-(2,4,6-trihydroxy-3-methoxyphenyl)prop-2-en-1-one	n/a	C16H14O6	302.079	M	0	302.079	0
302.079	HMDB0137315	3-(4-hydroxyphenyl)-1-(2,4,6-trihydroxy-3-methoxyphenyl)prop-2-en-1-one	n/a	C16H14O6	302.079	M	0	302.079	0
302.079	HMDB0138083	14-methoxy-8,17-dioxatetracyclo[8.7.0.0ﾂｲ,竅ｷ.0ﾂｹﾂｹ,ﾂｹ竅ｶ]heptadeca-2(7),3,5,11,13,15-hexaene-4,5,13-triol	n/a	C16H14O6	302.079	M	0	302.079	0
302.079	HMDB0138084	14-methoxy-8,17-dioxatetracyclo[8.7.0.0ﾂｲ,竅ｷ.0ﾂｹﾂｹ,ﾂｹ竅ｶ]heptadeca-2(7),3,5,11,13,15-hexaene-5,6,13-triol	n/a	C16H14O6	302.079	M	0	302.079	0
302.079	HMDB0138085	14-methoxy-8,17-dioxatetracyclo[8.7.0.0ﾂｲ,竅ｷ.0ﾂｹﾂｹ,ﾂｹ竅ｶ]heptadeca-2(7),3,5,11,13,15-hexaene-5,13,15-triol	n/a	C16H14O6	302.079	M	0	302.079	0
302.079	HMDB0138086	14-methoxy-8,17-dioxatetracyclo[8.7.0.0ﾂｲ,竅ｷ.0ﾂｹﾂｹ,ﾂｹ竅ｶ]heptadeca-2,4,6,11,13,15-hexaene-3,5,13-triol	n/a	C16H14O6	302.079	M	0	302.079	0
302.079	HMDB0138087	14-methoxy-8,17-dioxatetracyclo[8.7.0.0ﾂｲ,竅ｷ.0ﾂｹﾂｹ,ﾂｹ竅ｶ]heptadeca-2(7),3,5,11,13,15-hexaene-5,12,13-triol	n/a	C16H14O6	302.079	M	0	302.079	0
302.079	HMDB0138599	5-(5-hydroxy-6-methoxy-1-benzofuran-2-yl)-4-methoxybenzene-1,3-diol	n/a	C16H14O6	302.079	M	0	302.079	0
302.079	HMDB0138619	6-(5,6-dimethoxy-1-benzofuran-2-yl)benzene-1,2,4-triol	n/a	C16H14O6	302.079	M	0	302.079	0
302.079	HMDB0138620	5-(5,6-dimethoxy-1-benzofuran-2-yl)benzene-1,2,3-triol	n/a	C16H14O6	302.079	M	0	302.079	0
302.079	HMDB0138621	5-(7-hydroxy-5,6-dimethoxy-1-benzofuran-2-yl)benzene-1,3-diol	n/a	C16H14O6	302.079	M	0	302.079	0
302.079	HMDB0138622	5-(4-hydroxy-5,6-dimethoxy-1-benzofuran-2-yl)benzene-1,3-diol	n/a	C16H14O6	302.079	M	0	302.079	0
302.079	HMDB0140574	5,7-dihydroxy-3-(4-hydroxy-3-methoxyphenyl)-3,4-dihydro-2H-1-benzopyran-4-one	n/a	C16H14O6	302.079	M	0	302.079	0
302.079	HMDB0140819	5-methoxy-8,17-dioxatetracyclo[8.7.0.0ﾂｲ,竅ｷ.0ﾂｹﾂｹ,ﾂｹ竅ｶ]heptadeca-2(7),3,5,11(16),12,14-hexaene-6,14,15-triol	n/a	C16H14O6	302.079	M	0	302.079	0
302.079	HMDB0140820	15-methoxy-8,17-dioxatetracyclo[8.7.0.0ﾂｲ,竅ｷ.0ﾂｹﾂｹ,ﾂｹ竅ｶ]heptadeca-2(7),3,5,11(16),12,14-hexaene-5,6,14-triol	n/a	C16H14O6	302.079	M	0	302.079	0
302.079	HMDB0141216	3-(3,4-dihydroxyphenyl)-7-hydroxy-6-methoxy-3,4-dihydro-2H-1-benzopyran-4-one	n/a	C16H14O6	302.079	M	0	302.079	0
302.079	HMDB0146209	SCHEMBL2305087	n/a	C16H14O6	302.079	M	0	302.079	0
302.079	HMDB0146210	6,7-dihydroxy-2-(4-hydroxyphenyl)-5-methoxy-3,4-dihydro-2H-1-benzopyran-4-one	n/a	C16H14O6	302.079	M	0	302.079	0
302.079	HMDB0146277	3-(3,4-dihydroxyphenyl)-5-hydroxy-7-methoxy-3,4-dihydro-2H-1-benzopyran-4-one	n/a	C16H14O6	302.079	M	0	302.079	0
302.079	HMDB0146282	5,6-dihydroxy-3-(3-hydroxyphenyl)-7-methoxy-3,4-dihydro-2H-1-benzopyran-4-one	n/a	C16H14O6	302.079	M	0	302.079	0
302.079	HMDB0146285	3-(3,5-dihydroxyphenyl)-5-hydroxy-7-methoxy-3,4-dihydro-2H-1-benzopyran-4-one	n/a	C16H14O6	302.079	M	0	302.079	0
302.079	HMDB0146388	3-(3,4-dihydroxyphenyl)-2-methyl-1-(2,4,6-trihydroxyphenyl)prop-2-en-1-one	n/a	C16H14O6	302.079	M	0	302.079	0
302.079	HMDB0147494	5,7-dihydroxy-3-(2-hydroxy-3-methoxyphenyl)-3,4-dihydro-2H-1-benzopyran-4-one	n/a	C16H14O6	302.079	M	0	302.079	0
302.079	HMDB0147800	5-(5,6-dimethoxy-1-benzofuran-2-yl)benzene-1,2,4-triol	n/a	C16H14O6	302.079	M	0	302.079	0
302.079	HMDB0147801	4-(5,6-dimethoxy-1-benzofuran-2-yl)benzene-1,2,3-triol	n/a	C16H14O6	302.079	M	0	302.079	0
302.079	HMDB0147802	4-(7-hydroxy-5,6-dimethoxy-1-benzofuran-2-yl)benzene-1,3-diol	n/a	C16H14O6	302.079	M	0	302.079	0
302.079	HMDB0147803	4-(4-hydroxy-5,6-dimethoxy-1-benzofuran-2-yl)benzene-1,3-diol	n/a	C16H14O6	302.079	M	0	302.079	0
302.079	HMDB0147826	14-methoxy-8,17-dioxatetracyclo[8.7.0.0ﾂｲ,竅ｷ.0ﾂｹﾂｹ,ﾂｹ竅ｶ]heptadeca-2,4,6,11(16),12,14-hexaene-4,5,6-triol	n/a	C16H14O6	302.079	M	0	302.079	0
302.079	HMDB0147827	14-methoxy-8,17-dioxatetracyclo[8.7.0.0ﾂｲ,竅ｷ.0ﾂｹﾂｹ,ﾂｹ竅ｶ]heptadeca-2(7),3,5,11,13,15-hexaene-5,6,12-triol	n/a	C16H14O6	302.079	M	0	302.079	0
302.079	HMDB0148469	5-methoxy-8,17-dioxatetracyclo[8.7.0.0ﾂｲ,竅ｷ.0ﾂｹﾂｹ,ﾂｹ竅ｶ]heptadeca-2(7),3,5,11(16),12,14-hexaene-10,13,14-triol	n/a	C16H14O6	302.079	M	0	302.079	0
302.079	HMDB0148470	5-methoxy-8,17-dioxatetracyclo[8.7.0.0ﾂｲ,竅ｷ.0ﾂｹﾂｹ,ﾂｹ竅ｶ]heptadeca-2,4,6,11(16),12,14-hexaene-4,10,14-triol	n/a	C16H14O6	302.079	M	0	302.079	0
302.079	HMDB0148471	5-methoxy-8,17-dioxatetracyclo[8.7.0.0ﾂｲ,竅ｷ.0ﾂｹﾂｹ,ﾂｹ竅ｶ]heptadeca-2(7),3,5,11(16),12,14-hexaene-10,14,15-triol	n/a	C16H14O6	302.079	M	0	302.079	0
302.079	HMDB0148472	5-methoxy-8,17-dioxatetracyclo[8.7.0.0ﾂｲ,竅ｷ.0ﾂｹﾂｹ,ﾂｹ竅ｶ]heptadeca-2(7),3,5,11(16),12,14-hexaene-6,10,14-triol	n/a	C16H14O6	302.079	M	0	302.079	0
302.079	HMDB0148473	5-methoxy-8,17-dioxatetracyclo[8.7.0.0ﾂｲ,竅ｷ.0ﾂｹﾂｹ,ﾂｹ竅ｶ]heptadeca-2(7),3,5,11,13,15-hexaene-10,12,14-triol	n/a	C16H14O6	302.079	M	0	302.079	0
302.079	HMDB0148474	5-methoxy-8,17-dioxatetracyclo[8.7.0.0ﾂｲ,竅ｷ.0ﾂｹﾂｹ,ﾂｹ竅ｶ]heptadeca-2,4,6,11(16),12,14-hexaene-3,10,14-triol	n/a	C16H14O6	302.079	M	0	302.079	0
302.079	HMDB0148488	14-methoxy-8,17-dioxatetracyclo[8.7.0.0ﾂｲ,竅ｷ.0ﾂｹﾂｹ,ﾂｹ竅ｶ]heptadeca-2(7),3,5,11(16),12,14-hexaene-4,5,10-triol	n/a	C16H14O6	302.079	M	0	302.079	0
302.079	HMDB0148489	14-methoxy-8,17-dioxatetracyclo[8.7.0.0ﾂｲ,竅ｷ.0ﾂｹﾂｹ,ﾂｹ竅ｶ]heptadeca-2(7),3,5,11,13,15-hexaene-5,10,13-triol	n/a	C16H14O6	302.079	M	0	302.079	0
302.079	HMDB0148490	14-methoxy-8,17-dioxatetracyclo[8.7.0.0ﾂｲ,竅ｷ.0ﾂｹﾂｹ,ﾂｹ竅ｶ]heptadeca-2(7),3,5,11(16),12,14-hexaene-5,6,10-triol	n/a	C16H14O6	302.079	M	0	302.079	0
302.079	HMDB0148491	14-methoxy-8,17-dioxatetracyclo[8.7.0.0ﾂｲ,竅ｷ.0ﾂｹﾂｹ,ﾂｹ竅ｶ]heptadeca-2(7),3,5,11(16),12,14-hexaene-5,10,15-triol	n/a	C16H14O6	302.079	M	0	302.079	0
302.079	HMDB0148492	14-methoxy-8,17-dioxatetracyclo[8.7.0.0ﾂｲ,竅ｷ.0ﾂｹﾂｹ,ﾂｹ竅ｶ]heptadeca-2,4,6,11(16),12,14-hexaene-3,5,10-triol	n/a	C16H14O6	302.079	M	0	302.079	0
302.079	HMDB0148493	6a,7-dihydroxymedicarpin	n/a	C16H14O6	302.079	M	0	302.079	0
302.079	HMDB0148679	5,6-dihydroxy-3-(4-hydroxyphenyl)-7-methoxy-3,4-dihydro-2H-1-benzopyran-4-one	n/a	C16H14O6	302.079	M	0	302.079	0
302.079	HMDB0148836	4,6-dihydroxy-2-[(4-hydroxy-3-methoxyphenyl)methyl]-2,3-dihydro-1-benzofuran-3-one	n/a	C16H14O6	302.079	M	0	302.079	0
302.079	HMDB0149275	4-(2,4-dihydroxy-3-methylidenebutoxy)-7H-furo[3,2-g]chromen-7-one	n/a	C16H14O6	302.079	M	0	302.079	0
302.079	HMDB0149277	4-[2-hydroxy-2-(2-methyloxiran-2-yl)ethoxy]-7H-furo[3,2-g]chromen-7-one	n/a	C16H14O6	302.079	M	0	302.079	0
302.079	HMDB0150256	5,7-dihydroxy-6-(hydroxymethyl)-2-(4-hydroxyphenyl)-3,4-dihydro-2H-1-benzopyran-4-one	n/a	C16H14O6	302.079	M	0	302.079	0
302.079	HMDB0151421	3,5,6,7-tetrahydroxy-8-methyl-2-phenyl-3,4-dihydro-2H-1-benzopyran-4-one	n/a	C16H14O6	302.079	M	0	302.079	0
302.079	HMDB0152185	5,7-dihydroxy-2-(3-hydroxyphenyl)-3-methoxy-3,4-dihydro-2H-1-benzopyran-4-one	n/a	C16H14O6	302.079	M	0	302.079	0
302.079	HMDB0152628	6,7-dihydroxy-3-(4-hydroxy-3-methoxyphenyl)-3,4-dihydro-2H-1-benzopyran-4-one	n/a	C16H14O6	302.079	M	0	302.079	0
302.079	HMDB0153239	5,7,4'-Trihydroxy-8-methoxyflavanone	n/a	C16H14O6	302.079	M	0	302.079	0
302.079	HMDB0153397	2-[(3,4-dihydroxyphenyl)methyl]-6-hydroxy-7-methoxy-2,3-dihydro-1-benzofuran-3-one	n/a	C16H14O6	302.079	M	0	302.079	0
302.079	HMDB0153502	3-[(3,4-dihydroxyphenyl)methyl]-5,7-dihydroxy-3,4-dihydro-2H-1-benzopyran-4-one	n/a	C16H14O6	302.079	M	0	302.079	0
302.079	HMDB0153951	(2E)-3-(4-hydroxyphenyl)-1-(2,3,6-trihydroxy-4-methoxyphenyl)prop-2-en-1-one	n/a	C16H14O6	302.079	M	0	302.079	0
302.079	HMDB0153952	(2E)-1-(2,6-dihydroxy-4-methoxyphenyl)-3-(2,4-dihydroxyphenyl)prop-2-en-1-one	n/a	C16H14O6	302.079	M	0	302.079	0
302.079	HMDB0153955	2-[3-(4-hydroxyphenyl)oxirane-2-carbonyl]-5-methoxybenzene-1,3-diol	n/a	C16H14O6	302.079	M	0	302.079	0
302.079	HMDB0174939	1,6,10-trihydroxy-3-(hydroxymethyl)-8-methoxy-9,10-dihydroanthracen-9-one	n/a	C16H14O6	302.079	M	0	302.079	0
302.079	HMDB0174940	2,5,10-trihydroxy-7-(hydroxymethyl)-4-methoxy-9,10-dihydroanthracen-9-one	n/a	C16H14O6	302.079	M	0	302.079	0
302.209	HMDB0037830	xi-7-Hydroxyhexadecanedioic acid	n/a	C16H30O5	302.209	M	0	302.209	1
302.209	HMDB0037831	xi-8-Hydroxyhexadecanedioic acid	n/a	C16H30O5	302.209	M	0	302.209	1
302.209	HMDB0161061	3-hydroxythapsic acid	n/a	C16H30O5	302.209	M	0	302.209	1
302.209	HMDB0161062	SCHEMBL7612460	n/a	C16H30O5	302.209	M	0	302.209	1
302.209	HMDB0161063	5-hydroxy-1,16-hexadecanedioic acid	n/a	C16H30O5	302.209	M	0	302.209	1
302.209	HMDB0161064	6-hydroxyhexadecanedioic acid	n/a	C16H30O5	302.209	M	0	302.209	1
302.209	HMDB0161065	hydroxyhexadecanedioic acid	n/a	C16H30O5	302.209	M	0	302.209	1
306.255	HMDB0002925	Dihomo-gamma-linolenic acid	C03242	C20H34O2	306.256	M	0	306.256	2
306.255	HMDB0010378	5,8,11-Eicosatrienoic acid	n/a	C20H34O2	306.256	M	0	306.256	2
306.255	HMDB0031058	Sciadonic acid	n/a	C20H34O2	306.256	M	0	306.256	2
306.255	HMDB0036835	Sagittariol	n/a	C20H34O2	306.256	M	0	306.256	2
306.255	HMDB0060039	Dihomo-alpha-linolenic acid	C16522	C20H34O2	306.256	M	0	306.256	2
306.255	HMDB0174094	(2Z,6E,10Z)-6,10-dimethyl-2-(4-methylpent-3-en-1-yl)dodeca-2,6,10-triene-1,12-diol	n/a	C20H34O2	306.256	M	0	306.256	2
306.255	HMDB0174095	(2Z,6E,10E)-3,7,11,15-tetramethylhexadeca-2,6,10,14-tetraene-1,12-diol	n/a	C20H34O2	306.256	M	0	306.256	2
306.255	HMDB0174096	SCHEMBL11706891	n/a	C20H34O2	306.256	M	0	306.256	2
306.255	HMDB0174097	(2Z,6E,10E)-3,7,11,15-tetramethylhexadeca-2,6,10,14-tetraene-1,8-diol	n/a	C20H34O2	306.256	M	0	306.256	2
306.255	HMDB0174098	(2E)-2-[(3E,7E)-4,8,12-trimethyltrideca-3,7,11-trien-1-yl]but-2-ene-1,4-diol	n/a	C20H34O2	306.256	M	0	306.256	2
306.255	HMDB0174099	(2Z,6E,10E)-3,7,11,15-tetramethylhexadeca-2,6,10,14-tetraene-1,4-diol	n/a	C20H34O2	306.256	M	0	306.256	2
306.255	HMDB0174100	(2Z,6E,10E)-3,7,11,15-tetramethylhexadeca-2,6,10,14-tetraene-1,13-diol	n/a	C20H34O2	306.256	M	0	306.256	2
306.255	HMDB0174101	(2Z,6E,10E)-3,7,11,15-tetramethylhexadeca-2,6,10,14-tetraene-1,9-diol	n/a	C20H34O2	306.256	M	0	306.256	2
306.255	HMDB0174102	(2Z,6E,10E)-3,7,11,15-tetramethylhexadeca-2,6,10,14-tetraene-1,5-diol	n/a	C20H34O2	306.256	M	0	306.256	2
306.255	HMDB0174103	14760-52-2	n/a	C20H34O2	306.256	M	0	306.256	2
306.255	HMDB0174104	(2Z,6E)-3,7-dimethyl-9-[3-methyl-3-(4-methylpent-3-en-1-yl)oxiran-2-yl]nona-2,6-dien-1-ol	n/a	C20H34O2	306.256	M	0	306.256	2
306.255	HMDB0174105	(2Z)-3-Methyl-5-[3-methyl-3-(4,8-dimethyl-3,7-nonadienyl)oxiranyl]-2-pentene-1-ol	n/a	C20H34O2	306.256	M	0	306.256	2
306.255	HMDB0174106	{3-methyl-3-[(3E,7E)-4,8,12-trimethyltrideca-3,7,11-trien-1-yl]oxiran-2-yl}methanol	n/a	C20H34O2	306.256	M	0	306.256	2
306.255	HMDB0174149	(6E,10E,14E)-2,6,10,14-tetramethylhexadeca-2,6,10,14-tetraene-1,16-diol	n/a	C20H34O2	306.256	M	0	306.256	2
306.255	HMDB0174150	SCHEMBL8576448	n/a	C20H34O2	306.256	M	0	306.256	2
306.255	HMDB0174151	(2E,6E,10E)-3,7,11,15-tetramethylhexadeca-2,6,10,14-tetraene-1,12-diol	n/a	C20H34O2	306.256	M	0	306.256	2
306.255	HMDB0174152	plaunotol	C13273	C20H34O2	306.256	M	0	306.256	2
306.255	HMDB0174153	(2E,6E,10E)-3,7,11,15-tetramethylhexadeca-2,6,10,14-tetraene-1,8-diol	n/a	C20H34O2	306.256	M	0	306.256	2
306.255	HMDB0174154	(2Z)-2-[(3E,7E)-4,8,12-trimethyltrideca-3,7,11-trien-1-yl]but-2-ene-1,4-diol	n/a	C20H34O2	306.256	M	0	306.256	2
306.255	HMDB0174155	(2E,6E,10E)-3,7,11,15-tetramethylhexadeca-2,6,10,14-tetraene-1,4-diol	n/a	C20H34O2	306.256	M	0	306.256	2
306.255	HMDB0174156	(2E,6E,10E)-3,7,11,15-tetramethylhexadeca-2,6,10,14-tetraene-1,13-diol	n/a	C20H34O2	306.256	M	0	306.256	2
306.255	HMDB0174157	60346-04-5	n/a	C20H34O2	306.256	M	0	306.256	2
306.255	HMDB0174158	(2E,6E,10E)-3,7,11,15-tetramethylhexadeca-2,6,10,14-tetraene-1,5-diol	n/a	C20H34O2	306.256	M	0	306.256	2
306.255	HMDB0174159	14,15-Epoxygeranylgeraniol	n/a	C20H34O2	306.256	M	0	306.256	2
306.255	HMDB0174160	(2E,6E)-3,7-dimethyl-9-[3-methyl-3-(4-methylpent-3-en-1-yl)oxiran-2-yl]nona-2,6-dien-1-ol	n/a	C20H34O2	306.256	M	0	306.256	2
306.255	HMDB0174161	6,7-Epoxygeranylgeraniol	n/a	C20H34O2	306.256	M	0	306.256	2
308.271	HMDB0005060	Eicosadienoic acid	C16525	C20H36O2	308.272	M	0	308.272	2
308.271	HMDB0036827	Sclareol	C09183	C20H36O2	308.272	M	0	308.272	2
308.271	HMDB0062432	(8Z,11Z)-icosadienoic acid	n/a	C20H36O2	308.272	M	0	308.272	2
312.099	HMDB0030679	Cabreuvin	n/a	C18H16O5	312.1	M	0	312.1	1
312.099	HMDB0030842	4',5,7-Trimethylapigenin	n/a	C18H16O5	312.1	M	0	312.1	1
312.099	HMDB0031385	(ﾂｱ)-Dulciol E	n/a	C18H16O5	312.1	M	0	312.1	1
312.099	HMDB0033639	3',4',5'-Trimethoxyflavone	n/a	C18H16O5	312.1	M	0	312.1	1
312.099	HMDB0036411	5-Hydroxy-4',7-dimethoxy-6-methylflavone	n/a	C18H16O5	312.1	M	0	312.1	1
312.099	HMDB0037330	3',5,6-Trimethoxyflavone	n/a	C18H16O5	312.1	M	0	312.1	1
312.099	HMDB0037331	2',5,6-Trimethoxyflavone	n/a	C18H16O5	312.1	M	0	312.1	1
312.099	HMDB0040354	1,4,5-Trihydroxy-3-prenylxanthone	n/a	C18H16O5	312.1	M	0	312.1	1
312.099	HMDB0128592	5,6,7-trimethoxy-2-phenyl-4H-chromen-4-one	C10024	C18H16O5	312.1	M	0	312.1	1
312.099	HMDB0129576	5-hydroxy-7-methoxy-3-(3-methoxyphenyl)-8-methyl-4H-chromen-4-one	n/a	C18H16O5	312.1	M	0	312.1	1
312.099	HMDB0131334	3-[2-(2H-1,3-benzodioxol-5-yl)-1-benzofuran-5-yl]propane-1,2-diol	n/a	C18H16O5	312.1	M	0	312.1	1
312.099	HMDB0131335	1-[2-(2H-1,3-benzodioxol-5-yl)-1-benzofuran-5-yl]propane-1,3-diol	n/a	C18H16O5	312.1	M	0	312.1	1
312.099	HMDB0131336	2-(2H-1,3-benzodioxol-5-yl)-5-(3-hydroxypropyl)-1-benzofuran-6-ol	n/a	C18H16O5	312.1	M	0	312.1	1
312.099	HMDB0131337	6-[5-(3-hydroxypropyl)-1-benzofuran-2-yl]-2H-1,3-benzodioxol-5-ol	n/a	C18H16O5	312.1	M	0	312.1	1
312.099	HMDB0131338	2-(2H-1,3-benzodioxol-5-yl)-5-(3-hydroxypropyl)-1-benzofuran-7-ol	n/a	C18H16O5	312.1	M	0	312.1	1
312.099	HMDB0131339	2-(2H-1,3-benzodioxol-5-yl)-5-(3-hydroxypropyl)-1-benzofuran-4-ol	n/a	C18H16O5	312.1	M	0	312.1	1
312.099	HMDB0149082	3-[2-(3,4-dihydroxyphenyl)-7-methoxy-1-benzofuran-5-yl]propanal	n/a	C18H16O5	312.1	M	0	312.1	1
312.099	HMDB0168987	CHEMBL2029704	n/a	C18H16O5	312.1	M	0	312.1	1
312.302	HMDB0000417	3D,7D,11D-Phytanic acid	n/a	C20H40O2	312.303	M	0	312.303	1
312.302	HMDB0000553	3L,7D,11D-Phytanic acid	n/a	C20H40O2	312.303	M	0	312.303	1
312.302	HMDB0000801	Phytanic acid	C01607	C20H40O2	312.303	M	0	312.303	1
312.302	HMDB0002212	Arachidic acid	C06425	C20H40O2	312.303	M	0	312.303	1
312.302	HMDB0031318	2,2,6,10,14-Pentamethylpentadecanoic acid	n/a	C20H40O2	312.303	M	0	312.303	1
312.302	HMDB0034156	Ethyl stearate	n/a	C20H40O2	312.303	M	0	312.303	1
312.302	HMDB0035672	5-Hydroxy-7-eicosanone	n/a	C20H40O2	312.303	M	0	312.303	1
312.302	HMDB0035673	4-Hydroxy-6-eicosanone	n/a	C20H40O2	312.303	M	0	312.303	1
312.302	HMDB0172166	(2E)-3,5,7,11-tetramethylhexadec-2-ene-1,5-diol	n/a	C20H40O2	312.303	M	0	312.303	1
312.302	HMDB0172167	(2E)-3,5,7,11-tetramethylhexadec-2-ene-1,7-diol	n/a	C20H40O2	312.303	M	0	312.303	1
312.302	HMDB0172168	(2E)-3,5,7,11-tetramethylhexadec-2-ene-1,11-diol	n/a	C20H40O2	312.303	M	0	312.303	1
312.302	HMDB0172169	(2E)-3,5,7,11-tetramethylhexadec-2-ene-1,4-diol	n/a	C20H40O2	312.303	M	0	312.303	1
312.302	HMDB0172170	(2Z)-2-(2,4,8-trimethyltridecyl)but-2-ene-1,4-diol	n/a	C20H40O2	312.303	M	0	312.303	1
312.302	HMDB0172171	(2E)-3,5,7,11-tetramethylhexadec-2-ene-1,15-diol	n/a	C20H40O2	312.303	M	0	312.303	1
312.302	HMDB0172172	[3-methyl-3-(2,4,8-trimethyltridecyl)oxiran-2-yl]methanol	n/a	C20H40O2	312.303	M	0	312.303	1
312.302	HMDB0172173	(2E)-5-(2,6-dimethylundecyl)-3-methylhex-2-ene-1,6-diol	n/a	C20H40O2	312.303	M	0	312.303	1
312.302	HMDB0172174	(2E)-3,5-dimethyl-7-(4-methylnonyl)oct-2-ene-1,8-diol	n/a	C20H40O2	312.303	M	0	312.303	1
312.302	HMDB0172175	(2E)-3,5,7-trimethyl-11-pentyldodec-2-ene-1,12-diol	n/a	C20H40O2	312.303	M	0	312.303	1
312.302	HMDB0172176	(2E)-3,5,7,11-tetramethylhexadec-2-ene-1,16-diol	n/a	C20H40O2	312.303	M	0	312.303	1
312.302	HMDB0181945	(11E)-icos-11-ene-1,13-diol	n/a	C20H40O2	312.303	M	0	312.303	1
312.302	HMDB0181946	(11E)-icos-11-ene-1,10-diol	n/a	C20H40O2	312.303	M	0	312.303	1
312.302	HMDB0181947	(11E)-icos-11-ene-1,19-diol	n/a	C20H40O2	312.303	M	0	312.303	1
312.302	HMDB0181948	11,12-Epoxyicosan-1-ol	n/a	C20H40O2	312.303	M	0	312.303	1
312.302	HMDB0181949	(9E)-icos-9-ene-1,20-diol	n/a	C20H40O2	312.303	M	0	312.303	1
314.282	HMDB0061651	3-hydroxypristanic acid	n/a	C19H38O3	314.282	M	0	314.282	1
314.282	HMDB0161449	18-Hydroxynonadecanoic acid	n/a	C19H38O3	314.282	M	0	314.282	1
314.282	HMDB0161450	19-hydroxy-nonadecanoic acid	n/a	C19H38O3	314.282	M	0	314.282	1
314.282	HMDB0161451	2-hydroxy-nonadecanoic acid	n/a	C19H38O3	314.282	M	0	314.282	1
315.146	HMDB0006921	(S)-3-Hydroxy-N-methylcoclaurine	C05202	C18H21NO4	315.147	M	0	315.147	2
315.146	HMDB0014640	Oxycodone	C08018	C18H21NO4	315.147	M	0	315.147	2
315.146	HMDB0030181	Erythratine	n/a	C18H21NO4	315.147	M	0	315.147	2
315.146	HMDB0033028	N-Dihydroferuloyltyramine	n/a	C18H21NO4	315.147	M	0	315.147	2
315.146	HMDB0033948	Codeine N-oxide	n/a	C18H21NO4	315.147	M	0	315.147	2
315.146	HMDB0134790	2,5-dihydroxy-5-(methylamino)-3,4-diphenylpentanoic acid	n/a	C18H21NO4	315.147	M	0	315.147	2
315.146	HMDB0139472	N-[2-hydroxy-2-(4-methoxyphenyl)ethyl]-3-(2-hydroxyphenyl)propanimidic acid	n/a	C18H21NO4	315.147	M	0	315.147	2
315.146	HMDB0139473	3-hydroxy-N-[2-hydroxy-2-(4-methoxyphenyl)ethyl]-3-phenylpropanimidic acid	n/a	C18H21NO4	315.147	M	0	315.147	2
315.146	HMDB0139475	N-[2-hydroxy-2-(4-methoxyphenyl)ethyl]-3-(3-hydroxyphenyl)propanimidic acid	n/a	C18H21NO4	315.147	M	0	315.147	2
315.146	HMDB0139476	N-[2-hydroxy-2-(4-methoxyphenyl)ethyl]-3-(4-hydroxyphenyl)propanimidic acid	n/a	C18H21NO4	315.147	M	0	315.147	2
315.146	HMDB0139477	2-hydroxy-N-[2-hydroxy-2-(4-methoxyphenyl)ethyl]-3-phenylpropanimidic acid	n/a	C18H21NO4	315.147	M	0	315.147	2
315.146	HMDB0149445	5-amino-2-hydroxy-5-methoxy-3,4-diphenylpentanoic acid	n/a	C18H21NO4	315.147	M	0	315.147	2
316.24	HMDB0000253	Pregnenolone	C01953	C21H32O2	316.24	M	0	316.24	2
316.24	HMDB0003069	(20S)-20-hydroxypregn-4-en-3-one	C04042	C21H32O2	316.24	M	0	316.24	2
316.24	HMDB0003759	5a-Pregnane-3,20-dione	C03681	C21H32O2	316.24	M	0	316.24	2
316.24	HMDB0004627	Calusterone	n/a	C21H32O2	316.24	M	0	316.24	2
316.24	HMDB0006002	Ethyltestosterone	n/a	C21H32O2	316.24	M	0	316.24	2
316.24	HMDB0006026	Norbolethone	D05204	C21H32O2	316.24	M	0	316.24	2
316.24	HMDB0006048	Bolasterone	C14475	C21H32O2	316.24	M	0	316.24	2
316.24	HMDB0034369	(3beta,5alpha)-3-Hydroxypregn-16-en-20-one	n/a	C21H32O2	316.24	M	0	316.24	2
316.24	HMDB0035580	1-Phenyl-1,3-pentadecanedione	n/a	C21H32O2	316.24	M	0	316.24	2
316.24	HMDB0036729	Kaurenoic acid methyl ester	n/a	C21H32O2	316.24	M	0	316.24	2
316.24	HMDB0038534	5-(8,11-Pentadecadienyl)-1,3-benzenediol	n/a	C21H32O2	316.24	M	0	316.24	2
316.24	HMDB0059652	5-alpha-Pregnan-3,20-dione	n/a	C21H32O2	316.24	M	0	316.24	2
316.24	HMDB0156096	1-[(1S,2R,11S,15S)-5-hydroxy-2,15-dimethyltetracyclo[8.7.0.0ﾂｲ,竅ｷ.0ﾂｹﾂｹ,ﾂｹ竅ｵ]heptadec-7-en-14-yl]ethan-1-one	n/a	C21H32O2	316.24	M	0	316.24	2
316.24	HMDB0156105	(2R,15S)-14-(1-hydroxyethyl)-2,15-dimethyltetracyclo[8.7.0.0ﾂｲ,竅ｷ.0ﾂｹﾂｹ,ﾂｹ竅ｵ]heptadec-7-en-5-one	n/a	C21H32O2	316.24	M	0	316.24	2
316.24	HMDB0173660	14-(1-hydroxyethyl)-2,15-dimethyltetracyclo[8.7.0.0ﾂｲ,竅ｷ.0ﾂｹﾂｹ,ﾂｹ竅ｵ]heptadec-13-en-5-one	n/a	C21H32O2	316.24	M	0	316.24	2
316.24	HMDB0173666	Pregnane-3,20-dione	n/a	C21H32O2	316.24	M	0	316.24	2
316.24	HMDB0186442	(1S,2R,10S,11S,15S)-14-(1-hydroxyethyl)-2,15-dimethyltetracyclo[8.7.0.0ﾂｲ,竅ｷ.0ﾂｹﾂｹ,ﾂｹ竅ｵ]heptadec-6-en-5-one	n/a	C21H32O2	316.24	M	0	316.24	2
316.24	HMDB0186450	(2S,15S)-14-(1-hydroxyethenyl)-2,15-dimethyltetracyclo[8.7.0.0ﾂｲ,竅ｷ.0ﾂｹﾂｹ,ﾂｹ竅ｵ]heptadecan-5-one	n/a	C21H32O2	316.24	M	0	316.24	2
327.277	HMDB0013246	Margaroylglycine	n/a	C19H37NO3	327.277	M	0	327.277	2
328.095	HMDB0029677	Zapotinin	n/a	C18H16O6	328.095	M	0	328.095	0
328.095	HMDB0030596	Ugaxanthone	n/a	C18H16O6	328.095	M	0	328.095	0
328.095	HMDB0030727	Betagarin	C09479	C18H16O6	328.095	M	0	328.095	0
328.095	HMDB0030834	Americanin A	n/a	C18H16O6	328.095	M	0	328.095	0
328.095	HMDB0033169	Garbogiol	n/a	C18H16O6	328.095	M	0	328.095	0
328.095	HMDB0033318	Isoamericanin A	n/a	C18H16O6	328.095	M	0	328.095	0
328.095	HMDB0034109	Frenolicin B	n/a	C18H16O6	328.095	M	0	328.095	0
328.095	HMDB0034186	Morusignin B	n/a	C18H16O6	328.095	M	0	328.095	0
328.095	HMDB0037458	5-Hydroxy-4',7,8-trimethoxyflavone	n/a	C18H16O6	328.095	M	0	328.095	0
328.095	HMDB0039601	Americanin D	n/a	C18H16O6	328.095	M	0	328.095	0
328.095	HMDB0040303	5-Hydroxy-4,4',6-trimethoxyaurone	n/a	C18H16O6	328.095	M	0	328.095	0
328.095	HMDB0040719	8-Hydroxy-4',5,7-trimethoxyflavone	n/a	C18H16O6	328.095	M	0	328.095	0
328.095	HMDB0040935	Methyl 2-(2-methoxy-4-hydroxyphenyl)-6-methoxy-3-benzofurancarboxylate	n/a	C18H16O6	328.095	M	0	328.095	0
328.095	HMDB0041544	7-Hydroxy-3,4',8-trimethoxyflavone	n/a	C18H16O6	328.095	M	0	328.095	0
328.095	HMDB0128575	7-hydroxy-5,6-dimethoxy-2-(4-methoxyphenyl)-4H-chromen-4-one	n/a	C18H16O6	328.095	M	0	328.095	0
328.095	HMDB0128576	6-hydroxy-5,7-dimethoxy-2-(4-methoxyphenyl)-4H-chromen-4-one	C14985	C18H16O6	328.095	M	0	328.095	0
328.095	HMDB0128577	5-hydroxy-6,7-dimethoxy-2-(4-methoxyphenyl)-4H-chromen-4-one	n/a	C18H16O6	328.095	M	0	328.095	0
328.095	HMDB0128578	2-(4-hydroxyphenyl)-5,6,7-trimethoxy-4H-chromen-4-one	C14986	C18H16O6	328.095	M	0	328.095	0
328.095	HMDB0129574	5-hydroxy-3-(4-hydroxy-3-methoxyphenyl)-7-methoxy-8-methyl-4H-chromen-4-one	n/a	C18H16O6	328.095	M	0	328.095	0
328.095	HMDB0130360	3-(3,4-dimethoxyphenyl)-6-hydroxy-7-methoxy-4H-chromen-4-one	n/a	C18H16O6	328.095	M	0	328.095	0
328.095	HMDB0130363	3-(3,4-dimethoxyphenyl)-8-hydroxy-7-methoxy-4H-chromen-4-one	n/a	C18H16O6	328.095	M	0	328.095	0
328.095	HMDB0130364	3-(3,4-dimethoxyphenyl)-5-hydroxy-7-methoxy-4H-chromen-4-one	n/a	C18H16O6	328.095	M	0	328.095	0
328.095	HMDB0137467	2-(3,4-dihydroxyphenyl)ethenyl (2E)-3-(4-hydroxy-3-methoxyphenyl)prop-2-enoate	n/a	C18H16O6	328.095	M	0	328.095	0
328.095	HMDB0137468	2-(4-hydroxy-3-methoxyphenyl)ethenyl (2E)-3-(3,4-dihydroxyphenyl)prop-2-enoate	n/a	C18H16O6	328.095	M	0	328.095	0
328.095	HMDB0140447	7-hydroxy-2-(3,4,5-trimethoxyphenyl)-4H-chromen-4-one	n/a	C18H16O6	328.095	M	0	328.095	0
328.095	HMDB0140448	6-hydroxy-2-(3,4,5-trimethoxyphenyl)-4H-chromen-4-one	n/a	C18H16O6	328.095	M	0	328.095	0
328.095	HMDB0140451	5-hydroxy-2-(3,4,5-trimethoxyphenyl)-4H-chromen-4-one	n/a	C18H16O6	328.095	M	0	328.095	0
328.095	HMDB0148427	4-hydroxy-17-(prop-2-en-1-yl)-12,16-dioxatetracyclo[8.7.0.0ﾂｳ,竅ｸ.0ﾂｹﾂｹ,ﾂｹ竅ｵ]heptadeca-3(8),4,6-triene-2,9,13-trione	n/a	C18H16O6	328.095	M	0	328.095	0
328.095	HMDB0150243	5-hydroxy-6-(hydroxymethyl)-7-methoxy-2-(4-methoxyphenyl)-4H-chromen-4-one	n/a	C18H16O6	328.095	M	0	328.095	0
328.095	HMDB0150803	7-hydroxy-5,6-dimethoxy-2-(3-methoxyphenyl)-4H-chromen-4-one	n/a	C18H16O6	328.095	M	0	328.095	0
328.095	HMDB0151998	7-hydroxy-5,6-dimethoxy-2-(2-methoxyphenyl)-4H-chromen-4-one	n/a	C18H16O6	328.095	M	0	328.095	0
328.095	HMDB0154315	5-hydroxy-7,8,3'-trimethoxyflavone	n/a	C18H16O6	328.095	M	0	328.095	0
328.095	HMDB0154332	7-hydroxy-5,8-dimethoxy-2-(3-methoxyphenyl)-4H-chromen-4-one	n/a	C18H16O6	328.095	M	0	328.095	0
328.095	HMDB0154343	Alnetin	n/a	C18H16O6	328.095	M	0	328.095	0
329.256	HMDB0006202	4,8 Dimethylnonanoyl carnitine	n/a	C18H35NO4	329.257	M	0	329.257	2
329.256	HMDB0013321	Undecanoylcarnitine	n/a	C18H35NO4	329.257	M	0	329.257	2
330.24	HMDB0004708	9,12,13-TriHOME	C14833	C18H34O5	330.241	M	0	330.241	1
330.24	HMDB0004710	9,10,13-TriHOME	C14835	C18H34O5	330.241	M	0	330.241	1
330.24	HMDB0030936	5,8,12-Trihydroxy-9-octadecenoic acid	n/a	C18H34O5	330.241	M	0	330.241	1
330.24	HMDB0038555	(9S,10E,12S,13S)-9,12,13-Trihydroxy-10-octadecenoic acid	n/a	C18H34O5	330.241	M	0	330.241	1
330.24	HMDB0172549	9,10-dihydroxy-18-oxooctadecanoic acid	n/a	C18H34O5	330.241	M	0	330.241	1
333.23	HMDB0161617	(8E)-9-(4-hydroxy-3-methoxyphenyl)-N-(2-methylpropyl)non-8-enimidic acid	n/a	C20H31NO3	333.23	M	0	333.23	2
334.066	HMDB0011649	Glycerophosphoinositol	C01225	C9H19O11P	334.066	M	0	334.066	1
335.147	HMDB0181184	2-({2-[(carboxyimino)(hydroxy)methyl]-5-methylphenyl}methanimidamido)-2,3-dimethylbutanoic acid	n/a	C16H21N3O5	335.148	M	0	335.148	2
340.127	HMDB0181318	6-[1-(3-ethenyl-6-methylpyrazin-2-yl)ethoxy]-3,4,5-trihydroxyoxane-2-carboxylic acid	n/a	C15H20N2O7	340.127	M	0	340.127	1
340.127	HMDB0181320	6-[(5-ethenyl-6-ethylpyrazin-2-yl)methoxy]-3,4,5-trihydroxyoxane-2-carboxylic acid	n/a	C15H20N2O7	340.127	M	0	340.127	1
340.127	HMDB0181322	6-[2-(3-ethenyl-6-methylpyrazin-2-yl)ethoxy]-3,4,5-trihydroxyoxane-2-carboxylic acid	n/a	C15H20N2O7	340.127	M	0	340.127	1
340.127	HMDB0181415	6-{2-[(1Z)-1,2-diaminoprop-1-en-1-yl]phenoxy}-3,4,5-trihydroxyoxane-2-carboxylic acid	n/a	C15H20N2O7	340.127	M	0	340.127	1
340.297	HMDB0032476	Polyoxyethylene (600) monoricinoleate	n/a	C21H40O3	340.298	M	0	340.298	2
350.184	HMDB0140026	N-(3-aminopropyl)-3-(4-hydroxy-3,5-dimethoxyphenyl)-N-(4-oxobutyl)prop-2-enamide	n/a	C18H26N2O5	350.184	M	0	350.184	2
362.1	HMDB0129274	2-(3,4-dimethoxyphenyl)-5,7,8-trihydroxy-3-methoxy-3,4-dihydro-2H-1-benzopyran-4-one	n/a	C18H18O8	362.1	M	0	362.1	0
362.1	HMDB0130262	5,7-dihydroxy-2-(3-hydroxy-4-methoxyphenyl)-3,6-dimethoxy-3,4-dihydro-2H-1-benzopyran-4-one	n/a	C18H18O8	362.1	M	0	362.1	0
362.1	HMDB0130747	3-(4-hydroxy-3-methoxyphenyl)-1-(2,4,6-trihydroxy-3,5-dimethoxyphenyl)prop-2-en-1-one	n/a	C18H18O8	362.1	M	0	362.1	0
362.1	HMDB0132200	5,7-dihydroxy-2-(3-hydroxy-4-methoxyphenyl)-6,8-dimethoxy-3,4-dihydro-2H-1-benzopyran-4-one	n/a	C18H18O8	362.1	M	0	362.1	0
362.1	HMDB0132201	3-(3-hydroxy-4-methoxyphenyl)-1-(2,4,6-trihydroxy-3,5-dimethoxyphenyl)prop-2-en-1-one	n/a	C18H18O8	362.1	M	0	362.1	0
362.1	HMDB0133835	5,7-dihydroxy-2-(4-hydroxy-3-methoxyphenyl)-3,6-dimethoxy-3,4-dihydro-2H-1-benzopyran-4-one	n/a	C18H18O8	362.1	M	0	362.1	0
362.1	HMDB0137987	3,5,7-trihydroxy-6,8-dimethoxy-2-(4-methoxyphenyl)-3,4-dihydro-2H-1-benzopyran-4-one	n/a	C18H18O8	362.1	M	0	362.1	0
362.1	HMDB0137989	5,7,8-trihydroxy-3,6-dimethoxy-2-(4-methoxyphenyl)-3,4-dihydro-2H-1-benzopyran-4-one	n/a	C18H18O8	362.1	M	0	362.1	0
362.1	HMDB0137992	3-(4-methoxyphenyl)-1-(2,4,6-trihydroxy-3,5-dimethoxyphenyl)propane-1,2-dione	n/a	C18H18O8	362.1	M	0	362.1	0
362.1	HMDB0137994	5,6,7-trihydroxy-3,8-dimethoxy-2-(4-methoxyphenyl)-3,4-dihydro-2H-1-benzopyran-4-one	n/a	C18H18O8	362.1	M	0	362.1	0
362.1	HMDB0137997	5,7-dihydroxy-2-(4-hydroxyphenyl)-3,6,8-trimethoxy-3,4-dihydro-2H-1-benzopyran-4-one	n/a	C18H18O8	362.1	M	0	362.1	0
362.1	HMDB0138016	5,7-dihydroxy-2-(4-hydroxy-3,5-dimethoxyphenyl)-8-methoxy-3,4-dihydro-2H-1-benzopyran-4-one	n/a	C18H18O8	362.1	M	0	362.1	0
362.1	HMDB0138019	3-(4-hydroxy-3,5-dimethoxyphenyl)-1-(2,4,6-trihydroxy-3-methoxyphenyl)prop-2-en-1-one	n/a	C18H18O8	362.1	M	0	362.1	0
362.1	HMDB0138030	2-(3,5-dimethoxyphenyl)-5,6,7-trihydroxy-8-methoxy-3,4-dihydro-2H-1-benzopyran-4-one	n/a	C18H18O8	362.1	M	0	362.1	0
362.1	HMDB0138524	5,7-dihydroxy-2-(4-hydroxy-3-methoxyphenyl)-6,8-dimethoxy-3,4-dihydro-2H-1-benzopyran-4-one	n/a	C18H18O8	362.1	M	0	362.1	0
362.1	HMDB0138529	2-(3,4-dimethoxyphenyl)-5,7,8-trihydroxy-6-methoxy-3,4-dihydro-2H-1-benzopyran-4-one	n/a	C18H18O8	362.1	M	0	362.1	0
362.1	HMDB0138531	3-(3,4-dimethoxyphenyl)-1-(2,3,4,6-tetrahydroxy-5-methoxyphenyl)prop-2-en-1-one	n/a	C18H18O8	362.1	M	0	362.1	0
362.1	HMDB0138537	2-(3,4-dimethoxyphenyl)-5,6,7-trihydroxy-8-methoxy-3,4-dihydro-2H-1-benzopyran-4-one	n/a	C18H18O8	362.1	M	0	362.1	0
362.1	HMDB0145700	2-(3,4-dimethoxyphenyl)-3,5,7-trihydroxy-8-methoxy-3,4-dihydro-2H-1-benzopyran-4-one	n/a	C18H18O8	362.1	M	0	362.1	0
362.1	HMDB0145701	3-(3,4-dimethoxyphenyl)-1-(2,4,6-trihydroxy-3-methoxyphenyl)propane-1,2-dione	n/a	C18H18O8	362.1	M	0	362.1	0
362.1	HMDB0145703	5,7-dihydroxy-2-(3-hydroxy-4-methoxyphenyl)-3,8-dimethoxy-3,4-dihydro-2H-1-benzopyran-4-one	n/a	C18H18O8	362.1	M	0	362.1	0
362.1	HMDB0145708	5,7-dihydroxy-2-(4-hydroxy-3-methoxyphenyl)-3,8-dimethoxy-3,4-dihydro-2H-1-benzopyran-4-one	n/a	C18H18O8	362.1	M	0	362.1	0
362.1	HMDB0146602	5,7-dihydroxy-2-(3-hydroxy-5-methoxyphenyl)-3,6-dimethoxy-3,4-dihydro-2H-1-benzopyran-4-one	n/a	C18H18O8	362.1	M	0	362.1	0
362.1	HMDB0151597	5,8-dihydroxy-3-[hydroxy(4-hydroxyphenyl)methyl]-6,7-dimethoxy-3,4-dihydro-2H-1-benzopyran-4-one	n/a	C18H18O8	362.1	M	0	362.1	0
362.1	HMDB0151598	3-[(3,4-dihydroxyphenyl)methyl]-5,8-dihydroxy-6,7-dimethoxy-3,4-dihydro-2H-1-benzopyran-4-one	n/a	C18H18O8	362.1	M	0	362.1	0
362.1	HMDB0152105	5,7-dihydroxy-2-(3-hydroxy-5-methoxyphenyl)-6,8-dimethoxy-3,4-dihydro-2H-1-benzopyran-4-one	n/a	C18H18O8	362.1	M	0	362.1	0
362.1	HMDB0152108	3-(3-hydroxy-5-methoxyphenyl)-1-(2,4,6-trihydroxy-3,5-dimethoxyphenyl)prop-2-en-1-one	n/a	C18H18O8	362.1	M	0	362.1	0
362.1	HMDB0154316	5-hydroxy-2-(1-hydroxy-5-methoxy-4-oxocyclohex-2-en-1-yl)-7,8-dimethoxy-4H-chromen-4-one	n/a	C18H18O8	362.1	M	0	362.1	0
362.1	HMDB0154317	5-hydroxy-2-(1-hydroxy-3-methoxy-4-oxocyclohex-2-en-1-yl)-7,8-dimethoxy-4H-chromen-4-one	n/a	C18H18O8	362.1	M	0	362.1	0
362.1	HMDB0154347	5-hydroxy-2-(1-hydroxy-4-oxocyclohex-2-en-1-yl)-6,7,8-trimethoxy-4H-chromen-4-one	n/a	C18H18O8	362.1	M	0	362.1	0
362.1	HMDB0175048	3,4,5-trihydroxy-6-(2-phenoxyphenoxy)oxane-2-carboxylic acid	n/a	C18H18O8	362.1	M	0	362.1	0
362.1	HMDB0175049	3,4,5-trihydroxy-6-(3-phenoxyphenoxy)oxane-2-carboxylic acid	n/a	C18H18O8	362.1	M	0	362.1	0
362.1	HMDB0175050	3,4,5-trihydroxy-6-(4-phenoxyphenoxy)oxane-2-carboxylic acid	n/a	C18H18O8	362.1	M	0	362.1	0
362.1	HMDB0176936	2-[4-(2-carboxyethyl)-2-hydroxyphenoxy]-3-(3,4-dihydroxyphenyl)propanoic acid	n/a	C18H18O8	362.1	M	0	362.1	0
400.335	HMDB0000501	7-Ketocholesterol	n/a	C27H44O2	400.334	M	0	400.334	1
400.335	HMDB0001993	7a-Hydroxy-cholestene-3-one	C05455	C27H44O2	400.334	M	0	400.334	1
400.335	HMDB0003550	Calcidiol	C01561	C27H44O2	400.334	M	0	400.334	1
400.335	HMDB0006721	5,6-trans-25-Hydroxyvitamin D3	n/a	C27H44O2	400.334	M	0	400.334	1
400.335	HMDB0006722	25-Hydroxytachysterol3	n/a	C27H44O2	400.334	M	0	400.334	1
400.335	HMDB0015504	Alfacalcidol	n/a	C27H44O2	400.334	M	0	400.334	1
400.335	HMDB0034328	(3beta,5alpha,6a)-Cholesta-8,14-diene-3,6-diol	n/a	C27H44O2	400.334	M	0	400.334	1
400.335	HMDB0035585	1-Phenyl-1,3-heneicosanedione	n/a	C27H44O2	400.334	M	0	400.334	1
400.335	HMDB0036012	5-Methyl-2,4-bis(3-methyl-2-butenyl)-6-(2-methyl-1-oxopropyl)-5-(4-methyl-3-pentenyl)cyclohexanone	n/a	C27H44O2	400.334	M	0	400.334	1
400.335	HMDB0039871	5-(12,15-Heneicosadienyl)-1,3-benzenediol	n/a	C27H44O2	400.334	M	0	400.334	1
400.335	HMDB0060131	3beta-Hydroxy-5-cholestenal	n/a	C27H44O2	400.334	M	0	400.334	1
400.335	HMDB0060132	27alpha-Hydroxy-8-dehydrocholesterol	n/a	C27H44O2	400.334	M	0	400.334	1
400.335	HMDB0154866	(1S,2R,11R,15R)-14-(1-hydroxy-6-methylheptan-2-yl)-2,15-dimethyltetracyclo[8.7.0.0ﾂｲ,竅ｷ.0ﾂｹﾂｹ,ﾂｹ竅ｵ]heptadeca-7,9-dien-5-ol	n/a	C27H44O2	400.334	M	0	400.334	1
400.335	HMDB0154867	(1S,2R,11R,15R)-2,15-dimethyl-14-(6-methylheptan-2-yl)tetracyclo[8.7.0.0ﾂｲ,竅ｷ.0ﾂｹﾂｹ,ﾂｹ竅ｵ]heptadeca-7,9-diene-5,17-diol	n/a	C27H44O2	400.334	M	0	400.334	1
400.335	HMDB0155080	(2R,15S)-13-hydroxy-2,15-dimethyl-14-(6-methylheptan-2-yl)tetracyclo[8.7.0.0ﾂｲ,竅ｷ.0ﾂｹﾂｹ,ﾂｹ竅ｵ]heptadec-7-en-5-one	n/a	C27H44O2	400.334	M	0	400.334	1
400.335	HMDB0155081	(2R,15S)-14-(1-hydroxy-6-methylheptan-2-yl)-2,15-dimethyltetracyclo[8.7.0.0ﾂｲ,竅ｷ.0ﾂｹﾂｹ,ﾂｹ竅ｵ]heptadec-7-en-5-one	n/a	C27H44O2	400.334	M	0	400.334	1
400.335	HMDB0155082	(2S,15R)-2-(hydroxymethyl)-15-methyl-14-(6-methylheptan-2-yl)tetracyclo[8.7.0.0ﾂｲ,竅ｷ.0ﾂｹﾂｹ,ﾂｹ竅ｵ]heptadec-7-en-5-one	n/a	C27H44O2	400.334	M	0	400.334	1
400.335	HMDB0155083	(2R,15S)-15-(hydroxymethyl)-2-methyl-14-(6-methylheptan-2-yl)tetracyclo[8.7.0.0ﾂｲ,竅ｷ.0ﾂｹﾂｹ,ﾂｹ竅ｵ]heptadec-7-en-5-one	n/a	C27H44O2	400.334	M	0	400.334	1
400.335	HMDB0155084	(2R,15R)-14-(6-hydroxy-6-methylheptan-2-yl)-2,15-dimethyltetracyclo[8.7.0.0ﾂｲ,竅ｷ.0ﾂｹﾂｹ,ﾂｹ竅ｵ]heptadec-7-en-5-one	n/a	C27H44O2	400.334	M	0	400.334	1
400.335	HMDB0155085	SCHEMBL14121840	n/a	C27H44O2	400.334	M	0	400.334	1
400.335	HMDB0155086	(2R,15R)-9-hydroxy-2,15-dimethyl-14-(6-methylheptan-2-yl)tetracyclo[8.7.0.0ﾂｲ,竅ｷ.0ﾂｹﾂｹ,ﾂｹ竅ｵ]heptadec-7-en-5-one	n/a	C27H44O2	400.334	M	0	400.334	1
400.335	HMDB0155087	(2R,15R)-14-(7-hydroxy-6-methylheptan-2-yl)-2,15-dimethyltetracyclo[8.7.0.0ﾂｲ,竅ｷ.0ﾂｹﾂｹ,ﾂｹ竅ｵ]heptadec-7-en-5-one	n/a	C27H44O2	400.334	M	0	400.334	1
400.335	HMDB0172273	2-(8,12-dimethyl-4-methylidenetridecyl)-2,7-dimethyl-3,4-dihydro-2H-1-benzopyran-6-ol	n/a	C27H44O2	400.334	M	0	400.334	1
400.335	HMDB0172274	2-(4,12-dimethyl-8-methylidenetridecyl)-2,7-dimethyl-3,4-dihydro-2H-1-benzopyran-6-ol	n/a	C27H44O2	400.334	M	0	400.334	1
400.335	HMDB0172275	2,7-dimethyl-2-(4,8,12-trimethyltridec-12-en-1-yl)-3,4-dihydro-2H-1-benzopyran-6-ol	n/a	C27H44O2	400.334	M	0	400.334	1
400.335	HMDB0174260	14-(1-hydroxy-6-methylheptan-2-yl)-2,15-dimethyltetracyclo[8.7.0.0ﾂｲ,竅ｷ.0ﾂｹﾂｹ,ﾂｹ竅ｵ]heptadec-9-en-5-one	n/a	C27H44O2	400.334	M	0	400.334	1
400.335	HMDB0174261	17-hydroxy-2,15-dimethyl-14-(6-methylheptan-2-yl)tetracyclo[8.7.0.0ﾂｲ,竅ｷ.0ﾂｹﾂｹ,ﾂｹ竅ｵ]heptadec-9-en-5-one	n/a	C27H44O2	400.334	M	0	400.334	1
400.335	HMDB0174262	8-hydroxy-2,15-dimethyl-14-(6-methylheptan-2-yl)tetracyclo[8.7.0.0ﾂｲ,竅ｷ.0ﾂｹﾂｹ,ﾂｹ竅ｵ]heptadec-9-en-5-one	n/a	C27H44O2	400.334	M	0	400.334	1
400.335	HMDB0174263	13-hydroxy-2,15-dimethyl-14-(6-methylheptan-2-yl)tetracyclo[8.7.0.0ﾂｲ,竅ｷ.0ﾂｹﾂｹ,ﾂｹ竅ｵ]heptadec-9-en-5-one	n/a	C27H44O2	400.334	M	0	400.334	1
400.335	HMDB0174264	15-(hydroxymethyl)-2-methyl-14-(6-methylheptan-2-yl)tetracyclo[8.7.0.0ﾂｲ,竅ｷ.0ﾂｹﾂｹ,ﾂｹ竅ｵ]heptadec-9-en-5-one	n/a	C27H44O2	400.334	M	0	400.334	1
400.335	HMDB0174265	2-(hydroxymethyl)-15-methyl-14-(6-methylheptan-2-yl)tetracyclo[8.7.0.0ﾂｲ,竅ｷ.0ﾂｹﾂｹ,ﾂｹ竅ｵ]heptadec-9-en-5-one	n/a	C27H44O2	400.334	M	0	400.334	1
400.335	HMDB0174266	14-(2-hydroxy-6-methylheptan-2-yl)-2,15-dimethyltetracyclo[8.7.0.0ﾂｲ,竅ｷ.0ﾂｹﾂｹ,ﾂｹ竅ｵ]heptadec-9-en-5-one	n/a	C27H44O2	400.334	M	0	400.334	1
400.335	HMDB0174267	14-(6-hydroxy-6-methylheptan-2-yl)-2,15-dimethyltetracyclo[8.7.0.0ﾂｲ,竅ｷ.0ﾂｹﾂｹ,ﾂｹ竅ｵ]heptadec-9-en-5-one	n/a	C27H44O2	400.334	M	0	400.334	1
400.335	HMDB0174268	14-(7-hydroxy-6-methylheptan-2-yl)-2,15-dimethyltetracyclo[8.7.0.0ﾂｲ,竅ｷ.0ﾂｹﾂｹ,ﾂｹ竅ｵ]heptadec-9-en-5-one	n/a	C27H44O2	400.334	M	0	400.334	1
400.335	HMDB0184143	(2S,15S)-13-hydroxy-2,15-dimethyl-14-(6-methylheptan-2-yl)tetracyclo[8.7.0.0ﾂｲ,竅ｷ.0ﾂｹﾂｹ,ﾂｹ竅ｵ]heptadec-8-en-5-one	n/a	C27H44O2	400.334	M	0	400.334	1
400.335	HMDB0184144	(2S,15S)-14-(1-hydroxy-6-methylheptan-2-yl)-2,15-dimethyltetracyclo[8.7.0.0ﾂｲ,竅ｷ.0ﾂｹﾂｹ,ﾂｹ竅ｵ]heptadec-8-en-5-one	n/a	C27H44O2	400.334	M	0	400.334	1
400.335	HMDB0184145	(2R,15R)-2-(hydroxymethyl)-15-methyl-14-(6-methylheptan-2-yl)tetracyclo[8.7.0.0ﾂｲ,竅ｷ.0ﾂｹﾂｹ,ﾂｹ竅ｵ]heptadec-8-en-5-one	n/a	C27H44O2	400.334	M	0	400.334	1
400.335	HMDB0184146	(2S,15S)-15-(hydroxymethyl)-2-methyl-14-(6-methylheptan-2-yl)tetracyclo[8.7.0.0ﾂｲ,竅ｷ.0ﾂｹﾂｹ,ﾂｹ竅ｵ]heptadec-8-en-5-one	n/a	C27H44O2	400.334	M	0	400.334	1
400.335	HMDB0184147	(2S,15R)-14-(6-hydroxy-6-methylheptan-2-yl)-2,15-dimethyltetracyclo[8.7.0.0ﾂｲ,竅ｷ.0ﾂｹﾂｹ,ﾂｹ竅ｵ]heptadec-8-en-5-one	n/a	C27H44O2	400.334	M	0	400.334	1
400.335	HMDB0184148	(2S,15S)-14-(2-hydroxy-6-methylheptan-2-yl)-2,15-dimethyltetracyclo[8.7.0.0ﾂｲ,竅ｷ.0ﾂｹﾂｹ,ﾂｹ竅ｵ]heptadec-8-en-5-one	n/a	C27H44O2	400.334	M	0	400.334	1
400.335	HMDB0184149	(10R,14R)-10,14-dimethyl-15-(6-methylheptan-2-yl)-3-oxapentacyclo[9.7.0.0ﾂｲ,竅ｴ.0竅ｵ,ﾂｹ竅ｰ.0ﾂｹ竅ｴ,ﾂｹ竅ｸ]octadecan-7-one	n/a	C27H44O2	400.334	M	0	400.334	1
400.335	HMDB0184150	(2S,15R)-14-(7-hydroxy-6-methylheptan-2-yl)-2,15-dimethyltetracyclo[8.7.0.0ﾂｲ,竅ｷ.0ﾂｹﾂｹ,ﾂｹ竅ｵ]heptadec-8-en-5-one	n/a	C27H44O2	400.334	M	0	400.334	1
400.335	HMDB0184168	(2S,15R)-17-hydroxy-2,15-dimethyl-14-(6-methylheptan-2-yl)tetracyclo[8.7.0.0ﾂｲ,竅ｷ.0ﾂｹﾂｹ,ﾂｹ竅ｵ]heptadec-8-en-5-one	n/a	C27H44O2	400.334	M	0	400.334	1
400.335	HMDB0184841	(1S,2R,10S,11S,15S)-14-(1-hydroxy-6-methylhept-5-en-2-yl)-2,15-dimethyltetracyclo[8.7.0.0ﾂｲ,竅ｷ.0ﾂｹﾂｹ,ﾂｹ竅ｵ]heptadec-7-en-5-ol	n/a	C27H44O2	400.334	M	0	400.334	1
400.335	HMDB0184842	(1S,2R,10S,11S,15R)-2,15-dimethyl-14-(6-methylhept-5-en-2-yl)tetracyclo[8.7.0.0ﾂｲ,竅ｷ.0ﾂｹﾂｹ,ﾂｹ竅ｵ]heptadec-7-ene-5,17-diol	n/a	C27H44O2	400.334	M	0	400.334	1
400.335	HMDB0184843	(1S,2R,10S,11S,15S)-2,15-dimethyl-14-(6-methylhept-5-en-2-yl)tetracyclo[8.7.0.0ﾂｲ,竅ｷ.0ﾂｹﾂｹ,ﾂｹ竅ｵ]heptadec-7-ene-5,13-diol	n/a	C27H44O2	400.334	M	0	400.334	1
400.335	HMDB0184844	(1S,2S,10S,11S,15R)-2-(hydroxymethyl)-15-methyl-14-(6-methylhept-5-en-2-yl)tetracyclo[8.7.0.0ﾂｲ,竅ｷ.0ﾂｹﾂｹ,ﾂｹ竅ｵ]heptadec-7-en-5-ol	n/a	C27H44O2	400.334	M	0	400.334	1
400.335	HMDB0184845	(1S,2R,10R,11S,15S)-15-(hydroxymethyl)-2-methyl-14-(6-methylhept-5-en-2-yl)tetracyclo[8.7.0.0ﾂｲ,竅ｷ.0ﾂｹﾂｹ,ﾂｹ竅ｵ]heptadec-7-en-5-ol	n/a	C27H44O2	400.334	M	0	400.334	1
400.335	HMDB0184846	(1S,2R,10S,11S,15S)-14-(2-hydroxy-6-methylhept-5-en-2-yl)-2,15-dimethyltetracyclo[8.7.0.0ﾂｲ,竅ｷ.0ﾂｹﾂｹ,ﾂｹ竅ｵ]heptadec-7-en-5-ol	n/a	C27H44O2	400.334	M	0	400.334	1
400.335	HMDB0184847	(1S,2R,10S,11S,15R)-2,15-dimethyl-14-(6-methylhept-5-en-2-yl)tetracyclo[8.7.0.0ﾂｲ,竅ｷ.0ﾂｹﾂｹ,ﾂｹ竅ｵ]heptadec-7-ene-5,6-diol	n/a	C27H44O2	400.334	M	0	400.334	1
400.335	HMDB0184848	(1S,2R,10S,11S,15R)-14-(7-hydroxy-6-methylhept-5-en-2-yl)-2,15-dimethyltetracyclo[8.7.0.0ﾂｲ,竅ｷ.0ﾂｹﾂｹ,ﾂｹ竅ｵ]heptadec-7-en-5-ol	n/a	C27H44O2	400.334	M	0	400.334	1
400.335	HMDB0184849	(1S,2R,10S,11S,15R)-2,15-dimethyl-14-(6-methylhept-5-en-2-yl)tetracyclo[8.7.0.0ﾂｲ,竅ｷ.0ﾂｹﾂｹ,ﾂｹ竅ｵ]heptadec-7-ene-5,9-diol	n/a	C27H44O2	400.334	M	0	400.334	1
400.335	HMDB0184850	(1S,2R,10S,11S,15R)-14-(4-hydroxy-6-methylhept-5-en-2-yl)-2,15-dimethyltetracyclo[8.7.0.0ﾂｲ,竅ｷ.0ﾂｹﾂｹ,ﾂｹ竅ｵ]heptadec-7-en-5-ol	n/a	C27H44O2	400.334	M	0	400.334	1
400.335	HMDB0184851	(1S,2R,10S,11S,15R)-14-[4-(3,3-dimethyloxiran-2-yl)butan-2-yl]-2,15-dimethyltetracyclo[8.7.0.0ﾂｲ,竅ｷ.0ﾂｹﾂｹ,ﾂｹ竅ｵ]heptadec-7-en-5-ol	n/a	C27H44O2	400.334	M	0	400.334	1
400.335	HMDB0185577	(2R)-2-(4,12-dimethyl-8-methylidenetridecyl)-2,8-dimethyl-3,4-dihydro-2H-1-benzopyran-6-ol	n/a	C27H44O2	400.334	M	0	400.334	1
400.335	HMDB0185578	(2R)-2,8-dimethyl-2-(4,8,12-trimethyltridec-12-en-1-yl)-3,4-dihydro-2H-1-benzopyran-6-ol	n/a	C27H44O2	400.334	M	0	400.334	1
416.328	HMDB0000430	24,25-Dihydroxyvitamin D	n/a	C27H44O3	416.329	M	0	416.329	1
416.328	HMDB0001420	25,26-dihydroxyvitamin D	n/a	C27H44O3	416.329	M	0	416.329	1
416.328	HMDB0001903	Calcitriol	C01673	C27H44O3	416.329	M	0	416.329	1
416.328	HMDB0002197	7a,12a-Dihydroxy-cholestene-3-one	C05457	C27H44O3	416.329	M	0	416.329	1
416.328	HMDB0006226	(24R)-24,25-dihydroxycalciol	n/a	C27H44O3	416.329	M	0	416.329	1
416.328	HMDB0006720	23S,25-dihydroxyvitamin D3	n/a	C27H44O3	416.329	M	0	416.329	1
416.328	HMDB0012453	3beta-Hydroxy-5-cholestenoic acid	C17333	C27H44O3	416.329	M	0	416.329	1
416.328	HMDB0012457	PC(20:2(11Z,14Z)/18:1(11Z))	n/a	C27H44O3	416.329	M	0	416.329	1
416.328	HMDB0012459	7 alpha,26-Dihydroxy-4-cholesten-3-one	C17336	C27H44O3	416.329	M	0	416.329	1
416.328	HMDB0015046	Paricalcitol	C08127	C27H44O3	416.329	M	0	416.329	1
416.328	HMDB0030024	Sarsasapogenin	C03963	C27H44O3	416.329	M	0	416.329	1
416.328	HMDB0030047	Neogrifolin	n/a	C27H44O3	416.329	M	0	416.329	1
416.328	HMDB0030048	Smilagenin	C08913	C27H44O3	416.329	M	0	416.329	1
416.328	HMDB0035300	Octadecyl cis-p-coumarate	n/a	C27H44O3	416.329	M	0	416.329	1
416.328	HMDB0060425	7alpha,25-Dihydroxy-4-cholesten-3-one	C17332	C27H44O3	416.329	M	0	416.329	1
416.328	HMDB0060508	Secalciferol	n/a	C27H44O3	416.329	M	0	416.329	1
416.328	HMDB0062401	7alpha,24-dihydroxycholest-4-en-3-one	C17331	C27H44O3	416.329	M	0	416.329	1
416.328	HMDB0062610	(25R)-7alpha,26-dihydroxycholest-4-en-3-one	n/a	C27H44O3	416.329	M	0	416.329	1
416.328	HMDB0062736	(25R)-3beta,4beta-dihydroxycholest-5-en-26-al	n/a	C27H44O3	416.329	M	0	416.329	1
416.328	HMDB0159642	(1S,2R,10S,11S,15R)-5-hydroxy-14-(1-hydroxy-6-methylheptan-2-yl)-2,15-dimethyltetracyclo[8.7.0.0ﾂｲ,竅ｷ.0ﾂｹﾂｹ,ﾂｹ竅ｵ]heptadec-7-en-9-one	n/a	C27H44O3	416.329	M	0	416.329	1
416.328	HMDB0159643	(1S,2R,10S,11S,15R)-5,17-dihydroxy-2,15-dimethyl-14-(6-methylheptan-2-yl)tetracyclo[8.7.0.0ﾂｲ,竅ｷ.0ﾂｹﾂｹ,ﾂｹ竅ｵ]heptadec-7-en-9-one	n/a	C27H44O3	416.329	M	0	416.329	1
416.328	HMDB0159644	(1S,2R,10S,11S,15S)-5,13-dihydroxy-2,15-dimethyl-14-(6-methylheptan-2-yl)tetracyclo[8.7.0.0ﾂｲ,竅ｷ.0ﾂｹﾂｹ,ﾂｹ竅ｵ]heptadec-7-en-9-one	n/a	C27H44O3	416.329	M	0	416.329	1
416.328	HMDB0159645	(1S,2S,10S,11S,15R)-5-hydroxy-2-(hydroxymethyl)-15-methyl-14-(6-methylheptan-2-yl)tetracyclo[8.7.0.0ﾂｲ,竅ｷ.0ﾂｹﾂｹ,ﾂｹ竅ｵ]heptadec-7-en-9-one	n/a	C27H44O3	416.329	M	0	416.329	1
416.328	HMDB0159646	(1S,2R,10R,11S,15S)-5-hydroxy-15-(hydroxymethyl)-2-methyl-14-(6-methylheptan-2-yl)tetracyclo[8.7.0.0ﾂｲ,竅ｷ.0ﾂｹﾂｹ,ﾂｹ竅ｵ]heptadec-7-en-9-one	n/a	C27H44O3	416.329	M	0	416.329	1
416.328	HMDB0159647	(1S,2R,10S,11S,15R)-5-hydroxy-14-(6-hydroxy-6-methylheptan-2-yl)-2,15-dimethyltetracyclo[8.7.0.0ﾂｲ,竅ｷ.0ﾂｹﾂｹ,ﾂｹ竅ｵ]heptadec-7-en-9-one	n/a	C27H44O3	416.329	M	0	416.329	1
416.328	HMDB0159648	(1S,2R,10S,11S,15S)-5-hydroxy-14-(2-hydroxy-6-methylheptan-2-yl)-2,15-dimethyltetracyclo[8.7.0.0ﾂｲ,竅ｷ.0ﾂｹﾂｹ,ﾂｹ竅ｵ]heptadec-7-en-9-one	n/a	C27H44O3	416.329	M	0	416.329	1
416.328	HMDB0159649	(1S,2R,10S,11S,15R)-5,6-dihydroxy-2,15-dimethyl-14-(6-methylheptan-2-yl)tetracyclo[8.7.0.0ﾂｲ,竅ｷ.0ﾂｹﾂｹ,ﾂｹ竅ｵ]heptadec-7-en-9-one	n/a	C27H44O3	416.329	M	0	416.329	1
416.328	HMDB0159650	(1S,2R,10S,11S,15R)-5-hydroxy-14-(7-hydroxy-6-methylheptan-2-yl)-2,15-dimethyltetracyclo[8.7.0.0ﾂｲ,竅ｷ.0ﾂｹﾂｹ,ﾂｹ竅ｵ]heptadec-7-en-9-one	n/a	C27H44O3	416.329	M	0	416.329	1
416.328	HMDB0162231	Neotigonenin	n/a	C27H44O3	416.329	M	0	416.329	1
416.328	HMDB0172935	14-(1-hydroxy-6-methylheptan-2-yl)-2,15-dimethyltetracyclo[8.7.0.0ﾂｲ,竅ｷ.0ﾂｹﾂｹ,ﾂｹ竅ｵ]heptadeca-1(10),11-diene-5,8-diol	n/a	C27H44O3	416.329	M	0	416.329	1
416.328	HMDB0172936	2,15-dimethyl-14-(6-methylheptan-2-yl)tetracyclo[8.7.0.0ﾂｲ,竅ｷ.0ﾂｹﾂｹ,ﾂｹ竅ｵ]heptadeca-1(10),11-diene-5,8,17-triol	n/a	C27H44O3	416.329	M	0	416.329	1
416.328	HMDB0174269	8-hydroxy-14-(1-hydroxy-6-methylheptan-2-yl)-2,15-dimethyltetracyclo[8.7.0.0ﾂｲ,竅ｷ.0ﾂｹﾂｹ,ﾂｹ竅ｵ]heptadec-9-en-5-one	n/a	C27H44O3	416.329	M	0	416.329	1
416.328	HMDB0174270	13-hydroxy-14-(1-hydroxy-6-methylheptan-2-yl)-2,15-dimethyltetracyclo[8.7.0.0ﾂｲ,竅ｷ.0ﾂｹﾂｹ,ﾂｹ竅ｵ]heptadec-9-en-5-one	n/a	C27H44O3	416.329	M	0	416.329	1
416.328	HMDB0174271	14-(1-hydroxy-6-methylheptan-2-yl)-15-(hydroxymethyl)-2-methyltetracyclo[8.7.0.0ﾂｲ,竅ｷ.0ﾂｹﾂｹ,ﾂｹ竅ｵ]heptadec-9-en-5-one	n/a	C27H44O3	416.329	M	0	416.329	1
416.328	HMDB0174272	14-(1-hydroxy-6-methylheptan-2-yl)-2-(hydroxymethyl)-15-methyltetracyclo[8.7.0.0ﾂｲ,竅ｷ.0ﾂｹﾂｹ,ﾂｹ竅ｵ]heptadec-9-en-5-one	n/a	C27H44O3	416.329	M	0	416.329	1
416.328	HMDB0174273	14-(1,6-dihydroxy-6-methylheptan-2-yl)-2,15-dimethyltetracyclo[8.7.0.0ﾂｲ,竅ｷ.0ﾂｹﾂｹ,ﾂｹ竅ｵ]heptadec-9-en-5-one	n/a	C27H44O3	416.329	M	0	416.329	1
416.328	HMDB0174274	14-(1,7-dihydroxy-6-methylheptan-2-yl)-2,15-dimethyltetracyclo[8.7.0.0ﾂｲ,竅ｷ.0ﾂｹﾂｹ,ﾂｹ竅ｵ]heptadec-9-en-5-one	n/a	C27H44O3	416.329	M	0	416.329	1
416.328	HMDB0174275	14-(1,2-dihydroxy-6-methylheptan-2-yl)-2,15-dimethyltetracyclo[8.7.0.0ﾂｲ,竅ｷ.0ﾂｹﾂｹ,ﾂｹ竅ｵ]heptadec-9-en-5-one	n/a	C27H44O3	416.329	M	0	416.329	1
416.328	HMDB0174276	8,17-dihydroxy-2,15-dimethyl-14-(6-methylheptan-2-yl)tetracyclo[8.7.0.0ﾂｲ,竅ｷ.0ﾂｹﾂｹ,ﾂｹ竅ｵ]heptadec-9-en-5-one	n/a	C27H44O3	416.329	M	0	416.329	1
416.328	HMDB0174277	13,17-dihydroxy-2,15-dimethyl-14-(6-methylheptan-2-yl)tetracyclo[8.7.0.0ﾂｲ,竅ｷ.0ﾂｹﾂｹ,ﾂｹ竅ｵ]heptadec-9-en-5-one	n/a	C27H44O3	416.329	M	0	416.329	1
416.328	HMDB0174278	17-hydroxy-14-(1-hydroxy-6-methylheptan-2-yl)-2,15-dimethyltetracyclo[8.7.0.0ﾂｲ,竅ｷ.0ﾂｹﾂｹ,ﾂｹ竅ｵ]heptadec-9-en-5-one	n/a	C27H44O3	416.329	M	0	416.329	1
416.328	HMDB0174279	17-hydroxy-15-(hydroxymethyl)-2-methyl-14-(6-methylheptan-2-yl)tetracyclo[8.7.0.0ﾂｲ,竅ｷ.0ﾂｹﾂｹ,ﾂｹ竅ｵ]heptadec-9-en-5-one	n/a	C27H44O3	416.329	M	0	416.329	1
416.328	HMDB0174280	17-hydroxy-2-(hydroxymethyl)-15-methyl-14-(6-methylheptan-2-yl)tetracyclo[8.7.0.0ﾂｲ,竅ｷ.0ﾂｹﾂｹ,ﾂｹ竅ｵ]heptadec-9-en-5-one	n/a	C27H44O3	416.329	M	0	416.329	1
416.328	HMDB0174281	17-hydroxy-14-(2-hydroxy-6-methylheptan-2-yl)-2,15-dimethyltetracyclo[8.7.0.0ﾂｲ,竅ｷ.0ﾂｹﾂｹ,ﾂｹ竅ｵ]heptadec-9-en-5-one	n/a	C27H44O3	416.329	M	0	416.329	1
416.328	HMDB0174282	17-hydroxy-14-(6-hydroxy-6-methylheptan-2-yl)-2,15-dimethyltetracyclo[8.7.0.0ﾂｲ,竅ｷ.0ﾂｹﾂｹ,ﾂｹ竅ｵ]heptadec-9-en-5-one	n/a	C27H44O3	416.329	M	0	416.329	1
416.328	HMDB0174283	17-hydroxy-14-(7-hydroxy-6-methylheptan-2-yl)-2,15-dimethyltetracyclo[8.7.0.0ﾂｲ,竅ｷ.0ﾂｹﾂｹ,ﾂｹ竅ｵ]heptadec-9-en-5-one	n/a	C27H44O3	416.329	M	0	416.329	1
432.323	HMDB0006228	24-Hydroxycalcitriol	n/a	C27H44O4	432.324	M	0	432.324	2
432.323	HMDB0012454	3beta,7alpha-Dihydroxy-5-cholestenoate	C17335	C27H44O4	432.324	M	0	432.324	2
432.323	HMDB0030702	Neochlorogenin	n/a	C27H44O4	432.324	M	0	432.324	2
432.323	HMDB0033769	Halofuginone	n/a	C27H44O4	432.324	M	0	432.324	2
432.323	HMDB0060134	23S,25,26-Trihydroxyvitamin D3	n/a	C27H44O4	432.324	M	0	432.324	2
432.323	HMDB0062399	7alpha,12alpha,24-trihydroxycholest-4-en-3-one	n/a	C27H44O4	432.324	M	0	432.324	2
432.323	HMDB0062400	7alpha,12alpha,26-trihydroxycholest-4-en-3-one	n/a	C27H44O4	432.324	M	0	432.324	2
432.323	HMDB0062686	1alpha,23(S),25-trihydroxyvitamin D3	n/a	C27H44O4	432.324	M	0	432.324	2
432.323	HMDB0062712	3alpha,7beta-dihydroxy-5beta-cholest-24-en-26-oic acid	n/a	C27H44O4	432.324	M	0	432.324	2
432.323	HMDB0062794	6-{5,6-dihydroxy-2,15-dimethyltetracyclo[8.7.0.0,.0,]heptadec-7-en-14-yl}-2-methylheptanoic acid	n/a	C27H44O4	432.324	M	0	432.324	2
432.323	HMDB0157615	6-[(1S,2S,7R,11S,14R,15R)-9-hydroxy-2,15-dimethyl-5-oxotetracyclo[8.7.0.0ﾂｲ,竅ｷ.0ﾂｹﾂｹ,ﾂｹ竅ｵ]heptadecan-14-yl]-2-methylheptanoic acid	n/a	C27H44O4	432.324	M	0	432.324	2
432.323	HMDB0157616	6-[(1S,2S,7S,11S,14R,15R)-5-hydroxy-2,15-dimethyl-9-oxotetracyclo[8.7.0.0ﾂｲ,竅ｷ.0ﾂｹﾂｹ,ﾂｹ竅ｵ]heptadecan-14-yl]-2-methylheptanoic acid	n/a	C27H44O4	432.324	M	0	432.324	2
432.323	HMDB0157629	6-[(1S,2S,7S,11S,14R,15R)-5,9-dihydroxy-2,15-dimethyltetracyclo[8.7.0.0ﾂｲ,竅ｷ.0ﾂｹﾂｹ,ﾂｹ竅ｵ]heptadecan-14-yl]-2-methylideneheptanoic acid	n/a	C27H44O4	432.324	M	0	432.324	2
432.323	HMDB0157630	6-[(1S,2S,7S,11S,14R,15S)-5,9-dihydroxy-2,15-dimethyltetracyclo[8.7.0.0ﾂｲ,竅ｷ.0ﾂｹﾂｹ,ﾂｹ竅ｵ]heptadecan-14-yl]-2-methylhept-6-enoic acid	n/a	C27H44O4	432.324	M	0	432.324	2
432.323	HMDB0159668	(2R,15S)-5,13-dihydroxy-14-(1-hydroxy-6-methylheptan-2-yl)-2,15-dimethyltetracyclo[8.7.0.0ﾂｲ,竅ｷ.0ﾂｹﾂｹ,ﾂｹ竅ｵ]heptadec-7-en-9-one	n/a	C27H44O4	432.324	M	0	432.324	2
432.323	HMDB0159669	(2S,15R)-5-hydroxy-14-(1-hydroxy-6-methylheptan-2-yl)-2-(hydroxymethyl)-15-methyltetracyclo[8.7.0.0ﾂｲ,竅ｷ.0ﾂｹﾂｹ,ﾂｹ竅ｵ]heptadec-7-en-9-one	n/a	C27H44O4	432.324	M	0	432.324	2
432.323	HMDB0159670	(2R,15S)-5-hydroxy-14-(1-hydroxy-6-methylheptan-2-yl)-15-(hydroxymethyl)-2-methyltetracyclo[8.7.0.0ﾂｲ,竅ｷ.0ﾂｹﾂｹ,ﾂｹ竅ｵ]heptadec-7-en-9-one	n/a	C27H44O4	432.324	M	0	432.324	2
432.323	HMDB0159671	(2R,15R)-14-(1,6-dihydroxy-6-methylheptan-2-yl)-5-hydroxy-2,15-dimethyltetracyclo[8.7.0.0ﾂｲ,竅ｷ.0ﾂｹﾂｹ,ﾂｹ竅ｵ]heptadec-7-en-9-one	n/a	C27H44O4	432.324	M	0	432.324	2
432.323	HMDB0159672	(2R,15R)-5,6-dihydroxy-14-(1-hydroxy-6-methylheptan-2-yl)-2,15-dimethyltetracyclo[8.7.0.0ﾂｲ,竅ｷ.0ﾂｹﾂｹ,ﾂｹ竅ｵ]heptadec-7-en-9-one	n/a	C27H44O4	432.324	M	0	432.324	2
432.323	HMDB0159673	(2R,15R)-5,12-dihydroxy-14-(1-hydroxy-6-methylheptan-2-yl)-2,15-dimethyltetracyclo[8.7.0.0ﾂｲ,竅ｷ.0ﾂｹﾂｹ,ﾂｹ竅ｵ]heptadec-7-en-9-one	n/a	C27H44O4	432.324	M	0	432.324	2
432.323	HMDB0159675	(2R,15S)-14-(1,2-dihydroxy-6-methylheptan-2-yl)-5-hydroxy-2,15-dimethyltetracyclo[8.7.0.0ﾂｲ,竅ｷ.0ﾂｹﾂｹ,ﾂｹ竅ｵ]heptadec-7-en-9-one	n/a	C27H44O4	432.324	M	0	432.324	2
432.323	HMDB0159676	(2R,15R)-5,10-dihydroxy-14-(1-hydroxy-6-methylheptan-2-yl)-2,15-dimethyltetracyclo[8.7.0.0ﾂｲ,竅ｷ.0ﾂｹﾂｹ,ﾂｹ竅ｵ]heptadec-7-en-9-one	n/a	C27H44O4	432.324	M	0	432.324	2
432.323	HMDB0159677	(2R,15S)-5,13,17-trihydroxy-2,15-dimethyl-14-(6-methylheptan-2-yl)tetracyclo[8.7.0.0ﾂｲ,竅ｷ.0ﾂｹﾂｹ,ﾂｹ竅ｵ]heptadec-7-en-9-one	n/a	C27H44O4	432.324	M	0	432.324	2
432.323	HMDB0159678	(2R,15R)-5,17-dihydroxy-14-(1-hydroxy-6-methylheptan-2-yl)-2,15-dimethyltetracyclo[8.7.0.0ﾂｲ,竅ｷ.0ﾂｹﾂｹ,ﾂｹ竅ｵ]heptadec-7-en-9-one	n/a	C27H44O4	432.324	M	0	432.324	2
432.323	HMDB0159679	(2S,15R)-5,17-dihydroxy-2-(hydroxymethyl)-15-methyl-14-(6-methylheptan-2-yl)tetracyclo[8.7.0.0ﾂｲ,竅ｷ.0ﾂｹﾂｹ,ﾂｹ竅ｵ]heptadec-7-en-9-one	n/a	C27H44O4	432.324	M	0	432.324	2
432.323	HMDB0159680	(2R,15S)-5,17-dihydroxy-15-(hydroxymethyl)-2-methyl-14-(6-methylheptan-2-yl)tetracyclo[8.7.0.0ﾂｲ,竅ｷ.0ﾂｹﾂｹ,ﾂｹ竅ｵ]heptadec-7-en-9-one	n/a	C27H44O4	432.324	M	0	432.324	2
432.323	HMDB0159681	(2R,15R)-5,17-dihydroxy-14-(6-hydroxy-6-methylheptan-2-yl)-2,15-dimethyltetracyclo[8.7.0.0ﾂｲ,竅ｷ.0ﾂｹﾂｹ,ﾂｹ竅ｵ]heptadec-7-en-9-one	n/a	C27H44O4	432.324	M	0	432.324	2
432.323	HMDB0159682	(2R,15S)-5,17-dihydroxy-14-(2-hydroxy-6-methylheptan-2-yl)-2,15-dimethyltetracyclo[8.7.0.0ﾂｲ,竅ｷ.0ﾂｹﾂｹ,ﾂｹ竅ｵ]heptadec-7-en-9-one	n/a	C27H44O4	432.324	M	0	432.324	2
432.323	HMDB0159683	(2R,15R)-5,6,17-trihydroxy-2,15-dimethyl-14-(6-methylheptan-2-yl)tetracyclo[8.7.0.0ﾂｲ,竅ｷ.0ﾂｹﾂｹ,ﾂｹ竅ｵ]heptadec-7-en-9-one	n/a	C27H44O4	432.324	M	0	432.324	2
432.323	HMDB0159684	(2R,15R)-5,17-dihydroxy-14-(7-hydroxy-6-methylheptan-2-yl)-2,15-dimethyltetracyclo[8.7.0.0ﾂｲ,竅ｷ.0ﾂｹﾂｹ,ﾂｹ竅ｵ]heptadec-7-en-9-one	n/a	C27H44O4	432.324	M	0	432.324	2
477.285	HMDB0011477	LysoPE(0:0/18:2(9Z,12Z))	n/a	C23H44NO7P	477.286	M	0	477.286	2
477.285	HMDB0011507	LysoPE(18:2(9Z,12Z)/0:0)	n/a	C23H44NO7P	477.286	M	0	477.286	2
506.343	HMDB0156164	{[(6E,10E,14E,18Z)-2,6,10,15,19,23-hexamethyltetracosa-2,6,10,14,18,22-hexaen-1-yl]oxy}sulfonic acid	n/a	C30H50O4S	506.343	M	0	506.343	1
506.343	HMDB0156166	{[(2Z,6E,10E,14Z)-6,11,15,19-tetramethyl-2-(4-methylpent-3-en-1-yl)icosa-2,6,10,14,18-pentaen-1-yl]oxy}sulfonic acid	n/a	C30H50O4S	506.343	M	0	506.343	1
506.343	HMDB0156168	{[(6E,10E,14E,18Z)-2,6,10,15,19,23-hexamethyltetracosa-2,6,10,14,18,22-hexaen-5-yl]oxy}sulfonic acid	n/a	C30H50O4S	506.343	M	0	506.343	1
506.343	HMDB0156170	{[(2Z,6E,10Z)-2-[(3E)-4,8-dimethylnona-3,7-dien-1-yl]-7,11,15-trimethylhexadeca-2,6,10,14-tetraen-1-yl]oxy}sulfonic acid	n/a	C30H50O4S	506.343	M	0	506.343	1
506.343	HMDB0156172	{[(6E,10E,14E,18Z)-2,6,10,15,19,23-hexamethyltetracosa-2,6,10,14,18,22-hexaen-9-yl]oxy}sulfonic acid	n/a	C30H50O4S	506.343	M	0	506.343	1
506.343	HMDB0156174	{[(6Z,10E,14E,18E)-2,6,10,15,19,23-hexamethyltetracosa-2,6,10,14,18,22-hexaen-9-yl]oxy}sulfonic acid	n/a	C30H50O4S	506.343	M	0	506.343	1
506.343	HMDB0156176	{[(2Z,6E,10E)-2-[(3Z)-4,8-dimethylnona-3,7-dien-1-yl]-7,11,15-trimethylhexadeca-2,6,10,14-tetraen-1-yl]oxy}sulfonic acid	n/a	C30H50O4S	506.343	M	0	506.343	1
506.343	HMDB0156178	{[(6Z,10E,14E,18E)-2,6,10,15,19,23-hexamethyltetracosa-2,6,10,14,18,22-hexaen-5-yl]oxy}sulfonic acid	n/a	C30H50O4S	506.343	M	0	506.343	1
506.343	HMDB0156180	{[(2E,6E,10E,14E)-6,11,15,19-tetramethyl-2-(4-methylpent-3-en-1-yl)icosa-2,6,10,14,18-pentaen-1-yl]oxy}sulfonic acid	n/a	C30H50O4S	506.343	M	0	506.343	1
506.343	HMDB0156182	{[(6Z,10E,14E,18E)-2,6,10,15,19,23-hexamethyltetracosa-2,6,10,14,18,22-hexaen-1-yl]oxy}sulfonic acid	n/a	C30H50O4S	506.343	M	0	506.343	1
506.343	HMDB0156184	{[(2E,6Z,10E,14E,18E)-2,6,10,15,19,23-hexamethyltetracosa-2,6,10,14,18,22-hexaen-1-yl]oxy}sulfonic acid	n/a	C30H50O4S	506.343	M	0	506.343	1
506.343	HMDB0156186	{[(6E,10E,14E,18Z)-2,6,10,15,19,23-hexamethyltetracosa-2,6,10,14,18,22-hexaen-4-yl]oxy}sulfonic acid	n/a	C30H50O4S	506.343	M	0	506.343	1
506.343	HMDB0156188	{[(6E,10E,14E,18Z)-2,6,10,15,19,23-hexamethyltetracosa-2,6,10,14,18,22-hexaen-8-yl]oxy}sulfonic acid	n/a	C30H50O4S	506.343	M	0	506.343	1
506.343	HMDB0156190	{[(6E,10E,14E,18Z)-2,6,10,15,19,23-hexamethyltetracosa-2,6,10,14,18,22-hexaen-12-yl]oxy}sulfonic acid	n/a	C30H50O4S	506.343	M	0	506.343	1
506.343	HMDB0156192	{[(6Z,10E,14E,18E)-2,6,10,15,19,23-hexamethyltetracosa-2,6,10,14,18,22-hexaen-12-yl]oxy}sulfonic acid	n/a	C30H50O4S	506.343	M	0	506.343	1
506.343	HMDB0156194	{[(6Z,10E,14E,18E)-2,6,10,15,19,23-hexamethyltetracosa-2,6,10,14,18,22-hexaen-8-yl]oxy}sulfonic acid	n/a	C30H50O4S	506.343	M	0	506.343	1
506.343	HMDB0156196	{[(6Z,10E,14E,18E)-2,6,10,15,19,23-hexamethyltetracosa-2,6,10,14,18,22-hexaen-4-yl]oxy}sulfonic acid	n/a	C30H50O4S	506.343	M	0	506.343	1
506.343	HMDB0164097	[15-(5,6-dimethylhept-5-en-2-yl)-7,12,16-trimethylpentacyclo[9.7.0.0ﾂｹ,ﾂｳ.0ﾂｳ,竅ｸ.0ﾂｹﾂｲ,ﾂｹ竅ｶ]octadecan-6-yl]oxidanesulfonic acid	n/a	C30H50O4S	506.343	M	0	506.343	1
506.343	HMDB0164123	[14-(5,6-dimethylhept-5-en-2-yl)-2,6,11,15-tetramethyltetracyclo[8.7.0.0ﾂｲ,竅ｷ.0ﾂｹﾂｹ,ﾂｹ竅ｵ]heptadec-1(10)-en-5-yl]oxidanesulfonic acid	n/a	C30H50O4S	506.343	M	0	506.343	1
506.343	HMDB0165335	[14-(6,6-dimethyl-5-methylideneheptan-2-yl)-2,6,15-trimethyltetracyclo[8.7.0.0ﾂｲ,竅ｷ.0ﾂｹﾂｹ,ﾂｹ竅ｵ]heptadec-9-en-5-yl]oxidanesulfonic acid	n/a	C30H50O4S	506.343	M	0	506.343	1
506.343	HMDB0169739	{2,15-dimethyl-14-[(5Z)-5-(propan-2-yl)oct-5-en-2-yl]tetracyclo[8.7.0.0ﾂｲ,竅ｷ.0ﾂｹﾂｹ,ﾂｹ竅ｵ]heptadec-7-en-5-yl}oxidanesulfonic acid	n/a	C30H50O4S	506.343	M	0	506.343	1
506.343	HMDB0173206	{2,6,15-trimethyl-14-[(5Z)-5-(propan-2-yl)hept-5-en-2-yl]tetracyclo[8.7.0.0ﾂｲ,竅ｷ.0ﾂｹﾂｹ,ﾂｹ竅ｵ]heptadec-10-en-5-yl}oxidanesulfonic acid	n/a	C30H50O4S	506.343	M	0	506.343	1
506.343	HMDB0181684	(4,4,6a,8a,11,11,12b,14b-octamethyl-1,2,3,4,4a,5,6,6a,8,8a,9,10,11,12,12a,12b,13,14,14a,14b-icosahydropicen-3-yl)oxidanesulfonic acid	n/a	C30H50O4S	506.343	M	0	506.343	1
506.343	HMDB0181823	[2,6,6,11,15-pentamethyl-14-(6-methylhept-5-en-2-yl)tetracyclo[8.7.0.0ﾂｲ,竅ｷ.0ﾂｹﾂｹ,ﾂｹ竅ｵ]heptadec-9-en-5-yl]oxidanesulfonic acid	n/a	C30H50O4S	506.343	M	0	506.343	1
508.28	HMDB0240600	Pg(18:2(9z,12z)/0:0)	n/a	C24H45O9P	508.28	M	0	508.28	0
510.465	HMDB0032494	Propylene glycol mono- and diesters of fats and fatty acids	n/a	C32H62O4	510.465	M	0	510.465	0
510.465	HMDB0112110	Fahfa(16:0/9-o-16:0)	n/a	C32H62O4	510.465	M	0	510.465	0
510.465	HMDB0112114	Fahfa(16:0/5-o-16:0)	n/a	C32H62O4	510.465	M	0	510.465	0
510.465	HMDB0112115	Fahfa(16:0/7-o-16:0)	n/a	C32H62O4	510.465	M	0	510.465	0
510.465	HMDB0112123	Fahfa(16:0/8-o-16:0)	n/a	C32H62O4	510.465	M	0	510.465	0
510.465	HMDB0112124	Fahfa(16:0/10-o-16:0)	n/a	C32H62O4	510.465	M	0	510.465	0
510.465	HMDB0112125	Fahfa(16:0/11-o-16:0)	n/a	C32H62O4	510.465	M	0	510.465	0
510.465	HMDB0112126	Fahfa(16:0/12-o-16:0)	n/a	C32H62O4	510.465	M	0	510.465	0
510.465	HMDB0112127	Fahfa(16:0/13-o-16:0)	n/a	C32H62O4	510.465	M	0	510.465	0
510.465	HMDB0112178	6-(hexadecanoyloxy)hexadecanoic acid	n/a	C32H62O4	510.465	M	0	510.465	0
566.528	HMDB0112112	9-(octadecanoyloxy)octadecanoic acid	n/a	C36H70O4	566.527	M	0	566.527	1
566.528	HMDB0112120	12-(octadecanoyloxy)octadecanoic acid	n/a	C36H70O4	566.527	M	0	566.527	1
566.528	HMDB0112128	Fahfa(18:0/5-o-18:0)	n/a	C36H70O4	566.527	M	0	566.527	1
566.528	HMDB0112129	Fahfa(18:0/7-o-18:0)	n/a	C36H70O4	566.527	M	0	566.527	1
566.528	HMDB0112130	Fahfa(18:0/8-o-18:0)	n/a	C36H70O4	566.527	M	0	566.527	1
566.528	HMDB0112131	Fahfa(18:0/10-o-18:0)	n/a	C36H70O4	566.527	M	0	566.527	1
566.528	HMDB0112132	Fahfa(18:0/11-o-18:0)	n/a	C36H70O4	566.527	M	0	566.527	1
566.528	HMDB0112133	13-(octadecanoyloxy)octadecanoic acid	n/a	C36H70O4	566.527	M	0	566.527	1
566.528	HMDB0112177	6-(octadecanoyloxy)octadecanoic acid	n/a	C36H70O4	566.527	M	0	566.527	1
