# Supplementary material for: Multi-Omics Analysis to Generate Hypotheses for Mild Health Problems in Monkeys
Source: Metabolites. 2021 Oct 13;11(10):701. doi: 10.3390/metabo11100701 (PMC8538200; doi:10.3390/metabo11100701)
Supplement: Supplementary file 1 [file metabolites-11-00701-s001.zip › Suppl_Table_S5_Plasma-fatty acids-GC.xlsx]

## Sheet: Sheet1
Sample	C16:0	C16:1n-7	C17:0	C17:1n-7	C18:0	C18:1n-9	C18:2n-6	C18:3n-6	C18:3n-3	C20:0	C20:1n-9	C20:2n-6	C20:3n-6	C21:0	C20:4n-6	C20:3n-3	C20:5n-3	C22:0	C22:1n-9	C22:2n-6	C23:0	C24:0	C22:6n-3	C24:1n-9	C22:4n-6	C22:5n-6	C22:5n-3
Monkey 1	248.55	32.6409	8.54352	0	94.5008	183.038	302.971	3.48335	11.5708	0	1.18748	6.60755	26.6271	0	62.2392	16.5554	3.12366	0	0	0	5.03188	0	15.3628	0	2.81395	3.97411	4.13094
Monkey 2	225.795	20.7238	7.34474	0	144.011	148.993	404.912	2.50854	11.0029	0	1.91643	6.62398	22.0363	0	73.4699	12.3223	2.20303	0	0	0	4.8245	0	23.2238	0	4.97192	4.83651	5.06495
Monkey 3	145.55	6.67199	5.09338	0	90.2366	92.8035	336.047	1.40959	8.79347	0	1.42902	4.8993	9.37778	0	63.3308	13.9215	1.05117	0	0	0	3.55015	0	16.7039	0	2.41327	1.22473	2.86423
Monkey 4	140.446	11.0159	6.60959	0	73.7317	79.779	272.074	1.97935	9.05156	0	0.993743	4.15098	15.2409	0	56.7828	16.2359	1.09277	0	0	0	4.70256	0	14.3425	0	2.05845	2.37683	1.97565
Monkey 5	115.418	7.08111	3.49514	0	58.8869	61.2569	217.201	1.06351	6.47678	0	1.09652	3.09366	7.37792	0	45.5483	12.3625	0.531596	0	0	0	4.58561	0	15.7952	0	2.62862	2.3367	2.54866
Monkey 6	162.412	20.5875	5.24839	0	83.9005	99.0101	249.5	1.83804	8.52722	0	1.06879	5.28943	19.8564	0	38.3084	13.074	1.0725	0	0	0	4.87941	0	13.3858	0	2.44187	2.17788	2.26491
Monkey 7	177.13	10.7043	5.45848	0	84.7051	94.6861	327.533	1.299	11.7679	0	1.18956	5.35981	11.1661	0	56.3721	16.5587	0.750647	0	0	0	4.70117	0	16.6173	0	3.17967	2.1077	3.09274
Monkey 8	232.363	14.9737	9.29943	0	112.278	112.327	392.973	1.89403	12.4595	0	1.3569	6.05538	16.292	0	84.293	16.0118	1.56038	0	0	0	4.98822	0	25.6709	0	3.80598	2.71984	3.7834
Monkey 9	187.298	10.7426	7.05823	0	98.3296	90.8886	356.386	1.75919	10.9086	0	1.25295	5.52247	15.4915	0	79.4402	14.1299	1.23936	0	0	0	4.98129	0	20.4084	0	3.69493	2.96802	5.07272
Monkey 10	176.984	18.4662	8.07017	0	99.9716	99.1226	339.482	1.43079	10.9639	0	1.33705	6.14392	16.5553	0	56.3958	14.9342	2.18042	0	0	0	5.41861	0	13.8886	0	2.82926	1.68904	3.00327
Monkey 11	181.095	13.5348	6.23646	0	115.156	106.573	381.554	1.37615	10.7783	0	1.33394	4.28019	12.7242	0	52.707	13.8024	0.792567	0	0	0	5.15332	0	21.7184	0	2.47719	2.09091	2.92967
Monkey 12	197.037	19.0162	6.98912	0	126.718	111.818	427.466	1.16107	9.38175	0	1.32244	5.98452	14.6417	0	80.0104	10.1202	1.17195	0	0	0	4.68602	0	26.5066	0	4.57087	3.28266	4.88648
Monkey 13	121.746	6.95882	4.7499	0	69.7909	77.3103	249.551	1.31178	7.23535	0	1.22817	4.2476	11.3597	0	44.0819	12.8891	1.01193	0	0	0	4.71017	0	11.6432	0	2.62681	1.93872	2.2768
Monkey 14	137.952	10.4011	5.61156	0	90.1094	74.3335	260.052	1.09219	7.69801	0	1.0918	4.45717	15.2051	0	67.4885	15.1046	1.14981	0	0	0	4.432	0	27.2794	0	2.78042	2.16267	3.13409
Monkey 15	183.735	15.8607	5.8564	0	104.217	104.836	384.975	1.46538	9.90714	0	1.23834	4.76783	12.8326	0	97.8627	15.795	1.29392	0	0	0	4.77733	0	31.719	0	4.42032	3.88494	6.14447
Monkey 16	190.013	11.4053	5.43983	0	111.561	100.286	345.564	1.99311	9.50361	0	1.33191	5.25312	23.026	0	75.8243	14.946	1.27179	0	0	0	4.93022	0	21.9122	0	3.31252	2.79155	3.52118
Monkey 17	231.374	19.2593	7.25121	0	124.368	119.987	377.563	1.94024	10.4382	0	1.77093	6.15183	26.7311	0	92.2603	13.6732	2.289	0	0	0	4.69702	0	38.0893	0	3.51085	4.36428	4.7515
Monkey 18	218.431	15.0326	8.14033	0	133.759	132.015	440.394	2.07824	11.3012	0	1.58347	6.40867	13.3592	0	86.0807	14.0378	2.02898	0	0	0	4.87585	0	28.4565	0	4.30476	2.71013	5.11826
Monkey 19	233.278	14.4648	7.2542	0	123.795	117.691	466.251	2.91883	11.4018	0	1.86901	6.26143	20.5238	0	103.218	13.5827	2.86637	0	0	0	4.74533	0	26.2419	0	3.98991	4.61632	3.12826
Monkey 20	212.171	15.4317	5.05289	0	109.748	128.711	446.5	1.57052	11.3773	0	1.29064	5.88471	14.8048	0	53.735	11.429	1.23195	0	0	0	4.46603	0	17.1911	0	3.40041	1.66747	3.66221
Pearson Correlation with Stool Water	0.0192861	-0.168869	-0.218395	#DIV/0!	0.133233	-0.0911228	0.257448	-0.386775	0.158822	#DIV/0!	0.16828	0.00102074	-0.343929	#DIV/0!	-0.149675	-0.427033	-0.385547	#DIV/0!	#DIV/0!	#DIV/0!	-0.188191	#DIV/0!	-0.0144037	#DIV/0!	0.175015	-0.166508	0.023356
ｔ	0.0818392	-0.726888	-0.949492	#DIV/0!	0.570345	-0.388216	1.13036	-1.77943	0.682486	#DIV/0!	0.72428	0.00433064	-1.55397	#DIV/0!	-0.642253	-2.00362	-1.7728	#DIV/0!	#DIV/0!	#DIV/0!	-0.812951	#DIV/0!	-0.0611159	#DIV/0!	0.754168	-0.716437	0.0991179
p	0.935678	0.476642	0.354946	#DIV/0!	0.575494	0.702409	0.273161	0.0920591	0.503621	#DIV/0!	0.478203	0.996592	0.137598	#DIV/0!	0.528805	0.0603989	0.0931853	#DIV/0!	#DIV/0!	#DIV/0!	0.426869	#DIV/0!	0.95194	#DIV/0!	0.460502	0.482914	0.92214
Spearman Correlation with Stool Water	-0.0270677	0.0390977	-0.216541	#DIV/0!	0.138346	0.0796992	0.190977	-0.366917	0.130827	#DIV/0!	0.198496	0.0345865	-0.377444	#DIV/0!	-0.222556	-0.410526	-0.362406	#DIV/0!	#DIV/0!	#DIV/0!	-0.290226	#DIV/0!	-0.0165414	#DIV/0!	0.123308	-0.204511	-0.0165414
ｔ	-0.11488	0.166005	-0.941035	#DIV/0!	0.592651	0.339214	0.825441	-1.67341	0.559864	#DIV/0!	0.859246	0.146826	-1.72927	#DIV/0!	-0.968517	-1.91009	-1.6497	#DIV/0!	#DIV/0!	#DIV/0!	-1.2867	#DIV/0!	-0.0701886	#DIV/0!	0.527176	-0.886403	-0.0701886
p	0.909812	0.870004	0.359146	#DIV/0!	0.560787	0.738374	0.419927	0.111535	0.582473	#DIV/0!	0.401504	0.884902	0.100873	#DIV/0!	0.345621	0.0721872	0.116345	#DIV/0!	#DIV/0!	#DIV/0!	0.2145	#DIV/0!	0.944817	#DIV/0!	0.604509	0.38709	0.944817
