# Supplementary material for: Multi-Omics Analysis to Generate Hypotheses for Mild Health Problems in Monkeys
Source: Metabolites. 2021 Oct 13;11(10):701. doi: 10.3390/metabo11100701 (PMC8538200; doi:10.3390/metabo11100701)
Supplement: Supplementary file 1 [file metabolites-11-00701-s001.zip › Suppl_Table_S6_Food_lipidmics.xlsx]

## Sheet: Food_Lipidomics
	AcHexCmE(15:0)	AcHexCmE(18:2)	AcHexCmE(18:3)	AcHexSiE(16:0)	AcHexSiE(18:0)	AcHexStE(16:0)	AcHexStE(18:0)	AcHexStE(18:1)	AcHexStE(18:2)	BisMePA(18:2_18:2)	BisMePA(24:1_18:2)	Co(Q10)	Co(Q8)	Co(Q9)	DGMG(16:0)	DGMG(18:0)	DGMG(18:1)	DGMG(18:2)	DGMG(18:3)	DLCL(18:2_16:0)	Hex1Cer(d18:0_16:0+O)	Hex1Cer(d18:0_20:0+O)	Hex1Cer(d18:1_16:0+O)	Hex1Cer(d18:1_20:0+O)	Hex1Cer(d18:2_16:0+O)	Hex1Cer(d18:2_16:1)	Hex1Cer(d18:2_18:0+O)	Hex1Cer(d18:2_20:0+O)	Hex1Cer(d19:2_18:2)	Hex1Cer(d20:0_18:2)	Hex1Cer(t18:0_16:0+O)	Hex1Cer(t18:0_16:1)	Hex1Cer(t18:0_20:0+O)	Hex1Cer(t18:0_22:0+O)	Hex1Cer(t18:1_16:0+O)	Hex1Cer(t18:1_16:1)	Hex1Cer(t18:1_20:2)	Hex1Cer(t18:1_22:0+O)	Hex1Cer(t18:1_24:0+O)	Hex1Cer(t18:1_24:1)	Hex1SPH(t18:1)	LPA(14:0)	LPA(15:0)	LPA(16:0)	LPA(16:1)	LPA(17:0)	LPA(18:0)	LPA(18:1)	LPA(18:2)
Height	2.09e-06	8.19e-06	1.37e-06	1.42e-05	3.16e-06	2.89e-06	6.67e-06	2.88e-05	8.77e-06	1.65e-05	6.09e-07	3.99e-06	1.6e-06	3.98e-05	2.65e-06	3.88e-07	1.58e-06	1.15e-05	2.47e-06	1.01e-06	2.95e-06	1.8e-06	2.89e-05	1.98e-05	4.73e-05	3.58e-05	3.16e-06	1.59e-05	1.37e-06	2.22e-06	2.89e-05	2.68e-06	2.31e-05	2.31e-06	2.1e-05	8.7e-05	8.47e-07	1.05e-05	1.91e-05	4.32e-06	4.59e-07	6.6e-07	5.32e-07	5.99e-05	8.48e-07	3.4e-07	4.33e-06	3.44e-05	0.000116911
Height	2.43e-06	9.38e-06	1.5e-06	1.64e-05	3.59e-06	3.1e-06	7.43e-06	3.51e-05	1.03e-05	1.93e-05	6.86e-07	4.7e-06	1.79e-06	4.53e-05	3.1e-06	4.36e-07	1.9e-06	1.34e-05	2.85e-06	1.13e-06	3.46e-06	2.02e-06	3.34e-05	2.38e-05	5.52e-05	4.19e-05	3.48e-06	2.06e-05	1.6e-06	2.62e-06	3.34e-05	3.11e-06	2.68e-05	2.95e-06	2.34e-05	0.000101602	8.6e-07	1.25e-05	2.14e-05	5.32e-06	5.33e-07	7.56e-07	6.32e-07	6.95e-05	9.89e-07	3.88e-07	4.9e-06	4.13e-05	0.000136498
[truncated: 311 more columns]
