# Supplementary material for: Multi-Omics Analysis to Generate Hypotheses for Mild Health Problems in Monkeys
Source: Metabolites. 2021 Oct 13;11(10):701. doi: 10.3390/metabo11100701 (PMC8538200; doi:10.3390/metabo11100701)
Supplement: Supplementary file 1 [file metabolites-11-00701-s001.zip › Suppl_Table_S7_Fecal_Lipidomics.xlsx]

## Sheet: Feces-Lipids
Sample	BisMePA(15:0_15:0)	BisMePA(16:0_16:0)	BisMePA(16:1_18:2)	BisMePA(16:2e_15:0)	BisMePA(16:2e_16:0)	BisMePA(18:0_18:3)	BisMePA(18:1_18:2)	BisMePA(18:1_18:3)	BisMePA(18:3e_14:0)	BisMePA(18:3e_16:0)	BisMePA(18:3e_18:0)	BisMePA(18:3e_18:1)	BisMePA(18:3e_18:2)	Cer(d17:0_17:0)	Cer(d18:0_16:0)	Cer(d18:0_20:1)	Cer(d18:0_24:2)	Cer(d18:1_14:0)	Cer(d18:1_15:0)	Cer(d18:1_16:1)	Cer(d18:1_17:0)	Cer(d18:1_18:1+O)	Cer(d18:1_20:0+O)	Cer(d18:1_24:1)	Cer(d18:2_18:0+O)	Cer(d18:2_24:0+O)	Cer(d18:2_24:1)	Cer(d19:2_15:0)	Cer(m18:1_16:0+2O)	Cer(m18:1_16:0+O)	Cer(t18:0_15:0+O)	Cer(t18:0_17:0)	Cer(t18:0_18:1+O)	Cer(t18:0_24:1)	Cer(t18:0_24:2)	Cer(t18:1_22:0)	Cer(t18:1_22:0+O)	CerP(d17:0_16:0+O)	CerP(d17:0_16:1+O)	CerP(d17:0_18:1+O)	CerP(d18:0_16:0+O)	CerP(d18:0_16:1+O)	CerP(d18:0_17:0+O)	CerP(d18:1_16:0+O)	CerP(d18:1_17:0+O)	CerP(d18:1_18:0+2O)	CerP(d18:1_18:1+O)	CerP(d18:2_16:1)	CerP(d18:2_18:0+2O)
Monkey 1	5.04e-06	6.44e-06	0.000664551	0.000292045	8.4e-06	3.06e-05	4.27e-05	0.00021743	2.94e-05	2.96e-05	3.38e-05	4.83e-05	4.61e-06	4.8e-05	0.000637179	4.81e-05	2.33e-05	3.52e-05	9.33e-05	0.000159031	0.000175816	0.00026348	0.000936184	7.24e-05	0.000106969	5.93e-05	2.58e-05	7.99e-06	7.65e-05	1.8e-05	0.000571895	6.83e-05	0.00026348	7.24e-05	2.35e-05	2.8e-05	7.79e-05	1.97e-06	3.27e-05	0.000497109	3.31e-05	0.000133517	4.27e-05	1.1e-05	3.43e-06	0.000556502	8.11e-05	6.63e-06	9.71e-05
Monkey 2	3.31e-06	4.11e-06	0.000348163	0.000317851	7.2e-06	1.19e-05	3.27e-05	0.000166975	3.47e-05	5.66e-05	6.66e-05	0.00011511	3.38e-06	5.13e-05	0.000539946	4.57e-05	3.16e-06	3.2e-05	5.8e-05	0.000114709	0.00010945	0.000175421	0.000681385	8.5e-05	6.38e-05	5.55e-05	3.37e-05	1.3e-05	6.18e-05	1.58e-05	0.000374995	4.23e-05	0.000175421	8.5e-05	3.12e-05	2.26e-05	5.65e-05	2.22e-06	2.13e-05	0.000452424	2.52e-05	7.91e-05	2.78e-05	7.75e-06	2.49e-06	0.0004097	4.82e-05	4.2e-06	6.8e-05
Monkey 3	1.94e-06	2.9e-06	0.000185809	0.000344606	9.29e-06	6.97e-06	1.97e-05	0.000120055	2.98e-05	6.87e-05	9.12e-05	0.000164263	3.59e-06	5.55e-05	0.000471468	4.59e-05	4.72e-06	3.07e-05	3.11e-05	8.15e-05	5.93e-05	0.00011817	0.00051269	9.7e-05	3.13e-05	5.36e-05	3.98e-05	1.36e-05	4.15e-05	1.21e-05	0.000246467	2.6e-05	0.00011817	9.7e-05	3.67e-05	1.92e-05	4.39e-05	2.37e-06	1.47e-05	0.000396476	2.11e-05	5.02e-05	2.63e-05	6.08e-06	1.61e-06	0.000281207	2.48e-05	2.69e-06	3.21e-05
Monkey 4	9.28e-07	1.52e-06	9.88e-05	0.000357984	1.03e-05	5.66e-06	1.07e-05	7.16e-05	3.26e-05	8.6e-05	0.000108373	0.000186122	3.7e-06	5.76e-05	0.000411858	4.22e-05	5.66e-06	3.01e-05	1.14e-05	6.37e-05	2.08e-05	7.82e-05	0.000365781	0.000104183	1.29e-05	4.89e-05	4.34e-05	1.12e-05	2.69e-05	6.47e-06	0.000153275	1.05e-05	7.82e-05	0.000104183	4.08e-05	1.65e-05	3.24e-05	2.44e-06	6.06e-06	0.000385875	1.68e-05	2.99e-05	2.44e-05	1.64e-05	8.05e-07	0.00017559	2e-05	1.91e-06	1.19e-05
Monkey 5	5.78e-07	1.38e-06	9.91e-05	0.000317379	8.87e-06	6.01e-06	1.01e-05	6.2e-05	2.27e-05	9.17e-05	0.000101277	0.000173978	4.07e-06	5.39e-05	0.000370392	3.33e-05	5.61e-06	3.28e-05	1.19e-05	5.4e-05	1.5e-05	7.76e-05	0.00032575	0.000108161	1.18e-05	4.29e-05	4.24e-05	1.03e-05	1.9e-05	7.41e-06	0.000128188	8.52e-06	7.76e-05	0.000108161	4.01e-05	1.49e-05	3.67e-05	2.23e-06	5.52e-06	0.000395197	1.37e-05	2.54e-05	2.2e-05	1.61e-05	7.43e-07	0.000175862	1.99e-05	1.6e-06	1.6e-05
Monkey 6	4.55e-07	7.68e-07	9.94e-05	0.00026479	6.58e-06	5.48e-06	8.66e-06	6e-05	1.83e-05	8.13e-05	9.06e-05	0.000188878	3.8e-06	4.97e-05	0.000330988	2.33e-05	4.55e-06	3.5e-05	1.21e-05	4.25e-05	1.05e-05	7.45e-05	0.00027803	0.000109326	1.17e-05	3.39e-05	4.03e-05	7.76e-06	1.74e-05	7.43e-06	9.74e-05	5.96e-06	7.45e-05	0.000109326	3.86e-05	1.26e-05	3.74e-05	2.3e-06	3.82e-06	0.000380077	1.29e-05	1.92e-05	1.89e-05	1.79e-05	6.83e-07	0.000150931	1.86e-05	1.27e-06	1.97e-05
Monkey 7	1.68e-07	3.05e-07	0.00010307	0.000219692	4.81e-06	9.46e-06	7.72e-06	5.59e-05	1.08e-05	6.38e-05	8.46e-05	0.00015792	3.01e-06	4.8e-05	0.000257592	1.37e-05	4.33e-06	3.68e-05	1.19e-05	2.66e-05	4.19e-06	6.6e-05	0.000238321	0.000111921	9.71e-06	2.63e-05	4.11e-05	7.27e-06	1.06e-05	5.29e-06	6.37e-05	3.98e-06	6.6e-05	0.000111921	3.93e-05	1.07e-05	4.07e-05	2.32e-06	2.69e-06	0.00038228	1.02e-05	1.44e-05	1.88e-05	3.96e-06	7.22e-07	0.000131082	3.43e-05	7.9e-07	2.1e-05
Monkey 8	3.98e-07	4.14e-07	0.000122824	0.00020728	5.88e-06	8.82e-06	9.19e-06	7.29e-05	1.01e-05	4.08e-05	7.36e-05	0.000138102	2.46e-06	4.53e-05	0.000283148	1.33e-05	4.46e-06	3.61e-05	1.93e-05	3.58e-05	2.46e-05	8.32e-05	0.00028836	0.000117446	1.24e-05	3.5e-05	4.22e-05	1.09e-05	2.1e-05	3.54e-06	0.000105149	5.21e-06	8.32e-05	0.000117229	4.01e-05	1.36e-05	4.67e-05	2.46e-06	5.36e-06	0.000376833	1.5e-05	2.97e-05	2.68e-05	5.24e-06	9.05e-07	0.000151432	4.39e-05	1.53e-06	2.21e-05
Monkey 9	6.04e-07	5.08e-07	0.000131027	0.000211546	5.77e-06	1.2e-05	1.33e-05	8.86e-05	1.13e-05	3.09e-05	5.76e-05	5.51e-05	1.78e-06	4.75e-05	0.000319756	1.89e-05	7.55e-06	3.72e-05	3.53e-05	7.2e-05	6.73e-05	0.000128436	0.00039802	0.000139007	1.73e-05	5.56e-05	4.69e-05	2.05e-05	4.93e-05	1.08e-05	0.000189525	7.89e-06	0.000128436	0.000138706	4.37e-05	1.89e-05	6.1e-05	2.39e-06	1e-05	0.000418434	2.36e-05	6.44e-05	3.36e-05	1.83e-05	1.37e-06	0.000253168	6.73e-05	3.13e-06	3.82e-05
Monkey 10	7.98e-07	8.92e-07	0.000185779	0.000217051	5.9e-06	8.15e-06	2.1e-05	0.000140918	1.03e-05	9.9e-06	1.08e-05	2.22e-05	1.04e-06	4.36e-05	0.000330453	2.39e-05	1.04e-05	4.14e-05	7.85e-05	0.000144839	0.000176919	0.000238642	0.000685679	0.000180262	3.18e-05	9.7e-05	4.94e-05	3.37e-05	0.000126632	4.22e-05	0.000395087	1.39e-05	0.000238642	0.000179766	4.51e-05	3.29e-05	9.75e-05	2.87e-06	3.06e-05	0.000446685	3.83e-05	0.000126994	4.4e-05	9.04e-05	3.44e-06	0.000502244	0.000124057	7.7e-06	8.48e-05
Monkey 11	3.19e-07	4.58e-07	0.000172587	0.000241401	6.92e-06	1.14e-05	1.98e-05	0.000142984	1.79e-05	2.09e-05	8.61e-06	1.55e-05	9.97e-07	3.56e-05	0.000190365	2.35e-05	8.88e-06	3.96e-05	5.57e-05	0.000108185	0.000127715	0.000201922	0.000556739	0.000134443	2.6e-05	7.58e-05	3.94e-05	2.06e-05	0.000100201	4.21e-05	0.00032382	1.11e-05	0.000201922	0.000134443	3.63e-05	2.73e-05	8.52e-05	2.98e-06	2.3e-05	0.000403842	2.84e-05	8.27e-05	3e-05	7.88e-05	3.3e-06	0.000380294	8.94e-05	5.36e-06	6.92e-05
Monkey 12	2.15e-07	2.3e-07	0.00017853	0.00026051	9.12e-06	1.52e-05	1.89e-05	0.000159201	2.32e-05	2.75e-05	6.8e-06	9.13e-06	1.01e-06	2.48e-05	9.83e-05	1.65e-05	6.01e-06	3.61e-05	3.5e-05	6.62e-05	7.84e-05	0.00015017	0.000430013	9.15e-05	2.18e-05	5.91e-05	3.07e-05	1.84e-05	6.85e-05	3.01e-05	0.000255907	8.69e-06	0.00015017	9.15e-05	2.9e-05	2.31e-05	7.54e-05	2.86e-06	1.74e-05	0.0003519	1.71e-05	4.38e-05	2.86e-05	5.09e-05	2.87e-06	0.000248416	7.39e-05	3.17e-06	4.89e-05
Monkey 13	4.27e-07	1.69e-07	0.000165423	0.000266702	9.96e-06	1.38e-05	1.94e-05	0.00016329	2.72e-05	3.46e-05	7.29e-06	6.24e-06	1.61e-06	1.65e-05	9.05e-05	1.48e-05	4.04e-06	3.27e-05	1.29e-05	3.11e-05	3.28e-05	0.00011391	0.000297206	5.31e-05	1.94e-05	5.32e-05	2.48e-05	1.66e-05	3.06e-05	1.11e-05	0.000199218	8.08e-06	0.00011391	5.31e-05	2.36e-05	2.03e-05	6.36e-05	2.33e-06	5.26e-06	0.000285787	1.3e-05	2.38e-05	3.09e-05	7.01e-06	1.54e-06	0.000147337	2.63e-05	9.3e-07	2.51e-05
Monkey 14	6.48e-07	1.04e-07	0.000139517	0.000335445	1.6e-05	1.19e-05	2.18e-05	0.000136984	2.71e-05	6.62e-05	4.22e-05	0.00011697	3.35e-06	3.55e-05	0.000150934	1.55e-05	5.06e-06	3.86e-05	1.24e-05	5.12e-05	2.39e-05	9.98e-05	0.000313165	7.05e-05	2.03e-05	6.58e-05	3.91e-05	2.38e-05	3.22e-05	1.1e-05	0.000159522	8.59e-06	9.98e-05	7.05e-05	3.6e-05	2.54e-05	6.61e-05	2.68e-06	4.76e-06	0.000466561	1.71e-05	2.35e-05	3.37e-05	6.1e-06	1.43e-06	0.000165271	2.93e-05	8.12e-07	2.23e-05
Monkey 15	6.5e-07	3.18e-07	0.000109707	0.000403387	1.58e-05	1.14e-05	1.85e-05	9.88e-05	3.14e-05	6.39e-05	6.33e-05	0.000189885	5.07e-06	4.77e-05	0.000197285	1.59e-05	5.48e-06	4.27e-05	1.16e-05	6.09e-05	1.7e-05	8.78e-05	0.000322182	8.43e-05	1.92e-05	6.87e-05	4.62e-05	2.32e-05	3.46e-05	1.54e-05	0.000132323	8.59e-06	8.78e-05	8.43e-05	4.36e-05	2.86e-05	6.47e-05	3.29e-06	5.01e-06	0.000586214	2.28e-05	2.2e-05	4.01e-05	5.31e-06	1.19e-06	0.000175791	3.49e-05	8.88e-07	1.55e-05
Monkey 16	5.83e-07	3.43e-07	0.000100407	0.000451925	1.63e-05	9.83e-06	1.43e-05	7.78e-05	3.51e-05	6.98e-05	7.47e-05	0.000193014	6.35e-06	5.55e-05	0.000219601	1.33e-05	5.63e-06	4.62e-05	1.11e-05	6.99e-05	1.2e-05	7.34e-05	0.000318459	9.5e-05	1.99e-05	7.27e-05	5.36e-05	2.08e-05	3.73e-05	1.34e-05	0.000105411	9.58e-06	7.34e-05	9.5e-05	5.11e-05	3.04e-05	6.03e-05	3.69e-06	4.23e-06	0.000707494	2.77e-05	2.03e-05	4.51e-05	9.2e-06	1.15e-06	0.000149882	2.99e-05	9.03e-07	1.63e-05
Monkey 17	7.34e-07	6.56e-07	9.62e-05	0.000335285	1.02e-05	8.17e-06	1.04e-05	7.48e-05	2.9e-05	4.65e-05	5.77e-05	0.000150697	5.72e-06	7.14e-05	0.000240591	9.65e-06	4.74e-06	3.81e-05	9.36e-06	6.61e-05	1.36e-05	7.76e-05	0.000270927	0.000105783	1.81e-05	5.97e-05	4.51e-05	1.39e-05	3.32e-05	1.16e-05	0.000108696	7.84e-06	7.76e-05	0.000105783	4.32e-05	2.49e-05	5.36e-05	3.18e-06	5.16e-06	0.00050551	2.68e-05	2.75e-05	4.25e-05	9.45e-06	1.7e-06	0.000200746	4.1e-05	1.95e-06	1.39e-05
Monkey 18	9.01e-07	7.13e-07	9.52e-05	0.000217265	7.02e-06	7.21e-06	1.01e-05	7.05e-05	2.17e-05	5.99e-05	4.6e-05	9.45e-05	4.75e-06	8.86e-05	0.000253815	1.11e-05	4.54e-06	3.18e-05	7.7e-06	7.12e-05	1.52e-05	7.84e-05	0.000234401	0.000116628	1.67e-05	4.76e-05	4.19e-05	1.2e-05	2.87e-05	7.39e-06	0.000114568	6.64e-06	7.84e-05	0.000116628	4.02e-05	1.94e-05	4.96e-05	2.36e-06	5.42e-06	0.000327754	2.5e-05	3.13e-05	3.67e-05	9.68e-06	2.36e-06	0.00026899	5.06e-05	3.12e-06	1.26e-05
Monkey 19	9.69e-07	9.01e-07	8.95e-05	9.83e-05	3.27e-06	6.95e-06	1.06e-05	6.74e-05	1.43e-05	6.43e-05	3.55e-05	9.8e-05	3.28e-06	0.000113993	0.000269709	1.29e-05	3.96e-06	2.36e-05	5.81e-06	7.07e-05	1.57e-05	8.78e-05	0.000206728	0.000129147	1.24e-05	3.3e-05	3.59e-05	1.2e-05	1.98e-05	6.56e-06	0.000117761	3.44e-06	8.78e-05	0.000129147	3.34e-05	1.32e-05	5.1e-05	1.67e-06	6.87e-06	0.000134562	2.37e-05	3.35e-05	3.03e-05	3.03e-06	2.75e-06	0.000335721	7.46e-05	3.56e-06	7.47e-06
Monkey 20	3.65e-06	4.15e-06	8.74e-05	0.000104912	3.95e-06	5.56e-06	9.75e-06	6.05e-05	1.21e-05	5.91e-05	2.69e-05	6.11e-05	2.56e-06	9.42e-05	0.000268949	1.74e-05	4.92e-06	3.3e-05	7.82e-06	0.000110722	1.59e-05	9.2e-05	0.000244135	0.000150987	1.48e-05	4.23e-05	4.12e-05	2.87e-05	2.86e-05	4.18e-06	0.000166218	5.98e-06	9.2e-05	0.00015123	3.78e-05	1.66e-05	5.15e-05	2e-06	7.86e-06	0.000154047	2.15e-05	3.1e-05	2.91e-05	3.07e-06	2.29e-06	0.000310192	7.57e-05	4.78e-06	7.71e-06
Pearson Correlation with Stool Water	-0.138687	-0.0430713	-0.344375	-0.253475	-0.478867	-0.486159	-0.428748	-0.400196	-0.362818	0.106294	0.231386	0.127275	-0.221347	0.104676	-0.0070044	-0.0195477	-0.421333	-0.0898916	-0.142226	-0.135261	-0.153964	-0.210588	-0.199207	0.410639	-0.338314	-0.327603	0.18753	-0.106855	-0.089386	0.00206927	-0.244974	-0.281344	-0.210588	0.4121	0.199136	-0.420524	-0.311775	-0.0544161	-0.0905608	-0.24869	-0.28218	-0.189014	-0.542645	0.135292	-0.135959	-0.131829	-0.00037304	-0.0100223	-0.128965
ｔ	-0.594142	-0.182906	-1.55625	-1.11171	-2.31426	-2.3603	-2.01348	-1.85272	-1.65186	0.453537	1.00907	0.544408	-0.962984	0.446557	-0.0297179	-0.0829496	-1.97106	-0.382928	-0.609612	-0.579188	-0.661097	-0.913943	-0.862451	1.91072	-1.52528	-1.47108	0.809993	-0.455956	-0.380757	0.0087792	-1.072	-1.24389	-0.913943	1.91891	0.86213	-1.96646	-1.39214	-0.23121	-0.385802	-1.08932	-1.2479	-0.816638	-2.74089	0.579321	-0.582229	-0.564227	-0.00158267	-0.0425231	-0.551759
p	0.559811	0.856916	0.137055	0.280891	0.0326705	0.0297489	0.0592633	0.0803916	0.1159	0.655582	0.326312	0.592841	0.348315	0.660521	0.976619	0.934807	0.0642916	0.706258	0.549737	0.56964	0.516923	0.372827	0.399785	0.0721013	0.144567	0.158535	0.428523	0.653875	0.70784	0.993092	0.297883	0.229498	0.372827	0.0709944	0.399956	0.0648595	0.180843	0.819759	0.704165	0.290381	0.228058	0.424812	0.0134307	0.569553	0.567634	0.579563	0.998755	0.96655	0.587899
Spearman Correlation with Stool Water	-0.231579	0.18797	-0.0556391	-0.246617	-0.4	-0.287434	-0.390372	-0.318797	-0.312782	-0.043609	0.192481	0.0285714	-0.245113	0.119639	0.159398	0.160963	-0.13985	-0.08349	0.0549079	0.0165414	-0.121805	-0.117382	-0.00601504	0.395489	-0.233923	-0.312782	0.0451128	-0.172245	-0.138346	-0.121805	-0.0736842	-0.142911	-0.117382	0.395489	0.0112824	-0.380451	-0.32782	-0.135338	0.123308	-0.237594	-0.246709	0.037594	-0.607519	0.00902256	-0.0947368	0.0857143	0.0315789	0.147368	0.0165414
ｔ	-1.00996	0.811962	-0.236423	-1.07965	-1.85164	-1.27321	-1.79894	-1.427	-1.39712	-0.185194	0.83219	0.121268	-1.07265	0.511257	0.685029	0.69193	-0.59922	-0.355459	0.233306	0.0701886	-0.520649	-0.501474	-0.0255201	1.82686	-1.02077	-1.39712	0.191592	-0.741862	-0.592651	-0.520649	-0.313468	-0.612608	-0.501474	1.82686	0.0478704	-1.74537	-1.47217	-0.579524	0.527176	-1.03774	-1.08008	0.159611	-3.24495	0.038281	-0.40375	0.364998	0.134045	0.632133	0.0701886
p	0.325899	0.427421	0.815774	0.294552	0.0805539	0.219142	0.0888171	0.170698	0.179364	0.855148	0.416206	0.904822	0.297601	0.615385	0.502052	0.497811	0.556494	0.726377	0.818156	0.944817	0.608957	0.622115	0.979921	0.0843516	0.320888	0.179364	0.850206	0.467741	0.560787	0.608957	0.757529	0.547798	0.622115	0.0843516	0.962347	0.097968	0.158244	0.569419	0.604509	0.313131	0.294365	0.874965	0.0044951	0.969885	0.691153	0.719366	0.894854	0.535247	0.944817
[truncated: 795 more columns]
