# Supplementary material for: Multi-Omics Analysis to Generate Hypotheses for Mild Health Problems in Monkeys
Source: Metabolites. 2021 Oct 13;11(10):701. doi: 10.3390/metabo11100701 (PMC8538200; doi:10.3390/metabo11100701)
Supplement: Supplementary file 1 [file metabolites-11-00701-s001.zip › Suppl_Table_S8_Plasma-Lipidomics.xlsx]

## Sheet: Plasma-Lipids
Sample	AcCa(10:0)	AcCa(10:1)	AcCa(12:0)	AcCa(12:1)	AcCa(14:1)	AcCa(16:0)	AcCa(18:0)	AcCa(18:1)	AcCa(18:2)	AcCa(6:0)	AcCa(8:0)	Cer(d18:0_16:0)	Cer(d18:0_18:0)	Cer(d18:0_22:0)	Cer(d18:0_23:0)	Cer(d18:0_24:0)	Cer(d18:0_24:1)	Cer(d18:1_16:0)	Cer(d18:1_16:1)	Cer(d18:1_18:0)	Cer(d18:1_20:0)	Cer(d18:1_22:0)	Cer(d18:1_22:1)	Cer(d18:1_23:0)	Cer(d18:1_23:1)	Cer(d18:1_24:0)	Cer(d18:1_24:1)	Cer(d18:1_24:2)	Cer(d18:1_25:0)	Cer(d18:2_16:0)	Cer(d18:2_23:0)	Cer(d18:2_24:0)	Cer(d19:2_15:1)	Cer(m17:1_17:1)	Cer(m18:1_16:0)	Cer(m18:1_24:0+O)	Cer(t18:0_16:0)	Cer(t18:0_16:0+O)	Cer(t18:0_18:0)	Cer(t18:0_20:0)	Cer(t18:0_22:0)	Cer(t18:0_23:0)	Cer(t18:0_24:0)	Cer(t18:0_24:1)	Cer(t18:0_24:2)	Cer(t18:1_23:0)	ChE(18:1)	ChE(18:2)	ChE(20:4)
Monkey 1	1.41e-06	5.22e-07	5.98e-07	5.88e-07	5.52e-07	4.43e-06	1.83e-06	2.96e-06	3.92e-06	1.57e-06	6.91e-07	1.92e-06	4.94e-07	2.76e-06	1.22e-06	8.92e-05	2.73e-06	0.000120284	6.33e-07	5.34e-05	4.02e-05	0.00027535	8.17e-07	0.000282999	7.86e-07	0.000739842	0.00043988	0.00010581	2.41e-05	1.84e-06	1.34e-05	2.95e-05	1.94e-06	1.5e-05	9.93e-07	2.74e-06	4.72e-06	4.8e-06	1.88e-06	1.13e-06	8.14e-06	8.58e-06	2.61e-05	1.63e-05	4.79e-06	3.47e-07	4.05e-06	6.09e-05	1.9e-05
Monkey 2	9.01e-06	4.66e-06	5.34e-06	4.6e-06	5.58e-06	7.26e-06	4.35e-06	9.4e-06	8.65e-06	3.53e-06	3.9e-06	6.46e-07	4.76e-07	8.95e-07	1.06e-06	5.08e-05	1.2e-06	0.000203361	3.53e-07	0.000115989	5.88e-05	0.000374344	2.34e-07	0.000543184	3.31e-07	0.000931583	0.000796655	0.000190937	7.36e-05	8.61e-07	3.57e-05	5.37e-05	8.45e-07	6.94e-06	6.08e-07	1.2e-06	2.66e-06	1.75e-06	1.49e-06	7.25e-07	5.29e-06	7.8e-06	1.3e-05	1.18e-05	3.02e-06	6.89e-07	2.41e-06	3.46e-05	1.1e-05
Monkey 3	4.84e-06	3.36e-06	1.53e-06	1.81e-06	1.85e-06	2.98e-06	1.61e-06	3.48e-06	4.67e-06	1.47e-06	2.35e-06	5.19e-07	1.77e-07	5.21e-07	7.39e-07	4.16e-05	9.16e-07	0.000169795	5.17e-07	8.24e-05	4.8e-05	0.000203552	2.76e-07	0.000276526	3.27e-07	0.000534014	0.000575565	0.000164635	3.41e-05	7.54e-07	2.24e-05	4.17e-05	8.67e-07	6.83e-06	4.85e-07	9.15e-07	2.44e-06	2.82e-06	1.12e-06	6e-07	2.94e-06	4.21e-06	8.48e-06	8.4e-06	3.28e-06	2.92e-07	3.42e-06	4.33e-05	1.21e-05
Monkey 4	5.59e-06	3.54e-06	2.89e-06	2.02e-06	2.1e-06	5.26e-06	1.66e-06	3.25e-06	6.24e-06	4.23e-06	2.98e-06	8.24e-07	1.96e-07	8.32e-07	7.97e-07	4.51e-05	7.79e-07	8.34e-05	3.94e-07	3.88e-05	2.49e-05	0.000158275	1.94e-07	0.000193871	2.77e-07	0.00045022	0.000273835	8.45e-05	2.4e-05	1.28e-06	1.66e-05	2.69e-05	1.08e-06	9.01e-06	6.49e-07	7.79e-07	1.78e-06	3.87e-06	6.7e-07	4.56e-07	2.03e-06	3.8e-06	8.39e-06	4.43e-06	1.43e-06	2.54e-07	7.1e-06	6.91e-05	1.75e-05
Monkey 5	5.45e-06	4.25e-06	2.69e-06	2.62e-06	2.58e-06	5.32e-06	1.39e-06	3.17e-06	6.69e-06	3.82e-06	3.15e-06	4.46e-07	1.34e-07	5.96e-07	5.08e-07	3.49e-05	7.22e-07	0.000100607	5.47e-07	3.01e-05	3.09e-05	0.000166394	2.66e-07	0.000267725	3.13e-07	0.000564011	0.000318505	9.2e-05	4.59e-05	1.74e-06	3e-05	5.54e-05	1.84e-06	1.27e-05	9.7e-07	7.21e-07	1.77e-06	3.36e-06	3.9e-07	3.28e-07	2.47e-06	4.1e-06	8.74e-06	5.51e-06	1.61e-06	5.02e-07	1.37e-06	5.19e-05	1.96e-05
Monkey 6	8.26e-06	3.58e-06	3.34e-06	4.62e-06	3.82e-06	6.01e-06	2.06e-06	4.58e-06	4.15e-06	2.89e-06	3.65e-06	3.44e-07	1.24e-07	3.82e-07	5.2e-07	2.73e-05	5.59e-07	9.56e-05	4.5e-07	2.93e-05	1.69e-05	0.000261799	4.64e-07	0.000382679	6.59e-07	0.000703796	0.000416012	9.28e-05	3.79e-05	1.49e-06	2.97e-05	4.15e-05	1.21e-06	1.66e-05	8.37e-07	5.6e-07	1.51e-06	2.7e-06	5.46e-07	2.57e-07	3.73e-06	6.88e-06	1.24e-05	6.49e-06	2.33e-06	4.11e-07	1.91e-06	4.03e-05	8.97e-06
Monkey 7	1.92e-06	1.57e-06	6.93e-07	8.69e-07	8.34e-07	2.55e-06	9.43e-07	1.79e-06	4e-06	2.06e-06	1.01e-06	9.81e-07	2.67e-07	1.19e-06	6.68e-07	5.52e-05	1.42e-06	0.000128013	3.54e-07	3.98e-05	3.57e-05	0.000194694	9.55e-08	0.000249345	1.16e-07	0.000551148	0.000355637	0.0001022	4.02e-05	8.55e-07	1.3e-05	3.42e-05	7.55e-07	6.59e-06	7.19e-07	1.42e-06	1.9e-06	2.41e-06	5.82e-07	3.93e-07	2.63e-06	3.72e-06	8.36e-06	5.86e-06	1.42e-06	2.1e-07	2.96e-06	4.22e-05	9.5e-06
Monkey 8	7.25e-06	4.7e-06	3.24e-06	3.49e-06	3.32e-06	5.76e-06	1.76e-06	3.82e-06	7.98e-06	2.79e-06	3.96e-06	7.65e-07	2.06e-07	7.77e-07	8.05e-07	4.06e-05	9.61e-07	0.000147456	3.88e-07	5.09e-05	3.06e-05	0.000191311	1.91e-07	0.000270355	2.38e-07	0.00059978	0.000421442	0.000118218	2.44e-05	1.05e-06	2.14e-05	4.79e-05	7.3e-07	6.56e-06	4.92e-07	9.6e-07	2.19e-06	3.31e-06	6.43e-07	4.08e-07	2.83e-06	3.8e-06	8.5e-06	5.67e-06	1.8e-06	3.05e-07	2.03e-06	3.31e-05	1.22e-05
Monkey 9	2.56e-06	2.29e-06	8.77e-07	8.47e-07	1.02e-06	3.35e-06	1.16e-06	2.32e-06	4.94e-06	1.47e-06	1.42e-06	1.03e-06	2.12e-07	1.14e-06	9.51e-07	8.71e-05	1.37e-06	0.00013336	3.1e-07	4.24e-05	2.71e-05	0.000203562	9.19e-08	0.000267916	1.82e-07	0.000600589	0.000346755	0.000106955	2.79e-05	1.67e-06	1.42e-05	3.72e-05	1.34e-06	1.16e-05	7.63e-07	1.37e-06	2.02e-06	4.04e-06	5.68e-07	3.49e-07	2.09e-06	3.68e-06	8.9e-06	4.9e-06	1.38e-06	3.04e-07	1.16e-06	3.21e-05	1.26e-05
Monkey 10	4.84e-06	2.89e-06	1.87e-06	2.34e-06	2.09e-06	4.16e-06	1.27e-06	3.25e-06	5.3e-06	2.07e-06	2.28e-06	1.06e-06	4.03e-07	1.36e-06	1.49e-06	8.45e-05	1.28e-06	0.00013709	3.89e-07	5.93e-05	4.25e-05	0.000233703	2.05e-07	0.000352001	2.64e-07	0.000688638	0.000339367	7.95e-05	3.94e-05	1.25e-06	2.64e-05	4.05e-05	1.3e-06	1.17e-05	1.02e-06	1.27e-06	2.31e-06	3.35e-06	8.35e-07	4.74e-07	3.5e-06	6.19e-06	1.11e-05	5.41e-06	1.47e-06	3.59e-07	3.08e-06	4.78e-05	1.01e-05
Monkey 11	7.94e-06	5.01e-06	2.98e-06	4.27e-06	4.02e-06	7.12e-06	2.81e-06	6.9e-06	9.04e-06	4.46e-06	4.27e-06	9.18e-07	4.66e-07	1.1e-06	1.86e-06	7.04e-05	1.44e-06	0.000187792	2.23e-07	0.000123196	6.17e-05	0.00032858	6.88e-08	0.000452813	1.1e-07	0.000669005	0.000649169	0.000137307	3.62e-05	1.39e-06	4.11e-05	6e-05	1.48e-06	1.29e-05	1e-06	1.44e-06	3.23e-06	2.42e-06	1.88e-06	9.09e-07	4.9e-06	7.17e-06	1.19e-05	1.12e-05	2.41e-06	6.69e-07	4.65e-06	5.52e-05	1.04e-05
Monkey 12	1.18e-05	7.12e-06	3.92e-06	5.62e-06	4.62e-06	8.23e-06	2.99e-06	7e-06	9.81e-06	4.14e-06	5.84e-06	5.24e-07	2.61e-07	8.06e-07	8.21e-07	4.45e-05	1.31e-06	0.000205117	7.25e-07	9.66e-05	6.59e-05	0.000364922	4.64e-07	0.000643831	8.21e-07	0.000837919	0.000782427	0.000228038	5.99e-05	1.88e-06	9.23e-05	0.000103754	1.85e-06	1.94e-05	1.68e-06	1.31e-06	3.37e-06	3.3e-06	1.07e-06	8.51e-07	5.02e-06	8.96e-06	1.28e-05	1.3e-05	4.46e-06	1.29e-06	1.2e-06	3.58e-05	1.52e-05
Monkey 13	1.68e-06	1.75e-06	3.93e-07	4.62e-07	4.39e-07	1.72e-06	5.76e-07	8.73e-07	2.36e-06	7.89e-07	1.06e-06	5.03e-07	1.69e-07	9.68e-07	1.36e-06	6.93e-05	1.03e-06	7.28e-05	3.9e-07	2.72e-05	2.9e-05	0.000177119	3.05e-07	0.000366947	3.63e-07	0.000731761	0.000341397	8.18e-05	4.23e-05	2.34e-06	2.82e-05	5.65e-05	2.07e-06	1.89e-05	1.37e-06	1.04e-06	1.4e-06	2.48e-06	4.27e-07	4.15e-07	2.77e-06	6.23e-06	1.29e-05	5.8e-06	1.86e-06	4.93e-07	1.66e-06	3.68e-05	1.12e-05
Monkey 14	1.38e-05	8.37e-06	6.62e-06	7.07e-06	7.1e-06	1.26e-05	5.03e-06	9.16e-06	1.12e-05	4.57e-06	6.69e-06	1.12e-06	8.12e-07	2e-06	2.44e-06	7.22e-05	2.41e-06	0.000190028	8.97e-07	8.58e-05	5.43e-05	0.000385368	7.82e-07	0.000728917	1.29e-06	0.000938566	0.000920983	0.000266715	5.77e-05	3.93e-06	8.09e-05	9.14e-05	3.01e-06	3.11e-05	1.91e-06	2.41e-06	5.26e-06	4.89e-06	2.04e-06	1.29e-06	9.35e-06	1.74e-05	2.52e-05	2.48e-05	8.33e-06	1.64e-06	4.06e-06	8.64e-05	3.86e-05
Monkey 15	1.15e-05	7.72e-06	3.74e-06	5.41e-06	4.15e-06	9.72e-06	2.71e-06	8.85e-06	1.28e-05	5.57e-06	6.84e-06	9.32e-07	3.23e-07	1.69e-06	1.84e-06	5.26e-05	1.94e-06	0.000144293	1e-06	3.64e-05	2.85e-05	0.000196015	5.86e-07	0.00039466	8.7e-07	0.000646219	0.000444385	0.000134414	5.09e-05	3.51e-06	3.56e-05	4.37e-05	4.45e-06	4.25e-05	2.51e-06	1.94e-06	3.93e-06	9.68e-06	8.88e-07	7.22e-07	4.89e-06	9.13e-06	1.64e-05	1.08e-05	3.85e-06	8.32e-07	3.02e-06	5.31e-05	3.36e-05
Monkey 16	4.78e-06	2.91e-06	1.71e-06	1.46e-06	1.53e-06	3.35e-06	1.79e-06	2.28e-06	3.24e-06	1.62e-06	2.24e-06	8.39e-07	2.92e-07	9.62e-07	1.08e-06	5.41e-05	9.32e-07	0.000125654	5.42e-07	5.31e-05	3.58e-05	0.000223414	2.16e-07	0.000354574	3.97e-07	0.000767345	0.000382341	8.49e-05	5.6e-05	1.3e-06	3.06e-05	5.34e-05	1.83e-06	1.42e-05	1.01e-06	9.32e-07	2.18e-06	3.61e-06	7.35e-07	4.68e-07	2.7e-06	5.56e-06	1.16e-05	6.28e-06	1.55e-06	3.87e-07	1.6e-06	3.6e-05	1.08e-05
Monkey 17	1.42e-05	6.76e-06	5.55e-06	8.62e-06	5.72e-06	5.72e-06	1.69e-06	4.77e-06	6.24e-06	2.86e-06	5.69e-06	7.02e-07	3.26e-07	7.74e-07	8.44e-07	4.17e-05	1.32e-06	0.000171513	5.13e-07	0.000101666	7.25e-05	0.000285931	1.83e-07	0.000487676	3.07e-07	0.000697203	0.000689707	0.000139908	6.5e-05	1.36e-06	4.46e-05	6.41e-05	1.22e-06	1.22e-05	1.12e-06	1.31e-06	2.86e-06	3.15e-06	1.58e-06	9.81e-07	4.17e-06	6.69e-06	1.01e-05	1.02e-05	2.67e-06	7.12e-07	8.28e-07	2.27e-05	1e-05
Monkey 18	6.98e-06	3.1e-06	2.79e-06	2.88e-06	2.99e-06	3.52e-06	1.91e-06	3.36e-06	3.84e-06	2.26e-06	3.05e-06	4.8e-07	2.57e-07	6.48e-07	7.38e-07	4.98e-05	8.21e-07	0.000264858	7.83e-07	0.000166646	8.62e-05	0.000432183	2.15e-07	0.00056002	3.46e-07	0.000875804	0.000879637	0.000223029	6.98e-05	2.01e-06	7.38e-05	9.55e-05	2.14e-06	1.7e-05	2.33e-06	8.21e-07	3.48e-06	3.85e-06	1.9e-06	9.12e-07	4.95e-06	7.07e-06	1.2e-05	1.18e-05	3.18e-06	7.09e-07	9.6e-07	2.89e-05	1.18e-05
Monkey 19	6.1e-06	4.19e-06	2.8e-06	2.95e-06	2.15e-06	6.48e-06	2.33e-06	4.91e-06	7.94e-06	2.38e-06	3.48e-06	1.01e-06	2.29e-07	1.18e-06	1.75e-06	6.97e-05	1.08e-06	0.00011874	1.07e-06	5.7e-05	4.79e-05	0.000207224	5.59e-07	0.000369165	7.34e-07	0.000762939	0.000423157	0.000120751	8.12e-05	5.12e-06	3.27e-05	5.88e-05	5.18e-06	5.85e-05	4.53e-06	1.08e-06	3.61e-06	8.59e-06	1.15e-06	8.68e-07	4.08e-06	8.4e-06	1.8e-05	1.06e-05	3.05e-06	6.93e-07	1.91e-06	6.01e-05	2.17e-05
Monkey 20	6.39e-06	3.27e-06	3.27e-06	2.64e-06	2.74e-06	4.65e-06	2.28e-06	4.36e-06	4.91e-06	1.88e-06	2.86e-06	6.74e-07	4.36e-07	8.94e-07	8.83e-07	5.62e-05	8.15e-07	0.000132777	5.86e-07	6.47e-05	3.07e-05	0.000201039	2.39e-07	0.000283357	3.52e-07	0.00058588	0.00035578	9.85e-05	2.8e-05	2.11e-06	2.45e-05	4.15e-05	2.32e-06	2.43e-05	2.54e-06	8.16e-07	1.94e-06	4.01e-06	8.58e-07	3.35e-07	2.22e-06	3.97e-06	7.63e-06	4.29e-06	1.38e-06	3.81e-07	1.21e-06	3.05e-05	5.93e-06
Pearson Correlation with Stool Water	0.069257	0.0441859	0.0570277	0.0971412	0.0888875	-0.18153	-0.145952	0.00396609	0.00246466	0.0700553	0.0303433	-0.548824	-0.358958	-0.645556	-0.589944	-0.552582	-0.536612	0.151298	-0.375165	0.113965	0.0600353	-0.105709	-0.611787	-0.170437	-0.552323	-0.35923	-0.0501054	-0.0732789	-0.0314642	-0.502163	-0.0841315	-0.0499352	-0.42549	-0.371546	-0.230798	-0.538942	-0.518789	-0.413233	-0.320178	-0.46146	-0.526479	-0.551673	-0.746253	-0.485499	-0.492707	-0.247956	-0.308574	-0.529768	-0.542042
ｔ	0.29454	0.187648	0.242342	0.414094	0.378616	-0.783181	-0.625925	0.0168268	0.0104567	0.297951	0.128795	-2.78545	-1.63168	-3.58625	-3.0998	-2.81286	-2.698	0.649379	-1.71711	0.486682	0.255168	-0.45101	-3.28131	-0.733839	-2.81097	-1.63309	-0.212846	-0.311734	-0.133557	-2.46365	-0.35821	-0.212122	-1.99478	-1.69788	-1.00636	-2.7145	-2.57461	-1.92527	-1.43388	-2.20682	-2.62725	-2.80621	-4.75629	-2.35611	-2.40219	-1.0859	-1.37633	-2.65005	-2.73658
p	0.771715	0.853251	0.811255	0.683698	0.709401	0.443704	0.539221	0.98676	0.991772	0.769152	0.898948	0.0122113	0.120119	0.0021108	0.00618199	0.0115147	0.014714	0.524294	0.103115	0.632357	0.801486	0.657368	0.00414889	0.472498	0.0115617	0.119819	0.833839	0.758824	0.895234	0.0240548	0.724353	0.834395	0.0614346	0.106751	0.327579	0.014207	0.0190904	0.070145	0.16875	0.0405531	0.0170901	0.0116802	0.000157766	0.0300043	0.0273037	0.291853	0.1856	0.0162873	0.0135546
Spearman Correlation with Stool Water	0.163219	0.130827	0.156391	0.168421	0.196992	0.00376081	-0.0721805	0.117337	0.163219	0.0917638	0.106767	-0.427068	-0.115789	-0.467669	-0.557895	-0.46015	-0.237594	0.245113	-0.33985	0.166917	0.145865	-0.112782	-0.403159	-0.17594	-0.473684	-0.433083	-0.0451128	0.109774	-0.00451128	-0.458647	-0.043609	-0.00376081	-0.46015	-0.418045	-0.305263	-0.234675	-0.321805	-0.554887	-0.224144	-0.401504	-0.231579	-0.367055	-0.598496	-0.240692	-0.315156	-0.150376	-0.245205	-0.393985	-0.457143
ｔ	0.701893	0.559864	0.671777	0.724905	0.852473	0.0159559	-0.307037	0.501283	0.701893	0.390971	0.455578	-2.00382	-0.49458	-2.24476	-2.85205	-2.19888	-1.03774	1.07265	-1.53311	0.718246	0.625542	-0.481566	-1.86909	-0.758278	-2.28192	-2.0385	-0.191592	0.468565	-0.0191399	-2.18977	-0.185194	-0.0159559	-2.19888	-1.9524	-1.36004	-1.02424	-1.44201	-2.8298	-0.975792	-1.85994	-1.00996	-1.67414	-3.16955	-1.0521	-1.40889	-0.645329	-1.07308	-1.81863	-2.18069
p	0.491723	0.582473	0.510257	0.477829	0.405152	0.987445	0.762339	0.622247	0.491723	0.700408	0.654142	0.060376	0.626879	0.0375885	0.010585	0.0412007	0.313131	0.297601	0.142637	0.481825	0.539466	0.635917	0.0779709	0.458099	0.03488	0.0564656	0.850206	0.645005	0.98494	0.0419543	0.855148	0.987445	0.0412007	0.0666216	0.190609	0.319289	0.166474	0.0111035	0.3421	0.0793166	0.325899	0.11139	0.00530584	0.306674	0.175908	0.526855	0.297413	0.0856465	0.0427185
[truncated: 662 more columns]
