# Supplementary material for: Multi-Omics Analysis to Generate Hypotheses for Mild Health Problems in Monkeys
Source: Metabolites. 2021 Oct 13;11(10):701. doi: 10.3390/metabo11100701 (PMC8538200; doi:10.3390/metabo11100701)
Supplement: Supplementary file 1 [file metabolites-11-00701-s001.zip › Suppl_Table_S9_Urinary-Lipidomics.xlsx]

## Sheet: Urine-Lipids
Sample	AcCa(10:0)	AcCa(10:1)	AcCa(10:2)	AcCa(10:3)	AcCa(11:0)	AcCa(11:1)	AcCa(12:0)	AcCa(12:1)	AcCa(12:3)	AcCa(13:0)	AcCa(14:1)	AcCa(14:2)	AcCa(8:0)	AcCa(9:0)	Cer(d16:0_26:0)	Cer(d16:1_16:1)	Cer(d17:0_16:0)	Cer(d17:0_16:0+O)	Cer(d17:0_26:0)	Cer(d17:1_16:0)	Cer(d17:1_16:0+O)	Cer(d17:1_16:1)	Cer(d17:1_24:0)	Cer(d17:1_24:1)	Cer(d18:0_14:0)	Cer(d18:0_15:0)	Cer(d18:0_16:0)	Cer(d18:0_16:0+O)	Cer(d18:0_17:0+O)	Cer(d18:0_18:0)	Cer(d18:0_22:0)	Cer(d18:0_23:0)	Cer(d18:0_24:0)	Cer(d18:0_24:0+O)	Cer(d18:0_26:0)	Cer(d18:1_15:0)	Cer(d18:1_16:0)	Cer(d18:1_16:0+O)	Cer(d18:1_16:1)	Cer(d18:1_17:1)	Cer(d18:1_18:0)	Cer(d18:1_18:1)	Cer(d18:1_20:0+O)	Cer(d18:1_20:1)	Cer(d18:1_22:0)	Cer(d18:1_22:0+O)	Cer(d18:1_22:1)	Cer(d18:1_23:1)	Cer(d18:1_24:0)
Monkey 1	0.000432242	0.0047327	0.000844981	0.00104106	0.000151476	0.000441051	7.1e-05	0.00179925	1.9e-05	4.19e-05	1.69e-05	0.000146553	0.000104687	0.00196612	9.32e-06	1.07e-05	6.25e-06	9.7e-06	2.69e-05	7.97e-06	7.69e-06	3.1e-05	2.22e-05	8.04e-06	6.44e-06	4.87e-06	0.000576867	3.6e-05	8.3e-06	1.35e-05	0.00102051	0.00358406	0.00194732	1.11e-05	0.00140197	0.00131313	0.00153925	2.65e-05	9.77e-05	5.25e-06	2.35e-05	1.79e-05	1.06e-05	1.19e-05	4.17e-05	1.35e-05	7.05e-05	4.13e-05	0.00333641
Monkey 2	0.000376261	0.00758974	0.00140014	0.000967847	9.68e-05	0.00043251	0.000109806	0.00061409	1.67e-05	6.24e-05	3.26e-05	0.000251084	7.38e-05	0.00325118	1.03e-05	1.13e-05	2.26e-05	1.41e-05	1.94e-05	5.47e-06	7e-06	2.98e-05	1.17e-05	8.64e-06	1.59e-05	4.69e-05	0.000414114	0.000204323	0.000266069	2.93e-05	0.000850831	0.001478	0.000593442	1.51e-05	0.000978173	0.00123019	0.00132102	6.52e-05	0.000100484	1.22e-05	1.44e-05	1.58e-05	9.2e-06	1.93e-05	2.19e-05	1.74e-05	7.02e-05	4.21e-05	0.0015558
Monkey 3	0.000217506	0.00438638	0.000913401	0.00107217	0.000179935	0.000329699	5.24e-05	0.00113095	2e-05	3.49e-05	1.69e-05	0.000116001	2.49e-05	0.00228389	1.1e-05	1.09e-05	9.1e-06	1.53e-05	3.49e-05	1.12e-05	1.15e-05	3.26e-05	1.7e-05	2.12e-05	5.38e-06	0	0.00120373	2.98e-05	0	5.7e-05	0.00124881	0.00232408	0.000727051	2.16e-05	0.00123354	0.00112667	0.00284526	3.4e-05	0.000138077	1.6e-05	2.89e-05	2.38e-05	1.92e-05	3.39e-05	2.2e-05	2.26e-05	0.000100103	3.5e-05	0.00157162
Monkey 4	0.000370179	0.0136013	0.00126506	0.00272247	0.000248632	0.000547797	8.75e-05	0.000962078	2.01e-05	0.000119841	2.69e-05	0.000227961	7.33e-05	0.00411318	2.67e-05	2.39e-05	6.44e-06	1.64e-05	2.88e-05	8.56e-06	1.06e-05	4.18e-05	1.05e-05	1.05e-05	6.34e-06	1.28e-06	0.000616491	3.42e-05	7.9e-06	5.55e-05	0.00170411	0.00172641	0.00049421	1.62e-05	0.000305618	0.000638479	0.00175347	3.08e-05	0.000145921	6.41e-06	1.35e-05	3.05e-05	2.5e-05	5.38e-05	1.81e-05	4.24e-05	0.000125759	4.79e-05	0.00157813
Monkey 5	0.000451903	0.00769065	0.000903307	0.000673931	9.48e-05	0.000579628	5.1e-05	0.0025267	2.5e-05	2.45e-05	8.76e-06	0.000113293	0.000101962	0.00127418	2.26e-05	1.29e-05	5.7e-06	1.68e-05	4.26e-05	6.1e-06	1.07e-05	3.95e-05	1.45e-05	7.12e-06	6.89e-06	6.24e-06	0.000633425	3.39e-05	4.64e-06	1.67e-05	0.00180351	0.00314613	0.00110191	2.03e-05	0.0021314	0.00232355	0.00237922	3.48e-05	0.000182032	1.41e-05	1.94e-05	3.44e-05	2.4e-05	5.05e-05	2.07e-05	3.89e-05	0.000181572	8.27e-05	0.00252845
Monkey 6	0.00120887	0.0153834	0.00207552	0.00511248	0.000461504	0.00162324	0.000101514	0.0086421	2.09e-05	0.00048634	4.17e-05	0.000362522	0.000216029	0.0033627	4.65e-05	3.56e-05	1.04e-05	3.29e-05	8.96e-05	1.13e-05	1.92e-05	8.34e-05	1.52e-05	1.07e-05	7.15e-06	4.68e-06	0.000203618	8.73e-05	2.05e-05	3.43e-05	0.00201607	0.00122847	0.000260377	2.02e-05	9.2e-05	0.000198581	0.000762841	6.36e-05	0.000230386	1.8e-05	2.56e-05	2.22e-05	1.59e-05	2.08e-05	2.1e-05	2.61e-05	8.09e-05	3.51e-05	0.00117375
Monkey 7	0.000303154	0.00947718	0.000490772	0.000394017	0.000150571	0.00141154	4.35e-05	0.00129707	1.86e-05	3.58e-05	1.55e-05	8.71e-05	4e-05	0.00149924	5.31e-05	0.000110803	4.59e-05	0.000121118	0.000230278	4.16e-05	5.9e-05	0.00023288	1.89e-05	2.72e-05	2.55e-05	3.62e-06	0.0012378	0.000231428	1.19e-05	4.84e-05	0.0016211	0.00237208	0.00134221	6.72e-05	0.00127165	0.00145493	0.00389888	0.000140585	0.000630534	4.2e-05	3.51e-05	5.14e-05	1.25e-05	2.71e-05	4.53e-05	1.58e-05	0.000270182	0.000137032	0.00349049
Monkey 8	0.000326505	0.00350171	0.00066294	0.00139009	0.000116023	0.000482925	5.34e-05	0.000873632	1.24e-05	2.16e-05	7.29e-06	0.00011075	5.36e-05	0.00239653	7.81e-05	4.35e-05	2.49e-05	6.18e-05	0.000104725	1.53e-05	2.06e-05	9.89e-05	1.8e-05	1.35e-05	1.2e-05	0	0.000416106	0.000125459	0	3.13e-05	0.00152121	0.00246592	0.0009009	2.47e-05	0.00100802	0.00109237	0.00158017	7.23e-05	0.000288361	1.88e-05	1.96e-05	2.58e-05	1.22e-05	2.33e-05	2.69e-05	1.8e-05	0.00010121	5.4e-05	0.00166532
Monkey 9	0.00167894	0.0190837	0.00308802	0.00259141	0.000462033	0.0032229	0.00012851	0.00409095	3.46e-05	8.51e-05	3.64e-05	0.000370983	0.00043328	0.00553424	0.000139257	3.86e-05	2.09e-05	4.14e-05	0.000102343	1.16e-05	2.02e-05	7.31e-05	1.58e-05	1.14e-05	1.35e-05	1.42e-05	0.000373418	9.65e-05	4.84e-05	3.85e-05	0.00127194	0.00191667	0.000648048	3.77e-05	0.000876381	0.00118152	0.00263735	5.83e-05	0.000241304	1.13e-05	2.44e-05	1.87e-05	1.09e-05	1.89e-05	2.5e-05	1.8e-05	0.000106313	4.19e-05	0.0016749
Monkey 10	0.000819012	0.0114795	0.00252179	0.00331266	0.000457542	0.00143532	0.000198368	0.00269035	6.32e-05	0.000461836	8.18e-05	0.000464721	0.000139425	0.00586877	1.98e-05	8.24e-06	4.03e-06	6.14e-06	9.91e-06	6.15e-06	4.59e-06	1.9e-05	9.19e-06	5.29e-06	5.2e-06	2.25e-06	0.000526859	1.94e-05	1.27e-05	1.35e-05	0.00161616	0.00194446	0.000929741	6.96e-06	0.000957482	0.00116571	0.00216596	1.83e-05	6.4e-05	5.79e-06	1.25e-05	1.4e-05	2.22e-05	2.28e-05	1.91e-05	1.76e-05	8.53e-05	2.76e-05	0.00226588
Monkey 11	0.000352377	0.00619291	0.000912761	0.000782597	0.000295539	0.00069531	5.53e-05	0.00361194	1.6e-05	2.98e-05	1.18e-05	0.000131067	6.93e-05	0.00460086	2.65e-05	4.1e-05	2e-05	3.55e-05	8.59e-05	1.17e-05	2.57e-05	8.54e-05	2.74e-05	1.3e-05	1.32e-05	1.94e-05	0.000126527	9.34e-05	3.42e-06	4.13e-05	0.000849637	0.000787479	8.83e-05	5.21e-05	0.00011156	0.000146256	0.000689783	8.14e-05	0.000263028	1.88e-05	2.91e-05	2.61e-05	1.27e-05	1.42e-05	3.99e-05	2.7e-05	9.93e-05	4.12e-05	0.000885178
Monkey 12	0.000126178	0.0017394	0.000428235	0.000480038	0.000139617	0.000161476	3.52e-05	0.000259489	5.14e-06	1.41e-05	9.15e-06	5.66e-05	1.82e-05	0.00127419	1.37e-05	2.95e-05	1.67e-05	2.39e-05	9.64e-05	1.74e-05	2.06e-05	6.51e-05	3.32e-05	2.57e-05	2.34e-05	7.72e-06	0.000368009	6.82e-05	2.84e-05	4.78e-05	0.00061912	0.000658858	0.000749309	3.39e-05	0.000812514	0.000918788	0.00137439	7.96e-05	0.000232979	1.94e-05	6.09e-05	2.44e-05	9.2e-06	1.71e-05	3.16e-05	1.34e-05	8.81e-05	3.04e-05	0.00154694
Monkey 13	0.000434775	0.0127395	0.00062619	0.000783515	0.000570939	0.00109402	2.55e-05	0.00562088	7.52e-06	1.96e-05	6.48e-06	5.93e-05	4.79e-05	0.00196364	2.3e-05	1.38e-05	1.29e-05	1.19e-05	5.02e-05	1.17e-05	1.17e-05	4.31e-05	2.53e-05	2.38e-05	1.14e-05	4.65e-06	0.000255893	4.66e-05	1.36e-05	2.93e-05	0.00074186	0.00117675	0.000471418	2.85e-05	0.00070874	0.00144657	0.00108081	5.04e-05	0.000159857	1.59e-05	2.15e-05	2.41e-05	6.07e-06	1.15e-05	2.59e-05	8.13e-06	5.86e-05	1.79e-05	0.000970797
Monkey 14	0.000494507	0.0231484	0.000942167	0.00104883	0.000280021	0.000340809	4.19e-05	0.00156065	1.25e-05	1.82e-05	7.13e-06	0.00010056	0.000108405	0.0020557	2.92e-05	2.31e-05	1.76e-05	2.01e-05	5.39e-05	1.87e-05	1.87e-05	6.02e-05	1.75e-05	3.18e-05	1.48e-05	1e-05	0.000346344	6.76e-05	1.16e-05	7.78e-05	0.000750331	0.00101549	0.000352189	4.08e-05	0.000721335	0.00106597	0.00131539	6.78e-05	0.000215811	1.67e-05	4.35e-05	3.06e-05	6.96e-06	9.98e-06	3.14e-05	1.18e-05	7.26e-05	1.88e-05	0.000894069
Monkey 15	0.000396075	0.00589859	0.00149992	0.00053782	0.000229902	0.000471752	0.000125138	0.00225939	4.05e-05	0.000107954	5.19e-05	0.0003023	6.11e-05	0.00393734	3.8e-06	5.59e-06	4.11e-06	5.13e-06	1.44e-05	5.89e-06	6.59e-06	1.69e-05	7.09e-06	1.8e-05	4.89e-06	2.65e-06	0.000458327	1.12e-05	4.51e-06	1.85e-05	0.000719537	0.0016838	0.000708087	1.44e-05	0.00107917	0.00165736	0.0016144	2.07e-05	7.4e-05	8.9e-06	1.54e-05	1.93e-05	9.79e-06	1.93e-05	2.55e-05	2.36e-05	0.000121634	3.63e-05	0.0010914
Monkey 16	0.000393912	0.00924539	0.000482337	0.000289124	7.11e-05	0.000709734	4.84e-05	0.00131613	8.88e-06	1.67e-05	5.71e-06	8.43e-05	0.000121656	0.000832567	3.79e-05	4.71e-05	2.07e-05	5.33e-05	0.000132846	1.8e-05	2.96e-05	0.000101361	3.01e-05	3.42e-05	9.31e-06	2.34e-05	9.07e-05	0.000128483	4.56e-05	5.34e-05	0.000495429	0.000554055	0.000173977	4.45e-05	0.000174487	0.000402978	0.000529347	9.97e-05	0.000289716	2.29e-05	3.46e-05	3.13e-05	0	5.39e-06	4.01e-05	9.13e-06	4.41e-05	9.06e-06	0.000494169
Monkey 17	0.000564893	0.01641	0.00113656	0.000503817	0.000233746	0.000905661	5.75e-05	0.0144816	1.53e-05	1.41e-05	1.54e-05	0.00021519	0.000203517	0.00171478	1.74e-05	1.4e-05	1e-05	8.24e-06	2.43e-05	9.6e-06	9.43e-06	2.96e-05	1.15e-05	1.34e-05	7.91e-06	4.3e-06	0.00011933	3.12e-05	7.15e-06	3.05e-05	0.000637691	0.000581455	0.00019472	2.01e-05	0.000190155	0.00037519	0.00054622	3.66e-05	0.000115502	1.29e-05	1.91e-05	1.78e-05	5.55e-06	8.23e-06	2.32e-05	1.19e-05	7.79e-05	2.17e-05	0.000653173
Monkey 18	0.000368495	0.00499763	0.00111875	0.00232693	0.000229585	0.000759123	8.58e-05	0.000853651	3.04e-05	4.1e-05	3.5e-05	0.000272468	6.08e-05	0.00357455	2.21e-05	2.61e-05	4.01e-05	4.29e-05	8.08e-05	1.92e-05	2.18e-05	7.7e-05	1.67e-05	2.2e-05	2.56e-05	0.000103591	0.00031676	0.000205577	0.000186431	8.72e-05	0.000706871	0.00130481	0.000333613	3.18e-05	0.000638193	0.000375575	0.00109741	0.00010757	0.000229268	1.77e-05	4.37e-05	3.7e-05	9.67e-06	1.95e-05	3.1e-05	1.15e-05	9.44e-05	2.44e-05	0.000663461
Monkey 19	0.000572218	0.00608537	0.00116308	0.00110642	0.000185339	0.000577218	0.000183707	0.000724674	2.79e-05	7.27e-05	6.75e-05	0.000366253	9.52e-05	0.00871785	2.62e-05	3.27e-05	1.38e-05	6.63e-05	0.000169412	1.35e-05	3.22e-05	9.38e-05	2.54e-05	1.49e-05	9.7e-06	5.05e-06	0.000401894	0.00013172	1.54e-05	3.75e-05	0.000779431	0.00127088	0.000227324	2.24e-05	0.000134738	0.000299906	0.000578411	9.01e-05	0.00025893	1.82e-05	2.63e-05	2.5e-05	7.36e-06	1.96e-05	3.43e-05	1.73e-05	0.000128872	3.7e-05	0.000642146
Monkey 20	0.000104846	0.000206987	7.35e-05	0.000148904	9.78e-05	9.73e-05	4.26e-05	7.56e-05	7.22e-06	5.95e-06	4.75e-06	4.17e-05	1.8e-05	0.000257341	5.22e-05	0.000106785	4.84e-05	9.26e-05	0.00021528	5.73e-05	7.6e-05	0.000263524	4.34e-05	4.29e-05	3.3e-05	5.25e-05	0.000109047	0.000210203	5.55e-05	6.6e-05	0.000292078	0.000424335	0.000137171	3.46e-05	0.00016954	0.000235524	0.000849961	0.000279552	0.000618956	3.1e-05	4.16e-05	2.99e-05	3.04e-06	6.83e-06	4.28e-05	6.44e-06	9.39e-05	2.2e-05	0.00110256
Pearson Correlation with Stool Water	-0.194769	-0.405271	-0.15731	-0.134524	-0.33555	-0.0202162	-0.163664	0.014333	-0.0862219	-0.0177505	-0.136238	-0.157226	-0.180374	-0.23587	0.105227	0.445927	0.386935	0.398715	0.348911	0.357903	0.39083	0.425177	0.108163	0.0261171	0.386018	0.0830705	0.257974	0.369877	0.123341	-0.0335604	0.219522	-0.0356695	-0.0269548	0.235777	0.155121	0.0373691	0.323465	0.366465	0.449454	0.509555	0.10448	0.270052	0.222692	0.277271	-0.0209474	0.190642	0.503408	0.503391	0.205581
ｔ	-0.842468	-1.8808	-0.675826	-0.575972	-1.51124	-0.0857875	-0.70386	0.0608162	-0.367176	-0.0753211	-0.583448	-0.675454	-0.778022	-1.02977	0.448931	2.1137	1.7803	1.84457	1.57957	1.62617	1.80143	1.99299	0.461603	0.110843	1.77534	0.353661	1.13284	1.68904	0.527317	-0.142465	0.954641	-0.151429	-0.114401	1.02934	0.666187	0.158655	1.45032	1.67103	2.13463	2.51251	0.445709	1.18994	0.969137	1.22437	-0.0888918	0.823937	2.47183	2.47171	0.891245
p	0.410581	0.0762786	0.507742	0.571766	0.148086	0.932582	0.490526	0.952176	0.717769	0.94079	0.566831	0.507973	0.446663	0.31676	0.658839	0.0487624	0.0919132	0.0816225	0.131618	0.121292	0.0884107	0.0616467	0.649896	0.912967	0.0927527	0.727702	0.272148	0.108459	0.604413	0.888295	0.352405	0.881321	0.910186	0.316955	0.51374	0.875708	0.164173	0.112011	0.0467952	0.0217351	0.661122	0.249527	0.34532	0.236598	0.930149	0.420759	0.023651	0.0236566	0.384557
Spearman Correlation with Stool Water	-0.470677	-0.321805	-0.230075	-0.35188	-0.416541	-0.105263	-0.174436	-0.22406	-0.126316	-0.209101	-0.112072	-0.227068	-0.390977	-0.315789	0.0556391	0.246617	0.264662	0.242105	0.184962	0.0248214	0.193306	0.153383	0.0270677	-0.0330827	0.299248	0.0263257	0.183459	0.209023	-0.032343	0.0308503	0.165414	0.0736842	0.172932	0.142857	0.204511	0.0315789	0.297744	0.252632	0.263158	0.376081	0.0842105	0.0992481	0.268522	0.315156	-0.0421053	0.221888	0.380451	0.4	0.356391
ｔ	-2.26329	-1.44201	-1.00303	-1.5949	-1.9439	-0.449089	-0.751593	-0.975406	-0.54024	-0.907196	-0.478497	-0.989206	-1.80223	-1.41204	0.236423	1.07965	1.16438	1.05866	0.798507	0.105341	0.835893	0.658544	0.11488	-0.140435	1.33058	0.111729	0.791788	0.906839	-0.137292	0.130949	0.711593	0.313468	0.744913	0.612372	0.886403	0.134045	1.32324	1.10776	1.15728	1.722	0.358549	0.423163	1.18268	1.40889	-0.178796	0.965458	1.74537	1.85164	1.6183
p	0.0362146	0.166474	0.329138	0.128142	0.067708	0.658728	0.462011	0.342286	0.595654	0.376289	0.638057	0.335674	0.0882801	0.174994	0.815774	0.294552	0.259469	0.303755	0.434986	0.917271	0.414174	0.518524	0.909812	0.889876	0.19994	0.912275	0.438795	0.376472	0.892324	0.897268	0.485838	0.757529	0.46594	0.54795	0.38709	0.894854	0.20232	0.28255	0.262287	0.10221	0.724104	0.677189	0.252324	0.175908	0.860095	0.347109	0.097968	0.0805539	0.122986
[truncated: 517 more columns]
