# Supplementary material for: Multi-Omics Analysis to Generate Hypotheses for Mild Health Problems in Monkeys
Source: Metabolites. 2021 Oct 13;11(10):701. doi: 10.3390/metabo11100701 (PMC8538200; doi:10.3390/metabo11100701)
Supplement: Supplementary file 1 [file metabolites-11-00701-s001.zip › Suppl_Table_S10_Fecal _Oxidized_Fatty_acids.xlsx]

## Sheet: Feces-oxidizedFA
Sample	11,12-DHET	11-HETE	12,13-DiHOME	12,13-EpOME	13,14-dihydro-15-keto-tetranor-PGF1a	13-HODE	13-HOTrE	13-HpODE	13-KODE	14,15-DHET	15-KEDE	20-hydroxy-PGE2	9,10-DiHOME	9,10-EpOME	9-HODE	9-HOTrE	9-HpODE	9-KODE	AA	AEA	DHA	EPA	Lyso-PAF	OEA	PGE2	PGF2a	tetranor-PGEM		Water %	Rank		11,12-DHET	11-HETE	12,13-DiHOME	12,13-EpOME	13,14-dihydro-15-keto-tetranor-PGF1a	13-HODE	13-HOTrE	13-HpODE	13-KODE	14,15-DHET	15-KEDE	20-hydroxy-PGE2	9,10-DiHOME	9,10-EpOME	9-HODE	9-HOTrE	9-HpODE	9-KODE
Monkey 1		38	57701	462775		140404	30796	3891	72454		3836		88739	71918	112130	14590	5227	127023	1327157	80	459358	156807	3540	88548					57.93	19			20	16	17		16	17	16	14		15		12	14	17	13	18	14
Monkey 2		142	110366	958952		339640	49695	15552	92497		2147		156163	86334	297179	26361	24376	128715	2765076	567	822311	286914	35032	184707	1928	1537	8579		74.5	5			11	11	11		11	12	10	13		20		9	13	11	11	11	13
Monkey 3	302	210	322479	2284922		756606	78853	31118	145738		2362		235744	157670	708481	51163	37678	193911	2811484	364	1053499	292667	45933	286400		1791			74.07	6		6	8	6	7		5	8	8	11		19		7	8	5	4	9	11
Monkey 4		75	96555	818023		146838	51304	15500	211167		8514		45910	54344	135666	12542	19910	179186	3185832	267	1295519	257805	26680	99080			6888		65.52	15			15	12	12		13	11	11	6		1		15	17	14	15	12	12
Monkey 5		39	255204	1875333	62166	626389	83722	45759	156202		3101	3238	363349	114028	590271	40869	58484	237389	570417	428	449864	173280	3952	171136		1798	69631		77.21	2			19	8	9	1	7	7	5	10		18	5	4	10	6	7	4	9
Monkey 6		179	462888	2946593	8615	627300	100480	36084	301438		5898		340224	168319	555773	53335	53483	544343	2002591	612	899658	358090	16047	463959		2355			71.46	10			10	4	2	6	6	3	6	2		4		5	6	7	3	6	1
Monkey 7	1891	502	644215	2561907	6405	794613	99081	82405	243568	1200	3149		291271	104288	781098	40575	95307	351329	5783623	522	3206620	642444	128979	653134	797	1359	11603		79.45	1		2	3	3	3	8	4	4	1	4	3	17		6	11	4	9	1	5
Monkey 8		302	61093	746051	9907	146662	34383	15323	133736		4180		37806	98504	141582	10035	17671	201059	4336048	309	1449372	557344	25686	102261		2434	35354		72.62	9			6	15	13	5	14	13	12	12		12		16	12	12	17	13	10
Monkey 9		80	50901	354573	7908	116299	24641	7115	52791		3228		32065	41792	122095	9663	11596	86581	3765547	728	1234745	353653	9489	89640		3515	11468		67.8	12			14	19	18	7	17	18	14	17		16		19	18	16	18	14	16
Monkey 10	305	190	197266	1473702		477267	62675	14692	182839		4335		163391	222968	454718	32070	36348	338123	1359554	741	374941	196254	4011	259537		3676			69.09	11		5	9	9	10		10	10	13	8		9		8	3	9	10	10	6
Monkey 11	807	320	434792	2314847		1130499	75002	56905	235935	582	4261	3777	394218	197429	1255179	45102	70706	332149	1033808	368	692835	342717	14994	367447		2368			72.98	7		4	5	5	5		2	9	2	5	4	11	4	3	4	3	5	3	7
Monkey 12		211	267840	2309740		507507	92223	48974	324438	146	3967		107861	162007	425256	40816	57238	539681	1493586	132	664907	295154	3934	243385		1994			75.36	4			7	7	6		9	5	3	1	5	14		11	7	10	8	5	2
Monkey 13		55	56435	558078		150144	32313	2566	45875		7564		115059	57995	127771	12543	5096	100661	847796	58	420738	98627	3721	62835					62.24	18			18	17	15		12	15	18	18		3		10	16	15	14	19	15
Monkey 14		62	88184	567458		142800	33518	6083	62920		5705	6177	33641	70764	140018	16782	6235	81652	1367362	89	626927	215986	563	52116					57.89	20			17	13	14		15	14	15	16		6	3	17	15	13	12	16	17
Monkey 15		65	79790	492409	11723	89326	14666	793	62927		4279		56770	122881	63096	5996	1800	77202	1471477	191	475739		1579	38225					66.6	14			16	14	16	2	20	20	20	15		10		14	9	20	20	20	19
Monkey 16		116	53430	216530	11512	106058	30864	2186	35116		5395	6940	32775	30660	109860	11004	7435	75329	1017813	288	490374		3462	93859		3866	7463		64.7	17			13	18	20	3	19	16	19	20		8	2	18	20	18	16	15	20
Monkey 17		122	138947	2096086		541549	91974	22656	273233		8019		68597	187678	552382	41875	38696	512352	1849954	447	936666	339613	5025	233675		2698	7418		72.67	8			12	10	8		8	6	9	3		2		13	5	8	6	8	3
Monkey 18	2230	965	715438	2533006		959155	115498	46666	176828	2972	4042	91877	489380	285629	1266884	110293	73003	270811	3733975	858	2213091	591988	25436	632511		1969	3651		67.69	13		1	1	2	4		3	2	4	9	1	13	1	2	1	2	2	2	8
Monkey 19		592	27383	294703	10387	108274	17861	3226	39896		5894		25187	38659	104979	9139	5980	80254	5378434	685	1566601	373534	16625	84800		2172	26894		65.5	16			2	20	19	4	18	19	17	19		5		20	19	19	19	17	18
Monkey 20	1198	395	1024235	3094915		1237053	156056	31486	188809	1438	5453		717025	251627	1415100	118045	39118	355938	1073244	292	709508	345288	8294	296721	1534	1071			76.92	3		3	4	1	1		1	1	7	7	2	7		1	2	1	1	7	4
Pearson Correlation with Stool Water	0.0937613	0.238208	0.550225	0.710003	0.412007	0.651493	0.658936	0.732378	0.618292	-0.593415	-0.389332	-0.065068	0.525825	0.445866	0.568178	0.466467	0.716563	0.593977	0.18049	0.310646	0.31523	0.43747	0.472508	0.543431	-0.986998	-0.732759	0.406756					-0.0116735	0.43609	0.678195	0.714286	-0.219194	0.691729	0.673684	0.784962	0.639098	-0.4741	-0.496241	-0.690451	0.6	0.526316	0.709774	0.556391	0.768421	0.682707
ｔ	0.399556	1.04058	2.79564	4.27761	1.91839	3.64336	3.71661	4.56341	3.33762	-3.12791	-1.79329	-0.276646	2.62274	2.11334	2.92934	2.23738	4.35846	3.13249	0.77854	1.38656	1.40926	2.06402	2.27462	2.74652	-26.0524	-4.56853	1.88905					-0.0495299	2.05597	3.91538	4.33013	-0.953142	4.06388	3.86756	5.37543	3.52538	-2.2845	-2.42503	-4.04952	3.18198	2.62613	4.27484	2.84091	5.0944	3.96402
p	0.694185	0.311845	0.0119478	0.000453038	0.0710647	0.00185893	0.00157915	0.000240877	0.00366388	0.00581309	0.0897461	0.785203	0.0172534	0.0487966	0.00895864	0.038149	0.000378726	0.00575507	0.446365	0.182512	0.175801	0.0537368	0.0353971	0.0132704	9.6222e-16	0.000238179	0.0751058					0.961043	0.0545841	0.00101406	0.000403253	0.353144	0.000728485	0.0011281	4.1498e-05	0.00241658	0.0346986	0.0260515	0.000752155	0.00516293	0.0171307	0.000455839	0.0108418	7.57188e-05	0.000909909
Spearman Correlation with Stool Water	-0.0116735	0.43609	0.678195	0.714286	-0.219194	0.691729	0.673684	0.784962	0.639098	-0.4741	-0.496241	-0.690451	0.6	0.526316	0.709774	0.556391	0.768421	0.682707	0.114286	0.32782	0.222556	0.320476	0.487218	0.699248	-1	-0.701161	0.453122
ｔ	-0.0495299	2.05597	3.91538	4.33013	-0.953142	4.06388	3.86756	5.37543	3.52538	-2.2845	-2.42503	-4.04952	3.18198	2.62613	4.27484	2.84091	5.0944	3.96402	0.488071	1.47217	0.968517	1.43537	2.36704	4.14987	#DIV/0!	-4.17217	2.15653
p	0.961043	0.0545841	0.00101406	0.000403253	0.353144	0.000728485	0.0011281	4.1498e-05	0.00241658	0.0346986	0.0260515	0.000752155	0.00516293	0.0171307	0.000455839	0.0108418	7.57188e-05	0.000909909	0.631392	0.158244	0.345621	0.168332	0.029342	0.000601642	#DIV/0!	0.000572547	0.0448148
[truncated: 9 more columns]
