# Supplementary material for: Multi-Omics Analysis to Generate Hypotheses for Mild Health Problems in Monkeys
Source: Metabolites. 2021 Oct 13;11(10):701. doi: 10.3390/metabo11100701 (PMC8538200; doi:10.3390/metabo11100701)
Supplement: Supplementary file 1 [file metabolites-11-00701-s001.zip › Suppl_Table_S11_Plasma_Oxidized_Fatty_acids.xlsx]

## Sheet: Plasma-oxidizedFA
Sample	10-HDoHE	11,12-DHET	11-HDoHE	11-HETE	12,13-DiHOME	12,13-EpOME	12-HEPE	12-HETE	12-HHT	12-HpEPE	12-HpETE	12-keto-LTB4	13,14-dihydro-15-keto-PGE2	13,14-dihydro-15-keto-PGF2a	13-HDoHE	13-HODE	13-HOTrE	13-HpODE	13-KODE	14,15-DHET	14,15-DiHETE	14-HDoHE	15-HEDE	15-HEPE	15-HETE	15-HETrE	15-HpETE	15-KEDE	16-HDoHE	16-HETE	17,18-DiHETE	17-HDoHE	17-HETE	18-HEPE	18-HETE	19-HETE	20-carboxy-AA	20-HDoHE	20-HETE	4-HDoHE	5,6-DHET	5,6-DHET-lactone	5,6-DiHETE	5-HEPE	5-HETE	6-keto-PGF1a	6-trans-LTB4	8,9-DHET	8-HDoHE
Monkey 1	7.3	51.5		8.2	782.2	1396.8		53	18.5		33.4		4.1		2.1	1142.6	100.2	240.2	150.3	73	74.6	30.6	6.4		14.7		9.5		8.4	54.1	176.4	9.7	12.2	3.9	39.5	32.4	409	18.7	18.4		2.5	18.3		4.1	22.8	1.5		18.4
Monkey 2	14.1	170.4		20.9	2806	3876.7	7.9	164.5	66	18.5	328.4		33.5	20.7	7.8	2566.4	202.3	2386.4	1557.8	142.6	118	162.6	47.2	4.7	46.9	6.6	43	58.3	15.5	38.5	236.4	57.8	10.2	8.3	52	83.7	2140.3	37.4	182		16.7	21.6	750.7	6.5	64.1	6.4	1.9	34.4	22.8
Monkey 3	7.3	59.4	4.4	9.6	1144.5	3289.2		33.6	14.9		26.3			7.9	4.1	1700.2	109.3	500.6	260.1	72.3	49.3	25.7	18.8		18.1		16.4		10.3	50.3	101.2	12.7	7	4.6	81.8	39.9	517.4	28.6	86.6		4.7	32		3.8	31.6	1.2		18.2
Monkey 4	13.1	128.2		15.9	4102.1	12439.7	1.9	50.2	7.4		29.2		5.9		6	3171.9	259	779.9	449.6	139.5	112.7	20.6	13.2	3.4	32.4	5.2	13.5		16.3	57.9	286.9	15.1	16.3	13.9	85.9	69.4	1430.9	51	84.3	12.7	7.6	19.4		11.2	61.7	1.8		34	30.8
Monkey 5	16.2	83.1		28.8	1006.1	6077.1		44.3	47.1		56	1.2		5.6	29.1	1426.1	95.2	726.3	366.1	94	78.3	38.4	17.2		41.1	197.1	13.6		24	45.3	350.2	25.3	10.5	6.2	164	59.9	953.1	41.7	86.8	7.2	5.1	26.3		3.4	32.4	1.7		27.4	16
Monkey 6	11.9	61.2		17.5	3053.3	7591	6	94.6	11.4		81.7			11.5	6.3	3320.2	258.7	583.8	380.6	77.5	76.8	82.7	58.2		34.1	14.1	9.9		10.6	44.6	168.5	15.7	12.8	7.6	273.1	67	546	26.2	51.1		6.1	18.3	155.6	11.8	47.7	0.4		19.1	19.6
Monkey 7	8.7	55.6		9.1	3660.1	6841.2	5	48.5	27.5		37.2		9.4		5	4155.7	386	661.7	431.2	80	87.9	37.5			15.4		11		11.5	53.6	185.3	8.7	12.2	9.8	249.9	60.6	461.5	26.6	30	11.6	2.8	20.9		6.3	16.9	2.6		9.9	29.7
Monkey 8	13.5	109.1		15	3144.5	9077.7		50.1	48.1		51.7		9.2		8.9	2628	241.5	839.4	424.1	113.1	100.3	61.6	19.3		22	4	23.1		12.8	53	202.9	40.8	12.9	9.6	123.4	76.6	970	32.5	80.4		10.8	33.8	130.9	17.3	60.7	1.5		27.1	31.3
Monkey 9	12.3	67.9		12.2	1800.4	6295.7	3	49.6	16.8		47.7		7.3	4.1	9.1	1842.2	148.3	698.4	395.3	92.8	79.3	26.5	14		19.6	2.3	18.9		12.6	47.6	118.4	16.9	16.3	7.7	62.8	63.2	642.4	23.5	97.5	10	4.8	24.1		7.4	42.1	2.6		14.7	22.4
Monkey 10	9.8	60.2	10.7	16.7	3659.6	8140.6	4.6	81.7	16.1		26.1			9.6	6.2	4203	351.7	601.1	426	76.4	79.8	46.8	48.1		36.8	12.9	12.4		11.5	35	247.8	37.1	10.4	7.8	631.2	91.3	525.4	32.5	54	13.9	3	23.4		7.8	41.7	1.5		12.5
Monkey 11	11.4	69.8	8.9	19.3	1980.4	8306.1	3.6	69.2	41		53.9			9	8.3	2504.3	135.8	866	521.4	70.9	65.9	38.8	27.3		27.3	38.8	15.4	11	14.9	36.5	144.2	17.3	8.1	6.5	199.3	66.7	666.2	44.2	124.3		3.8	24.9		6.6	39.6	3.9		15.5	25.7
Monkey 12	6.9	81.7		16.8	1429.8	8766.8	3.7	99.3	92.7		36.4				5.6	1608.8	86.8	914.1	551.9	94.9	75.1	112.1	42.2		32.9	6.6	15.3	18.8	11.9	32.4	166.5	25.6	13.9	5.3	61	66.5	1193.6	30.2	156.8		7.3	25.2	247.7	5.9	28	5.4		22.9	22
Monkey 13	7.2	33		10.5	826.7	3810.7		27.8	15.2		38.5				2.2	1040.9	72.1	93.1	73.7	45.7	43.5	24.1	11.6		25.4	7.3	8		10.4	33.7	110.9	15.3	7	10.9	121.2	17.3	582.1	19.6	49.8		3.2	16.5			22.5	2.2		10.7
Monkey 14	9.9	61.4		10.5	1194.6	3760.7	2.6	54.2	22.6		17.9				7.4	1359.1	78.9	538	304.6	72	68.6	47.4	11.6		19.6	7.9	13.1		25.2	35	162	23.7	12.4	5.9	374.9	88.7	695	46.9	69		3.9	24.2		6.1	27.4	0.5		16.2	20.4
Monkey 15	21.6	82		17.3	1787.2	7112.4	6.8	170.6	43.9		63.4				9	1682.5	121.1	648.6	391.1	86.5	73.6	115.2	22.1		33	5.6	15.5		13.9	46.1	239.3	27.7	12.6	5.3	39.9	45.7	842	38.4	109.7		9.7	28.5	140.8	5.3	39.6	2.5		20.2
Monkey 16	8.4	59.5		10.9	2082.1	4556.8	3	42.5	24.3		18.6				5.2	2930.4	201.8	427.7	294.4	67.3	52.2	12.1	30.4		22.9	4.2	10.4		14.9	48.7	130.6	18	10	7.5	75.7	44.6	413.6	26.6	65	8.8	5	32.8	44.5	12.2	42	-0.2		18
Monkey 17	15.1	60		18.5	2226.9	13201.3	1.8	38.7	8.5				8.3		6.7	2028.1	139.9	508	280.9	60	100	27.1	30.8		29.2	7.6	12.5		16.3	39.4	171.3	24.9	7.7	10	43.4	84.5	982.3	47.5	132.5		3.3	36.5		13.7	69.3	1.2		14.7	36.3
Monkey 18	8	59.8		67.5	1769.1	4395.9	2.8	76.5	25.5		25.9				76	2435.7	118.8	539.8	284.6	86.1	66.5	21.1	42.3	6.5	69.8	536	9.5		21.9	38	223.5	26.5	8.1	9	240	76.2	437.1	45	115.1		4.9	23		5.6	44.7	1.4		11.5	26.2
Monkey 19	5.3	46.2		9	1581.8	7048.5		50.3	9.3		20.3		6.3		4.3	1999.2	118.6	445	266.8	45.8	45	38.6	26.4		12.7	2.4	13.4		5.8	26.7	63.4	11.8	4	5	62.6	36.4	349.1	14.2	29.6		4.1	31.3		9.2	39.1	2.3		8.6	21.2
Monkey 20	12.9	45.5	10.1	11	2205.2	12697		70.8	10.3		14.3				6.6	1998.2	147.6	554.3	304.7	51.1	58.3	45.1	22.8		27.3	4.3	9.2		9.1	29.1	94.3	34.8	6.3	6.3	39.1	45.9	362.8	22.8	55.5		5.4	30.5	87.6	5.5	35.9	1.7		8.1	23.2
Pearson Correlation with Stool Water	0.243829	0.230078	-0.243031	0.109898	0.333815	0.430917	0.378689	0.145581	0.369165	#DIV/0!	0.251509	#DIV/0!	0.469444	0.229857	0.0558828	0.343792	0.330286	0.41597	0.374411	0.192179	0.267665	0.275188	0.43136	0.140804	0.194039	0.0582681	0.26803	0.30981	-0.060931	-0.0220317	0.161129	0.295009	-0.102662	0.0559581	-0.0642819	0.230801	0.232038	0.0781304	0.34989	-0.218705	0.24446	0.266727	0.373668	-0.0401626	0.136239	0.375579	#DIV/0!	0.108039	0.0833661
ｔ	1.06667	1.00305	-1.06296	0.4691	1.50244	2.02598	1.73592	0.624299	1.68528	#DIV/0!	1.1025	#DIV/0!	2.25568	1.00203	0.237462	1.55326	1.4846	1.94068	1.7131	0.830835	1.17861	1.21441	2.02853	0.603392	0.839188	0.247631	1.18034	1.38243	-0.258989	-0.0934953	0.692662	1.30992	-0.437872	0.237783	-0.27329	1.00638	1.01208	0.332495	1.58462	-0.950906	1.06961	1.17416	1.70915	-0.170533	0.583451	1.71932	#DIV/0!	0.461068	0.354928
p	0.300218	0.329132	0.301853	0.64463	0.150324	0.0578505	0.0996631	0.540264	0.109193	#DIV/0!	0.284767	#DIV/0!	0.0367728	0.329609	0.814981	0.137766	0.154952	0.0681243	0.103866	0.416952	0.2539	0.240283	0.0575656	0.553776	0.412371	0.807222	0.253227	0.183754	0.798582	0.926543	0.497361	0.206697	0.666688	0.814735	0.787741	0.327572	0.324914	0.743356	0.130464	0.354247	0.29893	0.255631	0.104608	0.866493	0.566829	0.102705	#DIV/0!	0.650272	0.726768
Spearman Correlation with Stool Water	0.300113	0.213534	-0.429806	0.371568	0.296241	0.374436	0.458809	0.0691729	0.314286	#DIV/0!	0.324836	#DIV/0!	0.934529	0	0.231579	0.249624	0.267669	0.586466	0.488722	0.306767	0.335338	0.305263	0.421237	0.188982	0.281415	0.200007	0.291839	0.654654	0.00677456	-0.0248214	0.142857	0.263158	-0.0534639	0.0676946	-0.0240602	0.159398	0.222556	0.105342	0.372932	-0.22394	0.222556	0.218879	0.482795	-0.21102	0.02783	0.35884	#DIV/0!	0.0857465	0.0882398
ｔ	1.3348	0.927336	-2.01957	1.698	1.31591	1.71323	2.19076	0.294181	1.40457	#DIV/0!	1.45718	#DIV/0!	11.1408	0	1.00996	1.09369	1.17863	3.07191	2.37664	1.36743	1.51016	1.36004	1.97051	0.816497	1.24423	0.866059	1.29452	3.67423	0.0287427	-0.105341	0.612372	1.15728	-0.227153	0.287864	-0.102108	0.685029	0.968517	0.449431	1.70524	-0.974857	0.968517	0.951703	2.33898	-0.915906	0.118118	1.63106	#DIV/0!	0.365137	0.375836
p	0.198581	0.366021	0.0585715	0.106729	0.204718	0.103841	0.0418722	0.771985	0.17717	#DIV/0!	0.162291	#DIV/0!	1.65276e-09	1	0.325899	0.288513	0.253892	0.00657062	0.028772	0.188323	0.148357	0.190609	0.0643587	0.424891	0.229376	0.397855	0.211846	0.00173543	0.977386	0.917271	0.54795	0.262287	0.822865	0.776739	0.9198	0.502052	0.345621	0.658486	0.105348	0.342551	0.345621	0.353853	0.0310701	0.371824	0.907282	0.12025	#DIV/0!	0.719265	0.711432
[truncated: 22 more columns]
