# Supplementary material for: Multi-Omics Analysis to Generate Hypotheses for Mild Health Problems in Monkeys
Source: Metabolites. 2021 Oct 13;11(10):701. doi: 10.3390/metabo11100701 (PMC8538200; doi:10.3390/metabo11100701)
Supplement: Supplementary file 1 [file metabolites-11-00701-s001.zip › Suppl_Table_S12_Urinary_Oxidized_Fatty_acids.xlsx]

## Sheet: Urine-oxidizedFA
Sample	tetranor-PGEM	20-hydroxy-PGF2a	20-hydroxy-PGE2	18-carboxy-dinor-LTB4	2,3-dinor-8-iso-PGF2a	13,14-dihydro-15-keto-tetranor-PGE2	8-iso-PGF3a	11-beta-PGF2a	PGF2a	8-iso-PGF1a	PGE2	11-dehydro-TXB2	PGK2	PGA2	12,13-DiHOME	9,10-DiHOME	9-HOTrE	13-HOTrE	Lyso-PAF	13-HODE	9-HODE	13-KODE	9-KODE	OEA	AA
Monkey 1	36.7252		8.43783	2.2087		1.07239			1.08562		0.446013	1.46782	0.0794187		36.4863	17.7132	12.3908	16.4602	0.498428	60.5259	76.0236	11.1363	24.1222	0.447483	19.6802
Monkey 2	32.5452		22.2813	1.9954	0.444901	0.960993	3.8706	0.228523	4.33202	0.282332	0.620865	0.573466	0.0393245	0.249495	1.44674	0.713735	0.385265	0.366226	0.137742	2.48934	3.64913	0.376983	1.07725	0.0172378
Monkey 3			25.3399	1.41188		0.623579	3.5491	0.888084	2.12676	0.731534	0.16728	0.543708	0.0357279	0.0563588	0.467965	0.25555		0.0954561	0.009265	0.295322	0.427903	0.0695051	0.231824	0.00751753
Monkey 4	8.21382		12.5773	1.90379		1.01343	3.11749	1.13087	2.39682	0.740591	1.15235	0.377263	0.0628011	0.208301	1.45859	0.634163	0.301783	0.481791	0.0236247	1.70806	2.55843	0.322039	0.784077	0.00963019
Monkey 5	32.9824		10.5811	4.9526	0.550761	0.548983	2.45301		0.346371	0.114717	0.64868	0.237898		0.181043	1.86458	1.072		0.681598		4.47265	6.79063	1.38067	3.04362	0.0176485
Monkey 6	24.1022	3.26434	21.6535	2.5006	0.335504	0.681965	3.04406	0.363297	2.12387	0.626981	0.182722	0.263755	0.0429122	0.0813227	0.16185	0.052883		0.0923601	0.0256743	0.258283	0.519928	0.0421508	0.314182	0.000487302
Monkey 7	23.5488			1.92385		0.714508	3.37797	0.135459	1.07226		0.670977	0.209785	0.0610912	0.0450337	0.26535	0.117958		0.0890066	0.0226954	0.677384	1.02044	0.147785	0.481399	0.00310869
Monkey 8	12.3475			3.39375		0.307024	2.45841	0.515306	1.09634		0.0647509	0.179427	0.0195353		0.248061	0.117758				0.894546	1.09351	0.103017	0.36606
Monkey 9	15.3861		4.48607	2.02008	0.292977	0.227482	2.54667	0.205685	0.495895		0.383714	0.478921	0.0119638	0.0302141	0.161162	0.0477806			0.0126155	0.340384	0.400643	0.0610338	0.321238	0.000694567
Monkey 10	7.75494	8.55458	24.6246	2.87474	0.415925	0.827543	4.19538	0.653318	1.69742	0.175517	0.196632	0.314863	0.0423052		0.200808	0.0972121		0.179268	0.0184888	0.629005	0.534669	0.0901477	0.0685091	0.0174428
Monkey 11	14.0377	5.90105	35.0562	2.03437	0.241153		4.4851		1.65595	0.273445	0.234334	0.263498	0.043552		0.225174	0.119338	0.135771	0.0689282	0.0193332	0.193711	0.23545	0.0406506	0.138876	0.00416915	3.15365
Monkey 12	14.812			1.72844	0.348289	0.600483	4.30765	0.463967	2.78678	0.237437	0.233716	0.449209	0.0450945	0.0552845	0.383304	0.186119	0.106031	0.144819	0.0295867	0.462192	0.609281	0.135464	0.362524	0.00283425
Monkey 13	34.8836			4.01529	0.523521	0.827665	5.54825		1.43494	0.435721	0.208869	0.33319	0.049064	0.0668168	0.280449	0.115761		0.267943	0.00798764	0.979722	0.949117	0.170238	0.259074	0.00406559
Monkey 14	5.58337	3.97713		2.41503	0.290878	0.645898	1.89892		1.46072	0.30371	0.174387		0.0596938		0.426956	0.219316		0.199486	0.0106734	0.842136	0.814567	0.223255	0.175557	0.00141961
Monkey 15	17.6694		4.83967	2.09424	0.328442	0.438601			0.512787		0.0837383		0.0334503	0.0422506	0.825409	0.377491	0.212026	0.350357	0.0284648	2.46464	1.85639	0.604611	0.659663
Monkey 16	11.1791			1.46631	0.361833	0.547328		0.304346	0.767989	0.128745	0.143893	0.327583	0.0440368		0.583285	0.232801	0.0943263	0.116968	0.00790938	1.36826	1.44523	0.213304	0.543612	0.00222161
Monkey 17	20.5052		33.1196	2.24926	0.668903	0.699178	7.00041	0.549554	3.62015	1.44268	0.272664	0.596222	0.13513		1.00249	0.388443	0.113966	0.363752	0.0223567	1.00519	1.24794	0.199072	0.533774	0.00730847
Monkey 18	41.5349	13.5807	17.8914	2.32759	0.339544	0.416327	2.96266	0.282871	0.853333	0.191307	0.117762	0.255886		0.0123225	0.371155	0.154145		0.250985	0.00171316	0.825078	0.952726	0.116805	0.570366	4.15e-05
Monkey 19	32.7357		27.1564	3.04419	0.621027	0.76965	8.35821	0.259408	2.14546	0.597102		0.561728	0.077501	0.030794	0.605835	0.258242		0.223905	0.0371004	0.798607	1.18461	0.113241	0.396839	0.0156233
Monkey 20	100.863		67.5186	5.66468	0.997346	0.644244	14.2056	1.13056	3.44776	1.37108		2.99177	0.266856	0.200125	3.71935	1.68862	0.97069	1.30009	0.133028	5.14393	10.3801	0.865026	2.51839	0.0392077
Pearson Correlation with Stool Water	0.264633	0.120024	0.539573	0.194021	0.376831	-0.226903	0.191518	0.0613553	0.31803	0.241205	0.149423	0.0334968	0.214196	0.310054	-0.412989	-0.410414	-0.676317	-0.430012	-0.289364	-0.417632	-0.390709	-0.406927	-0.38479	-0.420928
ｔ	1.16425	0.512928	2.71898	0.839106	1.726	-0.988451	0.827865	0.2608	1.42318	1.05448	0.641147	0.142195	0.930351	1.38363	-1.9239	-1.90947	-3.89537	-2.02076	-1.28254	-1.95007	-1.80077	-1.89	-1.76871	-1.96876
p	0.259522	0.614239	0.0140723	0.412415	0.101472	0.336034	0.418589	0.797207	0.171786	0.305612	0.529507	0.888506	0.3645	0.18339	0.0703274	0.0722727	0.0010603	0.0584372	0.215926	0.0669188	0.0885181	0.0749714	0.0938847	0.0645754
Spearman Correlation with Stool Water	0.191507	0.0974355	0.451959	-0.0571429	0.315091	-0.175504	0.130499	-0.003656	0.231579	0.00271269	0.324003	-0.168061	-0.0911386	0.32357	-0.0105263	0.0706767	-0.0527445	-0.136999	0.26392	-0.135338	-0.0225564	-0.0947368	0.108271	0.196864	-1
ｔ	0.827816	0.41536	2.14957	-0.242833	1.40857	-0.756341	0.558436	-0.0155112	1.00996	0.011509	1.45301	-0.723309	-0.388285	1.45084	-0.0446619	0.300608	-0.224088	-0.586771	1.16088	-0.579524	-0.095723	-0.40375	0.46207	0.851893	#DIV/0!
p	0.418615	0.682788	0.0454356	0.81088	0.176003	0.45923	0.583428	0.987795	0.325899	0.990944	0.163433	0.478785	0.70236	0.164029	0.964869	0.767158	0.825213	0.564645	0.260857	0.569419	0.924798	0.691153	0.649567	0.405465	#DIV/0!
