# Supplementary material for: Multi-Omics Analysis to Generate Hypotheses for Mild Health Problems in Monkeys
Source: Metabolites. 2021 Oct 13;11(10):701. doi: 10.3390/metabo11100701 (PMC8538200; doi:10.3390/metabo11100701)
Supplement: Supplementary file 1 [file metabolites-11-00701-s001.zip › Suppl_Table_S13_Metallomics_Plasma_Feces_Urine.xlsx]

## Sheet: Sheet1
Sample	Plasma/Urine/Feces	24 Mg	44 Ca	56 Fe	63 Cu	66 Zn	52 Cr	55 Mn	59 Co	78 Se	23 Na	27 Al	28 Si	31 P	34 S	35 Cl	39 K	60 Ni	85 Rb	90 Zr	95 Mo	137 Ba	208 Pb
Monkey 1	Plasma	13.6123	72.1823	2.15296	1.32354	2.37675	79.6706	39.2364	86.279	116.329	526293	1229.13	1274.64	5279.67	60896.7	1.73345e+06	60635.8	15.2328	25.365	220.369	23.6275	43.189	14.2065
Monkey 2	Plasma	15.8965	85.5592	2.9115	0.919888	1.88638	71.0288	18.5066	79.5419	101.441	574468	2030.52	735.348	15529.4	41409.1	1.6389e+06	72809.5	12.1863	60.2467	272.843	5.90673	107.986	13.729
Monkey 3	Plasma	15.2853	93.8685	2.65533	0.779597	0.758641	96.0397	21.2926	77.2487	100.834	595542	1635.41	735.355	12733.9	60896.7	2.11255e+06	69783.3	12.9479	39.6341	278.191	7.08807	29.8993	16.7143
Monkey 4	Plasma	16.3589	83.9338	2.43145	0.750633	1.23985	112.263	34.8951	77.4575	109.833	633107	1163.35	882.423	12733.9	56025.3	2.06648e+06	65726.7	14.4711	33.2921	244.456	22.4462	9.9662	12.5349
Monkey 5	Plasma	12.2844	76.511	2.86965	0.617229	0.95791	75.7605	19.9636	75.3555	92.0655	545861	1163.36	1568.81	8696.09	31665.7	1.86879e+06	52910	12.1861	31.707	203.241	7.08806	9.9662	17.6697
Monkey 6	Plasma	12.5939	74.8049	2.14657	0.683422	1.19683	61.7948	9.26067	75.3873	118.653	513642	1657.26	1029.5	9627.9	85257.1	1.79861e+06	60840.4	10.6628	31.7066	205.911	11.8135	8.30515	12.4154
Monkey 7	Plasma	13.638	80.4342	3.29285	0.7039	0.812686	89.9367	32.8775	81.1225	83.505	530278	921.798	1323.66	8385.5	77948.8	1.69826e+06	67356.8	15.9945	26.1576	235.351	15.3577	8.30515	15.0424
Monkey 8	Plasma	13.7278	81.1532	2.48342	0.67078	1.09807	106.727	10.368	75.6231	101.344	565672	1020.61	784.372	7453.76	75512.9	2.26837e+06	60989.2	12.1861	26.9503	139.56	10.6322	23.2548	38.1117
Monkey 9	Plasma	13.3492	84.5047	2.47178	0.65502	1.5182	100.381	24.2816	77.7991	92.1356	525807	1624.31	1127.55	9627.91	41409.4	2.02058e+06	61685.2	6.8546	32.4994	155.608	8.26943	23.2553	18.8642
Monkey 10	Plasma	12.5958	86.0399	2.5713	0.595459	1.01312	81.8252	17.366	76.0618	92.5209	514598	1229.16	2059.07	10559.7	63332.7	2.07604e+06	57997	15.2328	32.4994	172.731	8.26944	43.1887	19.1035
Monkey 11	Plasma	10.2836	67.5568	2.84189	0.682991	1.02877	102.858	23.9662	75.3982	83.505	503955	1778.01	1078.52	4969.11	75513	1.64549e+06	57485.7	18.2795	36.4631	157.75	16.5391	18.2716	14.6844
Monkey 12	Plasma	14.0412	96.5536	3.59925	0.813669	0.8904	104.739	38.6792	76.3083	83.505	595866	1393.82	784.374	13976.3	21922.2	2.46487e+06	75502.2	14.4714	44.3909	210.728	8.26944	11.6273	16.2366
Monkey 13	Plasma	13.6386	83.6642	3.02387	0.741891	0.876471	147.803	28.5802	77.3747	100.797	567454	1009.63	1862.96	11802.1	51152.9	2.15059e+06	57716.6	15.2328	40.4271	136.883	8.26948	16.6105	14.4455
Monkey 14	Plasma	13.5634	82.8762	2.71116	0.662254	1.05915	124.688	23.4581	75.5278	118.183	593614	1075.46	882.422	9938.48	63333.5	3.35692e+06	74626.6	10.6628	43.5979	185.039	8.26944	13.2883	17.5505
Monkey 15	Plasma	16.2903	85.6873	2.99051	0.948302	2.30822	114.925	20.4182	75.7601	92.299	607383	1481.69	784.372	13044.5	51152.9	3.50345e+06	65430	5.33135	50.7329	290.502	8.26943	8.30517	13.8483
Monkey 16	Plasma	12.4978	72.5326	1.96614	0.647401	0.852926	73.9968	10	71.6961	100.872	469225	713.273	1323.65	11491.5	63332.7	3.0384e+06	58121.5	3.80809	34.8776	211.266	10.6322	16.6106	10.0275
Monkey 17	Plasma	11.5262	74.5487	3.89561	0.685736	1.47544	78.9968	11.0535	73.1125	100.59	513042	1042.58	1372.68	16150.6	56024.7	1.87284e+06	63261.9	6.8546	35.6703	265.347	9.45079	16.6105	14.2065
Monkey 18	Plasma	15.4112	75.1858	1.25796	0.606558	2.26681	169.223	10	75.2226	109.847	486952	526.708	1716.85	10802.1	26665.6	2.16746e+06	68408.2	9.90128	34.6342	462.659	20.7164	24.9165	10.7438
Monkey 19	Plasma	13.8381	73.0352	2.36259	0.808572	0.757996	90.035	23.2761	83.7951	100.641	491796	1652.37	635.348	16476.4	33205.5	1.51565e+06	62752	45.7031	37.6275	274.249	9.34993	33.2216	10.3856
Monkey 20	Plasma	13.0314	82.5367	1.71345	0.874412	0.765229	77.27	14.2688	75.9374	92.3184	545699	713.286	1617.82	11180.9	51152.9	2.30357e+06	67250.9	10.6628	38.0485	386.964	16.5391	11.6272	13.6098
Pearson Correlation with Stool Water	Plasma	-0.136378	0.195612	0.42503	-0.341354	-0.298579	-0.333067	-0.150828	-0.202782	-0.625925	-0.00412586	0.221508	-0.0782622	0.0674703	-0.0014674	-0.399108	0.0385028	-0.049863	0.00366673	0.0496719	-0.274992	0.0336565	0.206561
ｔ	Plasma	-0.584059	0.846258	1.99215	-1.54079	-1.32731	-1.49865	-0.647312	-0.878584	-3.40509	-0.0175047	0.963719	-0.33306	0.286906	-0.00622567	-1.84673	0.163475	-0.211814	0.0155567	0.211	-1.21348	0.142874	0.895678
p	Plasma	0.566429	0.408519	0.0617459	0.140764	0.200997	0.151297	0.5256	0.391204	0.00315574	0.986227	0.347956	0.742937	0.777461	0.995101	0.0812943	0.871966	0.834632	0.987759	0.835257	0.240631	0.887977	0.382247
Spearman Correlation with Stool Water	Plasma	-0.144361	0.198496	0.342857	0.0421053	-0.281203	-0.389474	-0.114329	-0.0571429	-0.582832	0.106767	0.120301	0.0293343	-0.0586466	-0.0806332	-0.245113	0.171429	0.106847	-0.0413689	0.150376	-0.204897	-0.242379	0.271531
ｔ	Plasma	-0.618955	0.859246	1.54848	0.178796	-1.24321	-1.79406	-0.488257	-0.242833	-3.04303	0.455578	0.514127	0.124509	-0.249246	-0.343215	-1.07265	0.738238	0.455925	-0.175664	0.645329	-0.888147	-1.05993	1.19698
p	Plasma	0.543701	0.401504	0.13891	0.860095	0.229741	0.089619	0.631263	0.81088	0.00699796	0.654142	0.613418	0.902292	0.805993	0.735412	0.297601	0.469886	0.653897	0.862519	0.526855	0.386176	0.303192	0.246843
Sample	Plasma/Urine/Feces	24 Mg	44 Ca	56 Fe	66 Zn	55 Mn	63 Cu	59 Co	52 Cr	78 Se	23 Na	27 Al	28 Si	31 P	34 S	35 Cl	39 K	47 Ti	51 V	52 Cr	60 Ni	69 Ga	85 Rb	88 Sr	89 Y	90 Zr	95 Mo
Monkey 1	Feces	760.392	3789.4	471.669	110.139	49.7334	9.36541	1.73275	406.896	51.0021	895.376328359261	1137	2111.56	173874	3914.78	256744	36423.3	146.095	7.3891	26.7874	37.8266	26.9028	73.2317	168.613	11.1928	38.5783	28.8311
Monkey 2	Feces	1844.52	8954.72	456.695	282.997	129.425	24.022	4.97789	515.173	119.54	72759.8	1728.76	4415.58	615598	32224.3	907976	111520	253.021	21.9462	62.3431	159.522	84.5735	183.792	624.95	19.2912	37.1117	51.7182
Monkey 3	Feces	1670.69	7634.62	443.28	236.135	107.756	19.0816	3.95723	518.102	45.2596	49625.1	1256.94	2951.37	366681	27076.8	674651	89690.3	148.02	12.0151	37.5899	83.9994	44.2591	162.33	379.619	12.1084	12.7721	26.7999
Monkey 4	Feces	2886.84	17992.7	792.894	492.711	223.613	40.7322	7.17974	869.455	220.155	5497.64	2525.54	5528.58	956855	23734.2	1.09165e+06	301937	300.999	37.7736	73.7584	171.335	108.032	509.477	1115.71	27.0167	22.992	53.6483
Monkey 5	Feces	856.183	5003.64	264.005	135.051	64.601	10.93	2.50591	333.474	59.8173	15853.2	2123.1	4524.05	788949	26236.1	688668	207239	319.699	28.7451	68.0028	179.805	68.8988	409.461	776.63	20.5262	32.356	70.3915
Monkey 6	Feces	1914.53	9156.87	519.005	263.25	125.417	22.8827	4.92269	497.299	105.359	51278.8	1959	6132.85	931502	45465.3	1.22707e+06	276113	248.73	28.6111	81.292	222.713	116.833	422.843	928.119	26.9762	37.0296	60.0361
Monkey 7	Feces	1462.63	6857.96	415.196	225.975	105.545	18.2489	3.91724	547.538	72.6794	44641.4	2222.04	5424.59	871704	64233.9	1.11002e+06	217721	284.256	35.8378	101.631	234.156	119.89	384.396	995.61	27.2743	63.8319	80.5666
Monkey 8	Feces	1938.24	9993.67	493.436	265.654	126.333	24.5216	4.90068	1112.6	107.578	29986.6	4125.92	8440.81	1.38892e+06	70489.3	1.65891e+06	373770	508.903	55.663	245.107	377.441	154.834	625.701	1342.14	39.9229	68.1232	137.028
Monkey 9	Feces	2150.08	12116.8	532.701	315.626	145.877	30.7773	5.81089	1417.49	99.1099	70548.4	4124.81	7716.08	1.51709e+06	57810.6	2.08017e+06	486693	538.718	69.0642	278.614	426.965	184.121	831.051	1572.94	39.5769	59.128	180.796
Monkey 10	Feces	586.985	2932.31	128.384	79.073	37.5968	6.97298	1.48322	142.42	14.0433	79495.5	2982.14	6537.54	1.30299e+06	54446.7	1.86639e+06	310722	267.114	38.9595	100.767	311.164	154.437	473.33	1262.07	32.6664	33.0503	85.1519
Monkey 11	Feces	2342.05	12655	460.836	321.332	153.525	27.3304	6.02357	546.099	85.0219	68775.9	3789.26	10734	1.7898e+06	77865.4	2.14138e+06	430381	521.908	56.4321	142.072	462.803	216.714	942.551	1978.67	44.7841	118.36	157.009
Monkey 12	Feces	1321.18	6479.94	260.269	178.255	84.108	12.6227	3.2411	334.002	34.8734	36461.6	2428.43	5745.58	1.27784e+06	45816.3	1.57404e+06	322784	241.16	33.7265	101.34	244.227	137.924	501.878	1133.6	24.4624	26.6777	91.4216
Monkey 13	Feces	2188.87	10806.8	486.912	295.172	145.373	24.1539	5.37584	681.466	67.4468	45954.8	5519.32	9083.34	2.33787e+06	81565.5	2.36555e+06	370503	712.627	71.5022	230.054	557.482	255.894	924.955	2191.63	56.2058	64.8288	154.648
Monkey 14	Feces	1716.26	8319.41	427.576	240.522	113.223	19.7808	4.40402	492.105	57.6849	8247.43543022637	5162.84	8460.24	1.73967e+06	82989.3	2.12821e+06	402599	540.055	65.8944	181.921	461.911	222.387	803.473	1951.44	53.4845	67.5311	152.387
Monkey 15	Feces	1723.34	9395.98	328.076	221.377	100.547	19.2971	3.75268	2046.53	103.189	19344.6	4172.36	6767.61	1.73207e+06	52764.2	2.79745e+06	527626	517.476	70.9653	607.707	539.875	221.49	1035.51	2217.1	38.3942	36.7509	157.473
Monkey 16	Feces	1873.22	10595.5	482.205	297.261	134.133	24.2937	4.84066	763.907	70.3406	41994.4	5117.9	8710.32	1.94448e+06	52711.2	2.04279e+06	388902	484.022	54.2998	221.206	488.239	232.818	828.593	1960.79	56.2891	61.2027	158.906
Monkey 17	Feces	858.818	4581.69	278.943	139.787	61.7257	11.3881	2.37926	560.105	53.5551	74950.3	2141.22	6507.23	702241	31638.2	1.01229e+06	209277	213.685	23.3074	152.547	206.236	102.703	297.681	764.868	26.1442	42.9212	68.5014
Monkey 18	Feces	1186.4	6579.33	323.839	190.326	82.3971	16.9408	3.31645	378.516	48.9412	39418.5	2958.45	4230.13	1.05364e+06	45053	1.33552e+06	270036	275.098	39.3907	101.623	281.191	144.148	497.079	1201.62	34.9633	43.4208	122.174
Monkey 19	Feces	910.693	4759.3	247.001	123.619	55.7027	11.0138	2.43369	480.66	47.265	21758.1	2115.86	3721.21	728419	50650.5	1.00309e+06	230352	292.537	25.9902	137.36	248.804	102.089	457.433	829.896	22.3371	40.7273	83.9183
Monkey 20	Feces	428.238	2398.59	132.06	70.608	28.8259	6.02902	1.20014	129.622	28.9621	79663	1030.79	2051.64	313635	30564	629783	103091	154.799	11.5615	38.4971	103.963	58.8406	189.574	407.887	13.1358	27.1077	35.5834
Pearson Correlation with Stool Water	Feces	-0.0751386	-0.114372	-0.233283	-0.0661201	-0.0595351	-0.0821156	-0.0249747	-0.143943	-0.0227858	0.175017	-0.423107	-0.095121	-0.280717	-0.0757897	-0.254256	-0.189642	-0.330024	-0.294304	-0.218371	-0.298816	-0.317824	-0.286796	-0.306984	-0.383186	-0.0705877	-0.271712
ｔ	Feces	-0.31969	-0.488444	-1.01782	-0.281139	-0.253035	-0.349567	-0.105992	-0.617126	-0.0966969	0.754175	-1.98116	-0.405403	-1.24087	-0.322476	-1.11537	-0.819452	-1.48328	-1.30649	-0.949381	-1.32847	-1.42215	-1.27013	-1.3685	-1.76007	-0.300227	-1.19784
p	Feces	0.752884	0.631133	0.32225	0.78181	0.803108	0.73072	0.916761	0.54488	0.924036	0.460497	0.0630609	0.68996	0.230582	0.750808	0.279361	0.423247	0.155299	0.207835	0.355	0.200622	0.17208	0.220212	0.187995	0.0953794	0.767444	0.246515
Spearman Correlation with Stool Water	Feces	-0.239098	-0.255639	-0.350376	-0.195489	-0.174436	-0.23609	-0.160902	-0.263158	-0.0706767	0.458647	-0.476692	-0.311278	-0.404511	-0.209023	-0.374436	-0.371429	-0.377444	-0.389474	-0.350376	-0.419549	-0.42406	-0.409023	-0.396992	-0.430075	-0.302256	-0.345865
ｔ	Feces	-1.04471	-1.12186	-1.58713	-0.845705	-0.751593	-1.03079	-0.691663	-1.15728	-0.300608	2.18977	-2.30065	-1.38968	-1.87658	-0.906839	-1.71323	-1.69726	-1.72927	-1.79406	-1.58713	-1.96092	-1.9866	-1.90169	-1.8351	-2.02112	-1.34529	-1.5639
p	Feces	0.309986	0.276664	0.129894	0.408819	0.462011	0.316294	0.497974	0.262287	0.767158	0.0419543	0.0335841	0.181576	0.0768844	0.376472	0.103841	0.106871	0.100873	0.089619	0.129894	0.0655483	0.0624065	0.0733409	0.0830713	0.058396	0.195238	0.135252
Sample	Plasma/Urine/Feces	24 Mg	44 Ca	56 Fe	66 Zn	52 Cr	59 Co	63 Cu	78 Se	23 Na	27 Al	28 Si	34 S	35 Cl	39 K	55 Mn	60 Ni	85 Rb	88 Sr	90 Zr	95 Mo
Monkey 1	Urine	61.7239	167.728	0.445793	0.107791	50.5899	79.892	57.5487	62.9739	28033.8	548.662	1470.74	46281.2	1.75644e+06	100180	7.83831	40.3693	56.2835	17.1724	337.101	69.7063
Monkey 2	Urine	270.841	531.526	0.59623	0.852174	50.6682	156.925	72.4034	47.7811	37983.9	614.502	1372.68	114490	1.94868e+06	484285	5.42647	48.7488	404.624	44.415	598.241	382.988
Monkey 3	Urine	225.734	940.151	1.31625	0.215056	55.8898	134.013	85.0722	85.71	73728.9	427.943	2304.23	141290	1.5197e+06	450803	4.82349	38.084	290.295	64.5542	566.59	414.925
Monkey 4	Urine	190.119	535.306	0.306079	0.796875	56.0925	71.4041	66.3411	54.8225	9289.82	416.972	1029.5	87693	1.27635e+06	161960	6.63232	20.5645	103.857	36.7155	525.271	262.368
Monkey 5	Urine	21.9875	39.4997	0.496625		58.5006	52.4826	125.498	62.7738	30130	537.682	1961.02	60896.7	1.15082e+06	60154.5	7.23526	50.2724	38.0486	1.18424	529.578	17.7205
Monkey 6	Urine	207.939	1012.03	0.333487		48.5702	90.2003	69.5775	70.3089	43036	636.451	1617.82	99873.4	2.26791e+06	299371	3.61761	38.8459	187.139	52.1151	628.835	286.014
Monkey 7	Urine	60.6042	10.265	0.269305	2.83309	49.3611	67.5682	45.4776	40.0654	103151	581.578	1764.9	51152.9	1.24797e+06	127737	4.82349	41.8928	76.8974	5.32914	437.851	79.1593
Monkey 8	Urine	39.4619	183.165	0.305387		44.3767	56.2388	37.1375	70.5056	7389.9	296.262	1470.74	43845.1	1.64685e+06	34615.1	3.01466	31.2284	22.9868	15.3959	393.9	57.8911
Monkey 9	Urine	54.1005	324.887	0.305075	1.59709	39.2928	63.6304	66.0479	40.0654	15621.5	834.001	1519.76	51152.8	1.6213e+06	67728.7	1.20586	25.1347	37.2558	15.3958	499.002	79.1593
Monkey 10	Urine	187.521	915.201	0.243784		29.8488	82.6768	57.0956	40.0654	18978.8	877.899	1912	97438.2	1.41425e+06	268018	5.42645	30.4666	156.997	44.4152	606.302	258.821
Monkey 11	Urine	316.134	917.338	0.282827	0.300719	31.0525	96.5598	138.105	69.4386	84785	647.43	1470.74	141290	1.18059e+06	289441	9.04413	35.0375	182.386	39.0848	477.557	581.776
Monkey 12	Urine	214.001	736.225	0.259223		48.6722	85.9322	124.685	47.1932	76826	844.978	1568.79	138852	1.01021e+06	116252	6.02937	44.9399	122.098	42.0459	477.554	335.681
Monkey 13	Urine	99.8868	401.768	0.24556		34.6291	81.7358	65.4126	54.7509	39913.6	855.956	1813.94	90130	723986	176763	6.02938	60.176	101.479	31.3853	419.635	226.899
Monkey 14	Urine	173.473	931.192	0.261791		55.8712	78.3308	72.2726	62.1906	113457	998.633	1421.71	60896.8	1.32643e+06	221172	7.23526	45.7017	136.373	48.5611	611.752	290.744
Monkey 15	Urine	30.4255	95.6511	0.28962		36.9998	58.8428	51.6993	54.0578	38630.2	833.996	1617.82	53588.9	1.17125e+06	44468	6.63231	52.5579	49.9401	9.47415	397.113	68.5247
Monkey 16	Urine	62.1478	177.274	0.377388	0.53422	47.0771	65.7871	48.5547	62.3327	105798	471.84	1323.65	85257.4	1.78461e+06	126962	6.02937	5.33135	90.3766	28.4242	370.854	101.611
Monkey 17	Urine	302.01	1213.58	0.57725		68.9251	116.256	130.011	70.0568	70365.5	669.406	1078.53	85256.9	1.92166e+06	325759	5.42643	19.0411	224.428	77.5872	541.399	372.346
Monkey 18	Urine	50.9067	192.927	0.985336		23.3593	60.3674	49.7093	67.604	27397.7	1597.48	982.423	16026	2.58567e+06	85391.4	7.63232	7.33137	57.5621	9.47414	542.438	64.98
Monkey 19	Urine	137.869	805.987	0.362907		35.0358	81.3265	47.3771	52.127	14477.9	431.589	1367.82	77820.9	968706	167109	6.63231	82.796	164.963	36.3855	376.756	220.16
Monkey 20	Urine	262.007	738.219	0.309158		48.3864	100.946	83.5586	61.9261	60108.7	548.657	1225.6	124236	1.19256e+06	331597	7.23527	14.4711	198.246	51.5226	427.131	373.525
Pearson Correlation with Stool Water	Urine	0.220281	0.0146426	0.196891	0.543496	0.18174	0.234012	0.40278	-0.0148519	0.102587	-0.214529	0.308069	0.322221	0.0315188	0.220689	-0.268736	-0.027529	0.258328	0.00878053	0.257438	0.176126
ｔ	Urine	0.958109	0.0621299	0.852014	2.74699	0.784117	1.02119	1.86699	-0.0630181	0.437546	-0.931866	1.37384	1.44409	0.13379	0.959971	-1.1837	-0.11684	1.1345	0.0372541	1.13032	0.759105
p	Urine	0.350701	0.951144	0.4054	0.0132572	0.443169	0.320696	0.0782775	0.950447	0.66692	0.363737	0.186359	0.165895	0.895053	0.349788	0.251931	0.908281	0.271467	0.970692	0.273181	0.457616
Spearman Correlation with Stool Water	Urine	0.245113	-0.0105263	0.12782	0.471579	0.258647	0.255639	0.4	-0.0256024	0.180451	-0.190977	0.282813	0.332331	-0.0736842	0.206015	-0.24247	-0.0496241	0.23609	0.0601504	0.227068	0.227068
ｔ	Urine	1.07265	-0.0446619	0.546777	2.26887	1.136	1.12186	1.85164	-0.108658	0.778367	-0.825441	1.25094	1.49493	-0.313468	0.893208	-1.06036	-0.210797	1.03079	0.255659	0.989206	0.989206
p	Urine	0.297601	0.964869	0.591246	0.0358101	0.270856	0.276664	0.0805539	0.914676	0.446465	0.419927	0.226971	0.152259	0.757529	0.383533	0.303004	0.835414	0.316294	0.801113	0.335674	0.335674
