# Supplementary material for: Multi-Omics Analysis to Generate Hypotheses for Mild Health Problems in Monkeys
Source: Metabolites. 2021 Oct 13;11(10):701. doi: 10.3390/metabo11100701 (PMC8538200; doi:10.3390/metabo11100701)
Supplement: Supplementary file 1 [file metabolites-11-00701-s001.zip › Suppl_Table_S14_Food_Metallomics.xlsx]

## Sheet: Food Metallomics
Sample	23 Na	24 Mg	27 Al	28 Si	31 P	34 S	35 Cl	39 K	44 Ca	47 Ti	51 V	52 Cr	55 Mn	56 Fe	59 Co	60 Ni	63 Cu	66 Zn	69 Ga	78 Se	85 Rb	88 Sr	89 Y	90 Zr	95 Mo
n=5	Conc. ng/mL	Conc. ng/mL	Conc. ng/mL	Conc. ng/mL	Conc. ng/mL	Conc. ng/mL	Conc. ng/mL	Conc. ng/mL	Conc. ng/mL	Conc. ng/mL	Conc. ng/mL	Conc. ng/mL	Conc. ng/mL	Conc. ng/mL	Conc. ng/mL	Conc. ng/mL	Conc. ng/mL	Conc. ng/mL	Conc. ng/mL	Conc. ng/mL	Conc. ng/mL	Conc. ng/mL	Conc. ng/mL	Conc. ng/mL	Conc. ng/mL
Food 1	3669.75	1.86888	34.6916	121.628	13130.3	1217.99	71334.7	9508.26	2.11092	3.87719	0.34315	2.62119	2.66734	2.38724	2.34821	4.55947	2.02202	2.02332	2.36836	180.649	12.8797	19.0393	0.391034	3.37099	6.59884
Food 2	3781.14	12.8231	50.2937	224.705	14316.7	1607.79	87127.7	10184.5	12.4454	12.117	0.560518	12.5641	12.5438	12.6391	13.8859	4.98696	11.9854	12.5559	2.43889	88.5447	14.555	20.4065	0.351921	6.05214	7.87766
Food 3	2736.64	3.37409	28.9802	159.905	11731.5	828.208	73504.4	8213.23	3.67181	3.87719	0.308832	3.62676	3.33642	3.34372	3.36597	3.44536	2.73707	3.32085	1.80419	103.096	9.93104	16.0095	0.413385	4.57152	7.0961
Food 4	2794.17	4.29083	37.5477	162.85	12594.4	1753.97	65518.5	8490.02	3.97267	4.36186	0.388909	2.86886	2.90178	3.24348	2.81171	4.13207	4.07705	3.35505	2.24141	99.4216	11.6678	16.5959	0.446913	6.43864	7.52238
Food 5	3410.54	1.8287	27.223	108.872	12411.7	1461.61	81039.3	8523.54	2.76522	2.90787	0.468991	2.31891	0.957487	2.16871	2.58506	4.20838	2.40611	2.64436	2.453	177.101	11.6359	16.7275	0.329572	5.74086	6.74091
